# Supplementary material for: Constructing temporal regulatory cascades in the context of development and cell differentiation
Source: PLoS One. 2020 Apr 10;15(4):e0231326. doi: 10.1371/journal.pone.0231326 (PMC7147753; doi:10.1371/journal.pone.0231326)
Supplement: S5 File — Random expression values with time points and gene names taken from dataset2. This format is ready for upload via the webtool. (CSV) [file pone.0231326.s005.csv]

C20_day0_A	C20_day0_B	C20_day2_A	C20_day2_B	C20_day4_A	C20_day4_B	C20_CM_A	C20_CM_B
A1BG	664.989531505853	862.566948868334	396.133326459676	896.92656788975	49.7156255878508	957.721000770107	277.960109291598	583.184927003458
A1BG-AS1	892.158118076622	49.4121101219207	349.313850514591	40.4980997554958	35.5085339397192	418.839891208336	716.282239183784	892.578903585672
A1CF	557.825202122331	557.84008721821	231.369485845789	655.834039207548	453.193944413215	667.859626933932	138.671617023647	477.269099792466
A2M	966.688187094405	340.139364358038	70.0860244687647	242.547438712791	521.900143008679	631.479790434241	822.821544250473	90.9034302458167
A2M-AS1	715.266837738454	472.41379856132	419.229167280719	348.037816816941	796.861101407558	358.589640585706	194.964167661965	603.810679167509
A2ML1	955.560435075313	379.08731168136	438.243290642276	988.712579710409	948.595110792667	648.162306519225	533.435489051044	498.338753823191
A2MP1	907.872375799343	824.694053269923	286.83080826886	902.551863342524	21.0951208136976	412.8587115556	885.651485063136	716.394782997668
A3GALT2	996.240143664181	752.918800339103	250.64724450931	419.18210987933	245.27935241349	408.306740457192	416.104769799858	534.464940894395
A4GALT	202.954855747521	828.154424671084	369.729462778196	777.4157456588	80.9469437226653	429.274969734251	138.092572800815	442.816392052919
A4GNT	605.620792601258	926.965932361782	465.558571508154	581.958137219772	952.420655172318	528.125686338171	448.69348895736	923.293544910848
AA06	510.523431235924	943.094997201115	291.432822821662	442.926599876955	186.100859427825	642.304777866229	858.991240384057	283.933734986931
AAAS	509.564969455823	326.521639479324	651.593294460326	791.122210212052	531.615285901353	632.431527134031	758.008693810552	723.042631754652
AACS	466.645350679755	545.613192487508	950.947857927531	131.064440822229	26.5810512937605	673.844732344151	210.436201188713	327.621933771297
AACSP1	931.719236541539	87.2115031816065	866.280493792146	451.13984355703	838.922956725582	501.017851289362	417.02159261331	505.657619098201
AADAC	634.678042493761	240.197569597512	679.912694962695	39.9380698800087	425.099010113627	992.198428604752	807.185002602637	448.570207459852
AADACL2	471.986456308514	665.752402273938	363.976825028658	233.659027377144	893.422272522002	58.5251639131457	773.664081236348	557.763048447669
AADACL2-AS1	269.855086458847	770.661361515522	875.380357960239	970.794597640634	344.871299341321	769.422063836828	827.528893249109	761.643892154098
AADACL3	651.660180650651	126.985208131373	913.974232506007	239.176611183211	137.641663663089	170.081502757967	662.033204454929	964.405001141131
AADACL4	507.635694928467	91.9638888444752	275.266527198255	867.695976048708	906.497076852247	737.600172869861	88.6784738395363	173.926872899756
AADACP1	31.3326548784971	289.312559645623	799.744636518881	14.4980135373771	85.6907372362912	583.853952819481	87.7239550463855	708.497949875891
AADAT	842.398540116847	96.1729136761278	126.900329487398	505.97126269713	120.344395050779	710.546897724271	887.450731359422	919.424463063478
AAED1	715.554727241397	675.169088877738	478.531183674932	990.697988076136	350.489371689036	263.670333428308	255.416811211035	753.62529582344
AAGAB	550.407635746524	630.923145683482	228.831532644108	687.77487333864	903.142715338618	687.712939223275	69.6609753649682	56.6043222788721
AAK1	52.6291592977941	335.187766468152	144.904371583834	27.8558686841279	618.24769875966	199.980737175792	389.476161217317	535.175367258489
AAMDC	357.100923312828	324.230856727809	307.643245905638	533.930894453079	734.398834174499	483.146794606	282.130971550941	865.514953853562
AAMP	432.627102127299	767.458642367274	280.945420498028	404.342289082706	104.676878079772	646.979593439028	368.184346240014	2.9929184820503
AANAT	383.963933214545	671.467426465824	9.62900347076356	755.418310174718	800.505498657003	990.03902473487	161.809283308685	250.231453217566
AAR2	775.993073359132	75.2297672443092	858.2612213213	965.300397947431	76.2753682211041	303.071795031428	34.6181062050164	557.984617073089
AARD	786.734794732183	240.342222619802	52.4122638162225	322.041307808831	716.102343983948	337.241653352976	775.216134963557	781.326345168054
AARS	317.206700099632	186.95940868929	390.669909538701	200.130494777113	666.432745987549	512.810170883313	395.675644744188	353.157188510522
AARS2	121.436519781128	996.26599275507	264.041931601241	244.993423577398	598.41193142347	365.006442647427	89.6941376850009	341.83780872263
AARSD1	830.213559092954	492.903628153726	259.28869843483	541.383097879589	748.261637985706	103.297157911584	372.681871289387	329.631231026724
AASDH	22.7822358720005	789.159071398899	675.260422518477	882.579360390082	888.775006635115	305.845667840913	844.559281831607	577.634358312935
AASDHPPT	448.021018877625	645.946732722223	591.507833451033	11.0289768781513	690.306056989357	349.482737015933	301.304754801095	395.715166581795
AASS	868.100978201255	633.471042849123	49.0449131466448	467.98823447898	564.49044123292	666.749914409593	395.769642433152	125.637501245365
AATBC	643.602935597301	82.7706893905997	962.305962108076	636.173981009051	318.637299351394	732.719189021736	674.430738203228	535.486651817337
AATF	349.878842243925	41.202757274732	437.594751594588	396.560357650742	353.157602483407	422.300651203841	629.364608787	205.533435568213
AATK	49.5839696377516	486.50053050369	250.372963491827	489.218976581469	676.917175063863	875.159031944349	90.2949701994658	997.901164460927
AATK-AS1	451.04182488285	638.39103304781	441.524038091302	639.864921336994	172.936977585778	758.398042991757	838.867041515186	476.320530753583
ABALON	696.764234220609	81.3001350034028	108.818132663146	162.35510003753	804.652094142511	526.264223037288	744.86325844191	487.06709803082
ABAT	304.1894917842	165.843757800758	891.542718280107	673.189555294812	516.893106279895	392.985960235819	203.232914675027	804.341081297025
ABCA1	887.991399038583	26.3886055909097	23.024027235806	188.130798516795	845.090647228062	256.454908521846	758.765474194661	387.861663009971
ABCA10	901.297060307115	975.341355893761	879.699955228716	203.301694476977	415.98381800577	454.297195887193	18.2859348133206	47.7285543456674
ABCA11P	905.391910579056	323.481048457325	128.554245922714	637.765542371199	38.9218071941286	412.576524540782	84.6972961444408	29.7262780368328
ABCA12	898.397587239742	234.475580276921	985.379746882245	845.590290846303	679.912190884352	725.125551689416	912.960818503052	108.483226737007
ABCA13	883.82487394847	545.9911278449	559.644151246175	274.136864347383	792.769409716129	80.3860819432884	820.513063808903	801.819074200466
ABCA17P	787.926019867882	169.161251513287	932.802831521258	86.85402572155	368.824127828702	80.6612395681441	717.906952835619	687.626955099404
ABCA2	413.008549250662	449.232370359823	861.224064370617	580.764828016981	967.849847394973	976.102316752076	241.765269543976	315.550823230296
ABCA3	243.435598444194	430.802066810429	937.725211959332	503.432642435655	379.09401813522	133.119606645778	432.360624196008	816.523639252409
ABCA4	621.031118091196	21.7671995051205	260.492117609829	693.855313351378	612.494159955531	658.098652493209	131.152142072096	888.512381585315
ABCA5	731.91204154864	232.121537439525	846.619004849344	518.130256794393	418.96461439319	599.828028352931	461.308917496353	947.815021965653
ABCA6	747.375776059926	385.878509841859	470.568072283641	528.185463510454	839.327092980966	205.617378698662	934.146322775632	602.767669362947
ABCA7	365.583278704435	337.442009244114	603.475816547871	523.427146021277	738.455166108906	643.395513994619	647.065684432164	200.905784731731
ABCA8	846.241760533303	193.129310384393	222.281919093803	952.745751943439	524.491128977388	798.869642661884	263.406761921942	646.077026845887
ABCA9	187.535739969462	717.053308617324	929.001623531803	898.308573057875	690.905706258491	886.583517305553	905.421900795773	662.361796479672
ABCA9-AS1	817.809807136655	527.55038603209	374.314962653443	649.526730179787	339.463726617396	835.901135811582	241.773426532745	308.058384340256
ABCB1	230.799209559336	944.569149287418	620.957700302824	697.297021280974	251.688026590273	63.999458681792	786.926284432411	934.768917737529
ABCB10	31.0540359932929	363.030810141936	128.638807451352	15.0985468644649	433.523966697976	511.542914435267	554.828519001603	770.473878132179
ABCB11	496.512024430558	58.869083179161	621.751815779135	807.681794976816	720.743691315874	260.313619626686	781.71864640899	630.205484572798
ABCB4	106.522164540365	32.2369609493762	860.876124352217	284.543554065749	160.412761149928	133.916211780161	344.589178450406	853.16799627617
ABCB5	609.348780242726	744.407510617748	551.041088299826	289.064275333658	720.381291117519	358.266197610646	812.121892813593	353.463583160192
ABCB6	129.605236696079	341.524469666183	655.425598146394	75.0373124610633	647.076149238274	837.956132832915	607.343847630545	252.093167975545
ABCB7	895.360799040645	992.342930287123	689.980782801285	662.405979353935	40.7442690338939	633.15064762719	740.294634364545	785.293094813824
ABCB8	555.918589700013	209.373339544982	25.214537512511	327.129030134529	656.579526839778	548.564726486802	772.307975683361	676.197528140619
ABCB9	593.496598536149	956.466544419527	801.664086757228	35.1378195919096	805.712298722938	741.240948671475	933.355106972158	900.058167520911
ABCC1	685.189635492861	718.724136473611	620.844571618363	764.104354195297	788.071142043918	203.683403786272	292.937728809193	370.243082288653
ABCC10	300.708405906335	987.9543450661	442.766910418868	454.995287582278	378.645242657512	152.020488400012	30.8241278398782	305.150569183752
ABCC11	942.823118297383	666.737221647054	796.741346595809	748.76301875338	963.469182606786	124.181796563789	551.267364760861	40.0015690829605
ABCC12	320.753179723397	232.309017796069	891.107130795717	44.1657390911132	176.888040266931	387.680685613304	895.192915108055	488.979340530932
ABCC13	678.422530414537	366.63290578872	808.173347031698	322.128202999011	869.276202749461	26.8702015746385	466.03315253742	999.675187515095
ABCC2	297.74633096531	394.366395659745	713.709966512397	89.9836937896907	417.834853287786	81.379372626543	549.28319179453	808.483297005296
ABCC3	794.40186265856	67.2586234286427	92.3590413294733	242.694888496771	979.462676215917	945.744507480413	180.142648285255	711.434416705742
ABCC4	209.142608102411	249.504332430661	743.463854771107	46.708433656022	503.696829779074	651.628164807335	458.305108360946	55.3537597879767
ABCC5	131.45607477054	380.342768970877	486.649271799251	458.655002294108	606.141896685585	857.582294847816	380.8434586972	232.025375124067
ABCC5-AS1	64.3050230573863	922.23682324402	106.49734036997	354.613104602322	64.4125477410853	110.218086279929	1.96042214520276	846.840012120083
ABCC6	692.146249348298	121.75451614894	343.287860741839	950.041804229841	345.842476468533	246.362951118499	910.656429128721	347.331852186471
ABCC6P1	662.669003475457	644.748114747927	997.275351081043	567.782105179504	702.856815420091	350.174832390621	660.061005968601	233.680273173377
ABCC6P2	154.265756485984	929.500710219145	853.750759735703	966.825856128708	9.29456786252558	16.8530321680009	520.949678495526	809.2541762162
ABCC8	656.785126775503	549.536840291694	136.588748777285	977.824639994651	143.307713326067	967.46341465041	913.270914927125	792.019249405712
ABCC9	346.835038857535	227.686295518652	665.342068765312	346.184303751215	400.636275531724	220.123027684167	458.831899333745	382.389401085675
ABCD1	982.897169422358	505.477305967361	99.8177716974169	511.845546308905	948.290542699397	27.7451288420707	418.885796098039	650.776280788705
ABCD2	970.553884282708	320.364280370995	746.527036651969	717.183498200029	948.529212502763	819.160356884822	734.453609678894	629.753658082336
ABCD3	458.065393380821	906.487319851294	531.943093286827	256.916797952726	994.776163715869	15.4053028672934	907.061835983768	594.377887668088
ABCD4	658.252705354244	543.054887093604	563.319296808913	413.058317499235	689.555226592347	284.518969943747	821.014325832948	807.52731137909
ABCE1	638.342044781893	429.169720970094	171.131927287206	336.062568007037	828.01995635964	413.113133283332	599.451440153643	785.921926377341
ABCF1	742.950001265854	582.594126695767	809.442367404699	568.88914341107	456.431017722934	48.3385971747339	341.524313669652	418.245939072222
ABCF2	701.385211665183	913.206586847082	233.640072867274	894.991462584585	586.776250740513	35.3008492384106	0.436646863818169	486.034324625507
ABCF3	136.595000047237	64.8531808983535	35.7624974567443	74.6583379805088	10.5284170713276	673.531314823776	144.023359986022	32.7732905279845
ABCG1	136.029550805688	491.759343538433	589.935848722234	915.117954602465	262.685439083725	741.233726032078	798.08214190416	959.421453764662
ABCG2	894.382300321013	154.453332070261	668.670529033989	766.195868141949	726.854789536446	685.687508666888	465.923100942746	252.500552218407
ABCG4	625.809358432889	791.052443208173	126.521197147667	925.677784718573	701.116137905046	922.181438189	652.234297711402	640.047322958708
ABCG5	102.835593977943	697.181499097496	738.108569988981	77.0017756149173	167.379193240777	647.774075390771	102.625135565177	663.644746877253
ABCG8	898.310253629461	407.111510634422	898.753987392411	276.280994527042	731.957823270932	571.89338398166	738.812550669536	218.888065544888
ABHD1	726.05502884835	342.756261816248	781.237684190273	290.454387199134	617.660595104098	670.11487018317	834.594609448686	899.533595424145
ABHD10	287.58095158264	481.468614423648	132.921248208731	841.005717171356	923.356818035245	392.302261199802	26.0490837972611	523.689821828157
ABHD11	391.628372948617	9.66916023753583	498.07269894518	248.230526223779	802.29549179785	468.197129899636	887.194344308227	548.580604372546
ABHD11-AS1	726.728933863342	88.4655974805355	375.699718249962	170.481283450499	169.062388129532	499.151667347178	107.270154636353	804.616095963866
ABHD12	350.804703310132	379.090224858373	820.004696026444	722.938405349851	493.49365523085	864.367021713406	817.629565950483	760.710834758356
ABHD12B	270.856611896306	146.545776864514	524.696122854948	106.355247320607	240.731542231515	369.856318458915	333.414588356391	153.385317185894
ABHD13	777.58330013603	659.455526154488	979.225303977728	898.241173475981	739.203158766031	635.75335405767	282.547762384638	392.676314804703
ABHD14A	595.253025414422	209.13283363916	700.73913782835	684.484790312126	866.181994555518	449.951416114345	175.961979664862	551.781445275992
ABHD14A-ACY1	318.135032430291	616.405301261693	785.224277991802	766.221855068579	73.5313342884183	812.074377201498	867.883124621585	54.4348109979182
ABHD14B	108.056348748505	142.026862828061	232.95065225102	302.504204912111	611.589317908511	674.614006653428	273.091301787645	66.1854641512036
ABHD15	204.777899198234	403.557312209159	121.652122586966	196.964508388191	420.390456914902	878.469866001979	768.394737271592	242.671102518216
ABHD16A	994.449774036184	826.795233413577	24.3172496557236	775.84957680665	575.250856811181	718.301653163508	588.132433360443	221.204025438055
ABHD16B	256.35680439882	776.605834951624	212.459955131635	668.267511529848	344.562908401713	674.665337661281	842.515918659046	850.429893471301
ABHD17A	666.760951746255	40.7044771127403	235.384137835354	116.669379640371	565.210054628551	8.45928257331252	106.56440583989	152.810502797365
ABHD17B	922.154808882624	630.193972261623	937.911677872762	879.702572245151	318.625209620222	660.829817410558	316.007772227749	389.815750997514
ABHD17C	750.963818980381	603.809745050967	751.661173067987	954.981864895672	256.668910617009	803.900999482721	577.505570370704	776.03922970593
ABHD2	128.987196134403	961.995101766661	786.238593049347	582.339020445943	777.282332535833	353.338776854798	707.143097184598	417.696906253695
ABHD3	249.666572315618	967.280332231894	166.380835697055	146.216440014541	41.1313395015895	399.630235508084	686.645445413888	898.488783277571
ABHD4	80.53102879785	975.470244884491	632.962550967932	570.344479754567	768.701512599364	624.181148596108	386.466359719634	426.293905591592
ABHD5	140.978881856427	588.024318451062	747.344417730346	475.379674928263	570.962577359751	279.517791233957	175.123919965699	387.977238744497
ABHD6	761.296699522063	813.821009593084	513.441157760099	75.669156620279	589.079325087368	455.190203385428	210.985729238018	169.432831229642
ABHD8	829.213111894205	25.2606587018818	293.051737826318	66.2681895773858	897.933522704989	91.0273019690067	44.101080391556	336.826913524419
ABI1	689.28882619366	582.390150986612	159.485317533836	228.094848105684	46.1630311328918	224.487779196352	969.560768222436	195.108087034896
ABI2	22.4657878279686	73.7302883062512	748.331476701424	461.611367762089	75.6153657566756	66.4794184267521	123.575080418959	948.46609281376
ABI3	87.8062041010708	934.059163788334	320.980261778459	63.9458307996392	376.274604583159	751.66739965789	778.910328401253	171.029039891437
ABI3BP	825.00440068543	470.828858902678	831.04154211469	818.996205925941	320.564943132922	334.055889165029	6.99192914180458	123.021181905642
ABL1	982.102595735341	205.606390722096	415.645508794114	760.352885350585	835.688367253169	730.838960967958	669.211821164936	257.245722226799
ABL2	413.398874457926	871.849194867536	497.880469541997	956.845738459378	32.3442341759801	730.142240878195	665.883454494178	747.29886977002
ABLIM1	295.687665930018	190.529010957107	95.3753881622106	704.67766537331	296.642982168123	603.64200710319	165.417543612421	621.884128311649
ABLIM2	488.011224893853	609.98221533373	603.30926743336	909.797033993527	116.198256378993	534.927847096696	34.1214791405946	849.126485642046
ABLIM3	485.01730686985	286.486919503659	79.2282538022846	315.860541537404	195.749339647591	43.2876066770405	50.1411182340235	221.609045518562
ABO	80.3091854322702	37.6025810837746	201.126331463456	975.576472934335	996.251069474965	855.47935240902	788.265208248049	407.76058845222
ABR	597.071790834889	61.6047654766589	471.125090494752	829.236543271691	421.376790618524	501.83292478323	979.87933899276	545.740114524961
ABRA	121.066649910063	735.355887794867	734.568106243387	957.585356198251	873.841879190877	866.374118253589	779.350981349126	592.912607593462
ABRACL	356.151604792103	913.583359448239	987.393370363861	601.302467053756	996.22488906607	15.9272318705916	451.874697348103	228.817102033645
ABT1	941.928164567798	96.1296230088919	321.013749344274	265.47383191064	624.831942841411	501.258321572095	75.4855126142502	125.493676401675
ABTB1	364.85695024021	694.528163410723	930.164653342217	269.971997011453	591.265760594979	488.702666945755	792.664416600019	313.904995331541
ABTB2	528.160980436951	71.7551717534661	526.8437594641	599.937111837789	145.907557103783	610.191557090729	359.533463371918	183.279419783503
ACAA1	249.938916647807	526.424840092659	6.61420822143555	477.160794427618	552.816637791693	184.736329130828	64.2884338740259	641.704401234165
ACAA2	655.1954371389	2.60166358202696	172.602365724742	236.38569493778	301.657116273418	427.168501773849	468.283794587478	949.760407907888
ACACA	662.217022152618	571.789957117289	647.957765962929	362.465476850048	497.505055740476	37.5799625180662	569.168028654531	623.190832557157
ACACB	619.353430345654	514.206361956894	176.558737643063	572.971805930138	274.82020878233	232.076648389921	965.953213861212	641.256930772215
ACAD10	36.0812835860997	347.427362808958	232.431677635759	307.614724617451	882.011033594608	772.462646244094	969.661597860977	354.603249346837
ACAD11	570.055146934465	15.8726454246789	493.704253574833	312.47321004048	10.0084103178233	542.968040099367	417.51021752134	302.329000318423
ACAD8	179.666130803525	811.22344522737	988.578428281471	697.632038267329	385.988741647452	879.679488949478	6.90056337043643	99.5244928635657
ACAD9	974.608566844836	212.202914059162	685.272870352492	593.032354488969	648.762197932228	38.1895173341036	175.027608405799	706.345329061151
ACADL	751.400020904839	46.2673958390951	976.911423960701	856.834890320897	146.349864080548	182.312299730256	872.84561037086	64.4392154645175
ACADM	695.537665626034	858.280598185956	58.8582574855536	97.5254389923066	584.201761055738	161.645344924182	501.675848616287	251.859014853835
ACADS	673.261288320646	795.128958532587	58.261533267796	652.149610221386	855.695812730119	432.556313928217	482.777891913429	769.623615080491
ACADSB	574.906482361257	79.0605833753943	280.825450550765	336.11867018044	363.535048207268	964.381972560659	187.078204471618	912.574043730274
ACADVL	389.048668555915	743.571867467836	261.493990663439	728.30471675843	125.555858481675	596.252979477867	832.791129825637	293.841945473105
ACAN	392.992094624788	256.373872049153	496.306352550164	637.379950843751	921.458798926324	119.828052120283	136.372181354091	651.289818808436
ACAP1	188.929746625945	879.378072218969	479.245911585167	857.470131013542	416.215990437195	485.402862308547	144.232183694839	667.995385127142
ACAP2	944.350591627881	226.514235837385	757.161810994148	590.039601083845	524.169731885195	788.121295394376	877.840139437467	12.1478922665119
ACAP3	558.532628463581	970.743081765249	494.797609047964	56.7945931106806	979.126732796431	761.241280240938	421.184719307348	832.07015809603
ACAT1	105.319543741643	181.112608872354	233.140693278983	121.161967748776	155.343458754942	399.061451200396	989.730207715183	78.264805721119
ACAT2	567.962216679007	477.778461994603	637.71714316681	909.907485591248	18.9811752643436	428.57770062983	223.923866869882	957.208694890141
ACBD3	263.08887405321	48.2141799293458	826.949614100158	424.905521096662	596.445372328162	225.324696628377	709.91923706606	247.00269731693
ACBD4	17.3595764208585	624.018161091954	125.038261292502	578.514877939597	725.21227854304	798.185486812145	379.430408356711	412.301331060007
ACBD5	452.379751717672	753.874509595335	907.153166132048	754.978829296306	982.589418534189	398.763563251123	288.740017451346	193.252227501944
ACBD6	973.808133276179	362.159442389384	195.111420238391	473.589978180826	263.633541529998	434.31489658542	4.9689244478941	644.003866938874
ACBD7	716.571739176288	529.909775359556	86.0954830422997	104.278487619013	872.164750471711	668.144064955413	705.886143026873	415.512482402846
ACCS	939.544984372333	846.404918702319	617.217336781323	688.995498465374	743.702337145805	446.748516056687	373.187348013744	146.198344882578
ACCSL	808.430072152987	308.874243870378	985.038233920932	165.690288413316	652.640004409477	115.569296758622	510.187959996983	753.335346933454
ACD	794.064842397347	523.951923241839	734.096287982538	652.175522176549	836.1520471517	64.7977278567851	620.037413667887	132.080779178068
ACE	857.585034100339	10.1903243921697	329.049547901377	870.480167912319	874.855439411476	715.159610146657	932.353241601959	881.716526811942
ACE2	651.12649067305	843.064665561542	402.611915487796	707.483739592135	850.779281929135	907.341378042474	642.030635615811	958.751125261188
ACER1	846.953827887774	771.121756639332	588.522182777524	332.914194324985	612.58015781641	325.359026901424	738.871686393395	384.263780200854
ACER2	201.831079320982	117.329380474985	441.644329810515	215.241780970246	152.079537976533	18.5747765935957	832.40814646706	682.492216583341
ACER3	141.167754307389	464.415371417999	45.6023167353123	88.5902233421803	731.903690844774	382.79482559301	115.029861219227	629.317983752117
ACHE	990.867069689557	275.973774958402	345.866981893778	49.1540259681642	832.192150410265	658.376018982381	563.760691555217	945.364222628996
ACIN1	858.824546216056	763.856748351827	716.902617597952	569.792977301404	234.490192029625	769.696994451806	885.288222227246	944.03752265498
ACKR1	529.701957013458	748.316513607278	139.275529887527	853.678821353242	181.82552838698	207.031787605956	255.676469998434	284.226821735501
ACKR2	282.359458506107	454.259616555646	637.194814858958	671.870623249561	745.194162009284	299.606849206612	659.388787578791	712.951763067394
ACKR3	441.222092602402	781.819177325815	103.960882406682	896.847976837307	774.477654602379	815.08604879491	576.688685454428	313.174585113302
ACKR4	956.104471115395	88.1805883254856	218.004555441439	919.112559873611	655.254308599979	201.936819823459	566.468723118305	970.845909556374
ACLY	225.568911992013	10.631583398208	684.350500814617	987.565333023667	639.239242067561	681.621024617925	604.311196831986	109.805284067988
ACMSD	20.5671666190028	304.289562627673	896.256365114823	875.074533978477	72.1701798029244	628.860974451527	878.934092121199	10.9692309051752
ACO1	905.309149995446	363.173877121881	628.195256693289	216.698183678091	771.573286270723	639.687112066895	262.575136031955	533.275688765571
ACO2	427.490997361019	439.677796792239	146.394744282588	97.8056155145168	707.084163092077	83.1953445449471	963.50150834769	930.932649644092
ACOT1	179.304886376485	189.301777863875	81.8225073162466	268.871869891882	352.600496029481	552.721156505868	560.994657222182	297.127747675404
ACOT11	947.28301721625	269.685421604663	128.408606629819	296.402210835367	374.294332694262	566.458926303312	534.870838047937	78.3219472505152
ACOT12	624.972242163494	957.603795919567	438.320237910375	986.655344022438	753.974193008617	209.122444968671	504.430036759004	687.734722625464
ACOT13	573.63191829063	352.824453264475	222.618799190968	155.914403963834	258.854229003191	436.520675430074	903.959265910089	309.332035249099
ACOT2	33.7563867215067	494.874164229259	373.18780971691	339.118259958923	884.548851056024	553.735015215352	29.4873614329845	174.631166737527
ACOT4	322.125730570406	424.520684173331	673.15142438747	153.612142894417	752.372758695856	755.13984891586	838.651821482927	834.173972718418
ACOT6	665.007652714849	86.4523116033524	728.729095309973	62.9602500703186	687.566393287852	688.197156880051	258.009148994461	913.75956707634
ACOT7	169.802719494328	503.096647327766	980.666735209525	393.568930448964	894.47279390879	175.938962958753	912.923203315586	723.864000756294
ACOT8	420.582857448608	730.906867654994	572.264774236828	541.237347992137	63.3645483758301	394.598884740844	958.301331847906	656.889270991087
ACOT9	979.006172157824	257.551901042461	659.044568426907	439.402635674924	324.857266386971	228.172731585801	967.017174232751	122.497228439897
ACOX1	334.438050398603	198.853680631146	521.723200567067	672.45546518825	126.124353148043	380.490505602211	876.676054671407	439.320479519665
ACOX2	48.6292953137308	135.073036886752	416.836145333946	318.814282305539	140.45480475761	746.258485363796	689.54496528022	577.18300819397
ACOX3	990.448466269299	530.152498511598	637.592223240063	725.406847894192	465.63817281276	513.194469967857	307.87636898458	481.428511673585
ACOXL	372.871748637408	58.5036335978657	972.444546408951	474.829086102545	248.079971177503	454.813325079158	5.17661822959781	95.3932965639979
ACP1	452.830136753619	68.9586473163217	46.3302603457123	182.984568411484	76.6020095907152	787.815080722794	474.719216581434	326.492433669046
ACP2	985.736301168799	841.387955471873	532.933132722974	449.357439298183	107.426590053365	653.352218447253	825.393807608634	803.326998837292
ACP5	711.527732200921	669.207299128175	536.896746372804	990.610263776034	690.267767058685	584.662376670167	478.004697710276	278.770627686754
ACP6	640.553501667455	263.575577642769	874.713357770815	790.339093888178	891.616673208773	157.018837984651	850.34427489154	498.63897706382
ACPP	484.490684699267	550.575219560415	210.600552614778	247.983618406579	146.884236484766	60.257158940658	559.082098538056	184.986548963934
ACPT	316.470739897341	448.57036601752	474.119779188186	248.35957121104	528.199843131006	885.795825626701	970.603855792433	485.51563709043
ACR	37.4443316832185	217.691941419616	386.315104085952	789.020557422191	464.002182241529	927.295638015494	851.877590175718	112.379242200404
ACRBP	877.299829851836	599.854237167165	208.108935970813	851.551841245964	828.447101870552	844.80825997889	66.645689541474	264.305544085801
ACRC	652.756478637457	853.648623917252	292.038122424856	46.7998848762363	368.014004547149	932.56634962745	907.07894670777	67.0595681294799
ACRV1	818.971748463809	808.254422619939	66.9785174541175	893.199623795226	250.88545656763	936.585260555148	49.6430180501193	471.920785028487
ACSBG1	507.060170173645	441.540241474286	630.564486142248	435.307399369776	664.293356472626	98.9185022190213	536.503470269963	787.055578548461
ACSBG2	835.942505858839	49.1284690797329	785.956668667495	219.973844941705	40.0193415116519	631.692646769807	895.434361882508	800.800799159333
ACSF2	661.362828221172	829.489156603813	892.789067467675	803.732430562377	759.781409986317	915.145123144612	673.56829950586	390.356664778665
ACSF3	33.3578714635223	115.729198325425	827.535120770335	674.827990122139	77.2785705048591	602.104591671377	361.167408525944	485.227752709761
ACSL1	339.030980598181	359.052258776501	209.036911837757	419.311305973679	712.624785955995	345.667548943311	141.805625753477	921.724468236789
ACSL3	542.837172513828	778.417724883184	377.74539901875	628.769082017243	325.822287471965	404.248466016725	972.235452849418	536.377928685397
ACSL4	199.163883225992	84.7299001179636	688.523272750899	823.502912884578	370.826068799943	349.975065328181	58.2067633513361	419.778738869354
ACSL5	753.326215781271	785.567688755691	510.081373620778	307.590597076342	296.080879867077	697.107520652935	294.341261731461	367.602217942476
ACSL6	292.28316876106	233.600281178951	545.973810134456	994.672545464709	130.071273772046	720.334463985637	546.609126729891	253.502790350467
ACSM1	377.685690065846	92.6075412426144	788.545507239178	947.705890052021	14.9496069643646	842.358907219023	391.121848253533	205.377292120829
ACSM2A	817.139476072043	46.4874929748476	94.8138888925314	809.884359827265	158.278766553849	891.370906494558	318.818916101009	562.01130989939
ACSM2B	892.601162893698	632.248952751979	876.990243326873	255.464441142976	727.372957393527	940.537425223738	458.805587608367	579.875251278281
ACSM3	121.950624044985	787.388785975054	451.554165920243	866.21144041419	128.466284833848	221.63077397272	215.330503880978	301.751624792814
ACSM4	127.647279761732	942.602787632495	687.413361622021	844.838800374418	127.180487383157	778.636411996558	619.092076551169	335.415384033695
ACSM5	211.10328566283	315.886824857444	511.838738806546	915.701158111915	785.02322291024	422.895164228976	992.908716434613	867.697912734002
ACSM6	216.165513498709	726.101940032095	633.972622919828	896.776197943836	486.473978962749	934.740779688582	600.805091904476	842.270204331726
ACSS1	748.294098535553	377.253050450236	366.158216027543	379.920793930069	173.568524885923	177.945809438825	362.807327881455	367.568698478863
ACSS2	556.075134081766	96.2162208743393	890.352854970843	203.882483765483	311.376822413877	995.777344331145	768.382930196822	61.9732167106122
ACSS3	928.700919263065	786.04745818302	575.371506856754	666.990119498223	722.025700379163	343.967890134081	13.6079685762525	351.498711854219
ACTA1	720.910284668207	70.1277139596641	85.6153888162225	583.335514646024	65.6386248301715	570.988249965012	97.932237200439	383.659995626658
ACTA2	392.517535714433	150.690056849271	946.283017517999	455.355645623058	442.128414055333	246.962511213496	836.262245895341	405.868909787387
ACTA2-AS1	963.923081057146	126.804760657251	206.155281281099	564.911271212623	398.88883731328	860.275219194591	583.360568154603	995.079911779612
ACTB	797.165126772597	762.947553303093	226.335035869852	429.018039489165	760.761566227302	114.069221774116	984.824410174042	935.974581632763
ACTBL2	362.987664528191	869.90023124963	214.925143867731	33.8273337110877	856.218601809815	259.900816949084	120.126769412309	120.538872899488
ACTC1	951.989157823846	707.303310511634	702.02888105996	488.144881092012	20.4772646538913	419.962876942009	330.426275031641	498.626512940973
ACTG1	75.6141212768853	891.179276863113	329.037558985874	239.935959456488	504.79858322069	237.169794272631	51.0978391394019	999.008630635217
ACTG1P17	71.0409115999937	505.994620965794	171.010300284252	389.343447750434	209.593378938735	389.367171330377	358.180495910347	140.634455252439
ACTG1P20	547.202108195052	804.599802009761	63.0480260588229	372.894201427698	800.172075163573	985.259824199602	377.263359259814	785.950009478256
ACTG1P4	750.340682454407	860.155955888331	342.269478132948	598.163722082973	45.2830852009356	455.980431754142	752.727982122451	57.7674740925431
ACTG2	432.648135581985	958.381165517494	373.848057584837	738.521290477365	902.928003808483	497.065477073193	645.769860595465	893.440189072862
ACTL10	659.227488329634	193.552555283532	537.143271416426	355.351140256971	785.011424683034	393.02321174182	815.65430527553	269.277161220089
ACTL6A	690.892467973754	565.472818911076	868.702561361715	527.732421876863	673.432728741318	83.84770154953	490.791027667001	42.6388760097325
ACTL6B	678.008270682767	105.603221571073	782.814564416185	278.264238266274	178.053269861266	102.270278381184	32.7002299018204	520.149731310084
ACTL7A	792.048976756632	286.869552219287	871.55109946616	225.739407585934	513.704519486055	546.737669501454	344.172123353928	854.991428088397
ACTL7B	596.09571332112	280.480562243611	509.7469270695	740.740325301886	470.97738692537	946.799939498305	409.931903705001	959.685749607161
ACTL8	498.685698024929	887.129579670727	770.455204881728	796.170479385182	569.519481156021	199.575691251084	804.83209528029	326.455125818029
ACTL9	286.054202122614	66.4795739576221	159.204717259854	773.939478676766	783.335643587634	145.344684133306	230.845798039809	18.3767995331436
ACTN1	415.458312490955	251.103596528992	623.150374507532	120.307066943496	250.475826440379	665.795722743496	818.894005380571	856.40206746757
ACTN1-AS1	24.9837506562471	713.783413404599	824.14589333348	973.00365450792	465.162085834891	769.222906557843	633.352864068002	434.361405670643
ACTN2	164.542417041957	403.75017025508	601.200802484527	294.196905801073	378.026132006198	646.64246304892	620.469927787781	148.763515520841
ACTN3	723.784916335717	722.684864420444	625.465514138341	986.23523581773	591.955083655193	718.803338706493	255.762073677033	703.475912567228
ACTN4	337.759524816647	709.663787856698	171.872047008947	992.747698212042	633.268633391708	642.614489654079	492.478042142466	629.481344716623
ACTR10	442.940163426101	865.30740885064	649.516119854525	786.479365546256	702.34004384838	743.579857517034	995.857225032523	710.699538234621
ACTR1A	940.77194435522	951.70866092667	605.921937618405	44.9147566687316	317.099606851116	901.119808200747	368.377055041492	884.035051800311
ACTR1B	93.6297024600208	288.982388097793	715.805257903412	848.885993007571	82.965733949095	298.860738286749	982.794042211026	504.049881827086
ACTR2	501.008158316836	468.426869716495	295.009790221229	43.1473811622709	416.20485833846	331.002936232835	753.586087375879	129.419261123985
ACTR3	484.754471108317	116.877557476982	715.063202893361	434.556749649346	890.51943924278	92.1440520323813	141.016678651795	610.335995443165
ACTR3B	659.223248716444	289.004084654152	900.060814805329	504.155203700066	224.372329190373	210.616399068385	600.62010679394	937.087800586596
ACTR3BP2	977.414145832881	959.748946595937	522.481798427179	319.489323534071	595.099094789475	227.413317654282	470.753267873079	895.288986619562
ACTR3BP5	268.525106599554	596.027889987454	950.668469071388	851.989069022238	752.066598273814	909.848992014304	989.61189831607	587.964041391388
ACTR3C	455.270097358152	122.823294019327	430.432348512113	909.495419589803	527.894808677956	776.068074163049	862.379666185006	240.355575690046
ACTR5	474.835805827752	979.219847358763	25.1560702454299	775.76598036103	813.947368646041	419.177403207868	267.703798599541	879.881305852905
ACTR6	523.931950097904	530.228856019676	405.826712027192	331.534415017813	971.686715725809	497.154214186594	618.798293871805	929.539546370506
ACTR8	304.141380125657	385.557894827798	757.214078679681	311.161374906078	746.592491632327	249.745772918686	483.25854097493	830.200925702229
ACTRT1	257.288697874174	830.371017334983	561.618823325261	953.358538681641	798.623090842739	477.476360509172	661.638962570578	936.668755253777
ACTRT2	352.607327979058	191.176735097542	160.477498313412	428.310930961743	587.705647340044	423.895171610638	144.965206971392	519.29706078954
ACTRT3	557.506122859195	905.718747526407	138.914639595896	344.186382135376	983.922194223851	623.809855431318	976.709056645632	369.153168285266
ACVR1	212.818314321339	352.290877141058	312.655141577125	220.494092907757	303.909229114652	785.891510546207	786.26297484152	998.816991923377
ACVR1B	680.727411294356	144.463344942778	309.004836482927	255.524455569685	642.960471799597	747.536015463993	542.391156544909	960.127059370279
ACVR1C	614.611089229584	61.866259900853	845.657963771373	813.369350973517	150.457138195634	569.787082960829	632.700700778514	602.68543031998
ACVR2A	610.893254866824	361.286464845762	679.092139005661	466.590841300786	945.272414945066	848.349173786119	369.806466624141	758.963735075668
ACVR2B	450.620696879923	466.341605177149	438.568765996024	21.9320736359805	998.626139480621	373.761516297236	112.131130415946	63.470666995272
ACVR2B-AS1	222.320610424504	586.829327046871	681.967088021338	320.906875189394	404.317799722776	488.014455419034	559.255672153085	780.620808247477
ACVRL1	140.122450189665	518.397377571091	357.340324204415	891.713304910809	428.897208999842	377.565413480625	3.95288108848035	575.283023063093
ACY1	419.341611443087	522.819573525339	338.855128735304	681.460372172296	182.37759754993	384.822387481108	904.762669699267	271.926590474322
ACY3	611.916024470702	921.044818824157	731.442565331236	747.183372499421	696.777652949095	960.731118218973	358.660678146407	798.771863337606
ACYP1	316.451487364247	631.729539483786	564.383172895759	167.583092115819	417.969039175659	646.630715578794	166.641743388027	920.402135699987
ACYP2	787.031781394035	242.347782477736	171.101669082418	970.936705125496	974.576032953337	202.809311682358	710.347128100693	578.770880121738
ADA	236.002460354939	626.375747378916	198.425389360636	253.688523545861	132.438823347911	781.32824646309	643.947575474158	302.321042632684
ADAD1	288.839914603159	149.133390281349	574.975816067308	932.870445307344	179.695891449228	762.062168912962	377.972492016852	628.586431732401
ADAD2	529.291661223397	94.8773673735559	118.701957399026	44.7346838191152	884.382509393618	44.916428392753	637.462929822505	645.76092059724
ADAL	381.74651702866	651.675249449909	181.642291601747	91.3996819872409	217.596084810793	514.228096231818	128.670059377328	537.25987765938
ADAM10	100.805984809995	190.537697868422	802.569912513718	703.397801611573	861.973702441901	358.738801674917	717.74512110278	341.067776549608
ADAM11	928.226333810017	809.470697771758	970.344345550984	555.198242189363	747.525097569451	561.988692032173	419.59665203467	531.838201452047
ADAM12	120.850263629109	560.043343808502	620.343313552439	850.932587869465	853.136337827891	209.574124775827	555.85272051394	85.1280749775469
ADAM15	676.484388532117	200.905572855845	696.262506302446	20.1432975009084	583.567772991955	977.128227706999	112.178924260661	189.020296093076
ADAM17	571.111016208306	13.5474216658622	929.774852003902	938.161281170323	563.404668821022	536.551845259964	52.701237378642	258.594732033089
ADAM18	510.223845718428	227.709327358752	234.274724731222	419.903028523549	8.04593274369836	489.644360495731	312.079146504402	757.645173929632
ADAM19	184.467058628798	671.109566697851	226.169728441164	808.098622364923	850.307726534083	3.39803355745971	988.158253952861	943.682444049045
ADAM1A	251.463444903493	189.276407938451	423.41458145529	45.4597857315093	280.089769279584	984.928531805053	353.85568276979	481.670176843181
ADAM2	291.837862459943	152.298635337502	324.946167645976	41.5740001481026	353.539849398658	346.352506196126	482.618184993044	798.76572266221
ADAM20	316.414032829925	553.016972029582	377.370967995375	522.516802884638	806.473200209439	757.623313227668	966.253768652678	979.344062972814
ADAM20P1	326.000649249181	219.809763133526	680.054490454495	372.803894802928	648.838993394747	296.253252541646	401.650696992874	884.895378956571
ADAM21	385.669495211914	703.006869414821	160.388926742598	280.655342619866	965.700099943206	916.776239639148	297.157344175503	564.492920879275
ADAM21P1	757.774722296745	331.536465790123	906.992133706808	482.246578205377	350.236877566203	666.8571094051	719.419398810714	616.422903724015
ADAM22	642.145462799817	274.075946770608	308.870326029137	122.606420656666	412.414913531393	186.714388197288	182.156031019986	504.387548426166
ADAM23	522.079234477133	754.818862769753	49.1485486272722	255.827269516885	211.154218995944	274.022241821513	330.727712949738	492.313229944557
ADAM28	874.208505265415	403.947585495189	192.457518540323	806.894502602518	65.1865506079048	858.779063681141	937.352466164157	382.580668665469
ADAM29	600.266429595649	83.3181701600552	141.411705408245	814.123152755201	33.5891412105411	753.54907149449	155.437128385529	588.180117076263
ADAM30	552.033733809367	287.044245982543	477.171588223428	303.399486700073	823.250124230981	822.688866406679	22.0259490888566	26.6919243149459
ADAM32	334.035171661526	821.720280917361	316.098788287491	467.73025370203	177.566313184798	845.787948928773	685.978919966146	735.009526601061
ADAM33	5.3254971280694	4.90104965865612	20.9598392248154	158.130928874016	209.450185997412	679.774892982095	504.761420655996	941.064348677173
ADAM3A	246.18610041216	69.8259877972305	91.1351921968162	337.727825157344	77.6248138863593	579.7628024593	419.780615018681	594.951056409627
ADAM5	986.189790070057	314.095646841452	175.785773666576	501.769532915205	533.032718580216	879.094371804968	713.228688808158	129.94590215385
ADAM6	219.319516560063	665.455507580191	349.594864994287	844.154359772801	969.695601146668	244.076935574412	774.532190756872	237.995671108365
ADAM7	531.894301529974	839.838392101228	715.562618803233	995.729766087607	483.97782468237	465.731230797246	381.240322487429	164.184851106256
ADAM8	477.752388687804	170.523248147219	490.327121224254	407.460483256727	95.0807498302311	965.154694160447	439.335999311879	350.445797434077
ADAM9	840.748211136088	319.671544944867	969.129447592422	862.096833297983	964.249125448987	983.70707849972	612.187037942931	275.346456095576
ADAMDEC1	539.841610006988	622.313761617988	394.834751496091	411.07321716845	952.276418218389	303.667869418859	539.593685651198	587.053292896599
ADAMTS1	270.07733983919	298.238894203678	159.317135345191	227.483556140214	552.795447641984	67.1151883434504	223.241705214605	687.875976553187
ADAMTS10	513.183346716687	641.916625434533	301.091783447191	190.257717622444	79.4996260665357	981.615354074165	651.762733468786	199.486873811111
ADAMTS12	423.632728168741	971.892304020002	386.180111207068	400.692033581436	440.551440697163	477.417154470459	72.1790979150683	74.0900570526719
ADAMTS13	419.495156034827	856.113143730909	483.384064165875	713.512715185061	854.175077052787	623.626596294343	850.431393831968	340.402036672458
ADAMTS14	12.5012926291674	953.288598218933	964.911055052653	284.090826287866	708.237189799547	833.172181854025	475.931583670899	900.268026161939
ADAMTS15	331.832127878442	935.245441272855	171.122802654281	349.339755019173	130.689148558304	967.376661254093	277.928238268942	557.42706428282
ADAMTS16	645.373408216983	745.182262035087	37.6912094652653	500.118323136121	585.149887716398	522.720345761627	713.980450993404	716.035472927615
ADAMTS17	210.972278378904	424.776056548581	980.141146574169	536.192199448124	734.477265039459	609.818588709459	781.329246936366	278.475256171077
ADAMTS18	350.702298805118	954.810637049377	415.250997757539	305.335687473416	911.249733297154	768.967337440699	846.353376749903	50.6618537474424
ADAMTS19	203.811817569658	768.979022279382	458.842577878386	636.85450842604	973.549342248589	964.369639288634	187.573203351349	37.9707901738584
ADAMTS19-AS1	472.851962083951	35.5232716538012	305.136215873063	484.034253517166	228.332147933543	679.773549316451	144.283762900159	218.921672319993
ADAMTS2	124.959335196763	260.973362950608	851.889907615259	591.717695584521	804.492932744324	556.869864696637	247.454385040328	664.556961972266
ADAMTS20	663.192853797227	369.667620863765	408.550134627149	53.5657703876495	684.653370408341	361.056081019342	659.398085204884	848.16636191681
ADAMTS3	105.255273636431	44.1043928731233	437.806309200823	534.145903540775	970.393031137064	573.555731913075	876.595312030986	306.369195692241
ADAMTS4	170.769414398819	447.069539222866	584.745943313465	961.211571469903	648.384605767205	124.859997071326	606.957607669756	855.937066255137
ADAMTS5	327.94761355035	776.211796794087	952.964621596038	341.026079375297	121.980239404365	125.097466167063	132.626604055986	395.915642846376
ADAMTS6	576.122612692416	991.789119550958	9.25386254675686	464.713988825679	928.737961454317	550.480598816648	855.292430147529	202.64061819762
ADAMTS7	300.807276042178	258.567968383431	638.855381635949	619.404795113951	630.748021416366	169.296856736764	176.459179725498	79.4186773709953
ADAMTS7P1	582.137079210952	258.786357706413	866.724266670644	362.484988989308	318.058338714764	440.343426540494	519.162647426128	843.076850753278
ADAMTS8	650.896879378706	124.002517433837	661.268590250984	365.42996368371	246.980800060555	148.845996242017	40.562690468505	884.237746708095
ADAMTS9	450.067378813401	633.797070244327	454.892620211467	932.064738823101	283.6936020758	603.786746505648	761.295143980533	636.167908553034
ADAMTS9-AS1	910.321851726621	757.399120368063	352.813034085557	407.477282220498	67.9302045609802	827.125167706981	586.523918667808	444.213866023347
ADAMTS9-AS2	745.169248897582	444.921101909131	17.4661900382489	200.21847775206	598.665666999295	546.059523709118	398.56934431009	456.400763243437
ADAMTSL1	76.4583316631615	108.786211581901	551.028532907367	808.458020444959	63.725678017363	551.575664430857	906.360347289592	986.009781947359
ADAMTSL2	639.559578849003	496.820162516087	961.1838075798	856.252734782174	773.740209639072	167.097912169993	972.459494136274	178.976428927854
ADAMTSL3	100.398039910942	279.742741025984	935.990918194875	545.781431719661	61.074998928234	950.965126976371	90.7641679514199	482.666708761826
ADAMTSL4	769.276298116893	280.096305068582	550.785416737199	717.610068619251	772.144033340737	0.381282297894359	919.361080043018	560.55977428332
ADAMTSL4-AS1	518.54291325435	836.214025039226	542.365570552647	313.799277413636	387.933396967128	35.890726139769	790.161513956264	391.026352066547
ADAMTSL5	190.094857476652	400.367797818035	728.478475240991	472.54374041222	72.5788788404316	260.55733114481	809.083265019581	662.945312215015
ADAP1	206.216123886406	859.627705533057	894.622317748144	893.378907348961	460.867742076516	828.532474813983	593.583988957107	741.424093022943
ADAP2	641.395540675148	770.202586660162	543.465128168464	408.747205045074	39.5948020741343	958.358049625531	362.837868276983	831.533377291635
ADAR	156.711029587314	671.344006666914	734.770163428038	678.542377660051	286.674698349088	798.95715857856	345.650390023366	801.345495972782
ADARB1	36.7542982567102	268.598907394335	67.0616261195391	323.252344736829	980.724917259067	199.384925188497	837.104335892946	994.94724906981
ADARB2	440.444473410025	832.41574279964	330.424474319443	13.289790134877	674.886494874954	988.487492315471	676.701166899875	200.620800023898
ADARB2-AS1	126.957111526281	669.425560394302	72.1449840348214	940.779643133283	277.40317536518	983.97713387385	792.025168891996	32.6718797441572
ADAT1	719.241328304633	636.694797081873	109.245143132284	662.419776897877	279.344512382522	77.929497230798	814.898319775239	716.694970615208
ADAT2	446.991369361058	143.403965746984	521.336750360206	553.548549767584	534.644442610443	799.811733188108	22.6082373410463	409.545946400613
ADAT3	423.128115944564	930.597992381081	998.832592507824	466.360639547929	726.104774978012	768.710767384619	499.977167230099	632.723507937044
ADCK1	511.359037132934	293.104051146656	74.7266160324216	294.397303601727	503.609767882153	714.474110165611	905.155193991959	568.025345215574
ADCK2	991.690082941204	605.85324279964	765.420885989442	187.103253789246	655.811937525868	772.305992199108	784.286773996428	272.023776778951
ADCK3	335.560083389282	429.707814473659	332.95908360742	878.225452266634	678.690193453804	942.057210020721	149.440266890451	548.624177696183
ADCK4	245.863190852106	494.293689029291	184.520837618038	31.6443108022213	814.382270444185	908.558952622116	174.744948744774	675.405593123287
ADCK5	242.269058711827	727.913525188342	51.7894267104566	181.481322739273	924.810514785349	251.094184350222	85.3959864471108	136.117807822302
ADCY1	363.494319841266	420.050335116684	600.245451088995	860.279008280486	206.598109332845	525.732127716765	630.085304845124	216.168025974184
ADCY10	323.991996003315	993.900082772598	846.826996188611	363.817390985787	563.619543332607	890.072742477059	719.26501695998	850.193169200793
ADCY10P1	345.347400056198	855.96642177552	135.65644947812	617.652632994577	195.338558871299	708.436156855896	770.981094799936	136.09341555275
ADCY2	540.482623502612	137.135130586103	238.65301697515	706.256492761895	384.608302265406	307.41837923415	284.039083868265	884.702542796731
ADCY3	682.024868670851	521.068020956591	253.101083915681	942.493099952117	18.2847939431667	299.896007403731	426.034664269537	586.156965466216
ADCY4	274.757823674008	490.681632887572	310.996541054919	67.2902734950185	614.861686713994	50.0998925417662	177.169873612002	145.418944302946
ADCY5	615.728173404932	321.007302962244	734.393765218556	108.671956695616	271.912997588515	15.7012678682804	785.685121780261	368.922084569931
ADCY6	68.0743174161762	721.959398593754	158.188789850101	329.857759876177	8.60907905735075	317.97588057816	392.039617523551	383.69818450883
ADCY7	829.191989498213	609.657461522147	152.275005821139	836.713086115196	873.646815540269	271.262764697894	5.80128957517445	655.823884531856
ADCY8	846.860300982371	208.99196062237	286.657271673903	443.13845410943	661.331035662442	484.488702844828	208.490877877921	633.993620052934
ADCY9	665.499666240066	545.367695158347	702.607500599697	135.941096115857	292.1276348643	529.188456945121	649.279867764562	33.6738326586783
ADCYAP1	275.101530598477	951.394667848945	458.8510945905	83.6664487142116	235.933250980452	169.93758152239	512.1529919561	278.263413812965
ADCYAP1R1	189.513718010858	688.681537751108	420.149417361245	354.971629101783	938.213431509212	480.03429104574	996.208253782243	74.144764104858
ADD1	892.597582889721	557.97643517144	856.468553189188	547.303390922025	664.818324847147	523.457563249394	976.588198915124	746.713280677795
ADD2	367.300046142191	664.436095859855	531.944644870237	337.8671631217	396.611109375954	995.849628234282	766.145832603797	442.329935729504
ADD3	83.8720141910017	454.985792515799	817.724221153185	956.518490798771	263.336092233658	291.544675827026	494.18968334794	632.147614844143
ADD3-AS1	295.294889016077	79.537185607478	664.07265025191	451.939440099522	163.740735966712	183.394854189828	983.538802480325	789.47966452688
ADGB	973.974445369095	537.996402941644	96.4837919455022	207.464991137385	481.026222230867	374.806256499141	260.869810124859	596.780241001397
ADGRA1	997.875730972737	318.750142352656	572.462771553546	685.317202471197	374.642592854798	304.372367449105	365.365204634145	835.819565691054
ADGRA1-AS1	155.686895595863	544.079630170017	826.871535507962	623.970182146877	194.529085187241	760.570541489869	623.461454175413	839.274987345561
ADGRA2	624.022183008492	777.451650938019	184.670251328498	727.271900279447	151.311295107007	258.349413750693	905.222614528611	395.198069280013
ADGRA3	288.626302266493	349.847292061895	539.79445900768	804.868784965947	865.105120930821	948.485189350322	320.077703800052	482.72242792882
ADGRB1	649.98007635586	45.7540818024427	981.811441015452	311.945169698447	9.87452710978687	216.84166113846	275.902027729899	278.80195248872
ADGRB2	722.098332364112	432.198620866984	78.2371489331126	13.6284600012004	252.551243873313	31.6614818293601	352.815125370398	601.195859955624
ADGRB3	8.10712575912476	515.708024147898	49.3776486255229	199.48567263782	940.039238659665	615.007515996695	422.413709573448	136.891174828634
ADGRD1	573.324705008417	2.04891129396856	331.180555280298	484.514084644616	90.3803410474211	276.619531679899	41.803419822827	925.513787660748
ADGRE1	812.069094972685	218.752692919225	0.523653347045183	954.904592828825	674.554426688701	959.051742218435	728.836503345519	773.035708116367
ADGRE2	908.126363763586	565.888171084225	823.335216846317	874.676366336644	647.001742850989	894.44414107129	803.085563704371	495.418405160308
ADGRE3	919.133370276541	40.429268265143	860.594535479322	417.258689412847	868.627695832402	562.706034164876	649.505442939699	673.523102421314
ADGRE4P	263.027051696554	435.525886248797	106.884347740561	446.188635425642	593.51559728384	574.921399820596	823.36478959769	840.053865453228
ADGRE5	442.241290584207	930.540514877066	934.461880940944	151.613729540259	350.352668203413	37.4947539530694	218.330281786621	735.797837842256
ADGRF1	842.424872796983	747.079369844869	78.9046708960086	442.530921427533	372.14626534842	348.960314178839	825.564582832158	49.2350503336638
ADGRF2	806.559090735391	817.703793523833	597.41975623183	429.61503425613	198.680529603735	211.287817219272	617.496772669256	939.118640264496
ADGRF3	721.452042926103	126.807501772419	826.879925793037	374.403301626444	637.472095433623	697.475239401683	601.706051966175	5.64231886528432
ADGRF4	521.000992273912	818.084110040218	851.75599437207	36.9062446989119	982.579118106514	790.846240241081	764.02770052664	111.685847863555
ADGRF5	450.655609369278	423.102843342349	801.979678217322	262.573983520269	400.719820521772	456.796146696433	134.592619491741	560.769157251343
ADGRG1	160.953638842329	432.190569583327	84.5399824902415	660.798392724246	814.720151480287	743.107358226553	489.246000302956	271.349211689085
ADGRG2	510.233087697998	71.8116955831647	758.762804558501	622.281074989587	126.59555952996	373.389416141436	422.162890667096	267.121937824413
ADGRG3	30.5563630536199	48.1565988156945	996.765654999763	575.836986768991	478.578390786424	124.263061443344	466.146996011958	88.6189907323569
ADGRG4	148.272212827578	822.649106150493	996.261689346284	86.8542846292257	934.753125300631	879.068117821589	126.856012968346	106.65086703375
ADGRG5	425.787867046893	526.795930229127	676.427214639261	55.3870042786002	972.197231138125	770.072310464457	347.089441260323	458.089853171259
ADGRG6	515.158851630986	145.919786999002	825.451412238181	513.036330696195	186.06715137139	121.240159729496	794.005679665133	143.882349599153
ADGRG7	554.482418112457	175.761370919645	753.526448039338	994.423645548522	822.174100205302	553.55239729397	410.902093863115	298.359764739871
ADGRL1	182.202959898859	517.336978344247	468.451518565416	450.907588703558	69.8640635237098	222.661593463272	106.775710359216	403.207393363118
ADGRL2	354.682549135759	180.107621476054	3.07952240109444	804.327242309228	945.781677030027	767.428451916203	86.4424689207226	70.2905086800456
ADGRL3	618.552166735753	367.748161777854	737.956470577046	473.130273865536	557.247082935646	960.260984255001	352.449569152668	655.871007591486
ADGRL3-AS1	5.21439127624035	410.92948615551	446.317626163363	84.7025453113019	851.215571397915	14.0984700992703	865.958141628653	905.559522332624
ADGRL4	749.672857113183	810.617247130722	736.830711364746	39.3835238646716	78.2395298592746	640.73020615615	860.489088576287	771.353371208534
ADGRV1	862.204434582964	569.831662811339	65.7507260330021	108.20722905919	997.894907137379	915.045505622402	800.196345197037	309.541056863964
ADH1A	982.86909610033	515.096179908141	79.9659639596939	113.119304412976	463.922776747495	258.31732689403	386.112592183053	249.450991861522
ADH1B	361.770962364972	122.905817115679	605.801844038069	609.74435089156	857.182167936116	369.717609370127	395.541113801301	305.533388862386
ADH1C	47.2689871676266	629.741910845041	864.553859923035	418.753643520176	130.362109746784	343.350201379508	816.782146459445	880.557116819546
ADH4	962.889834539965	303.922682302073	324.24851320684	521.852120757103	341.091995825991	662.713201483712	95.8283571526408	645.227040862665
ADH5	79.538561636582	371.510414173827	448.982272529975	884.933437220752	101.843026001006	642.718380782753	116.290754405782	534.879548475146
ADH6	287.252778420225	970.866545801982	19.1229830961674	833.9066603221	544.254561187699	760.266728699207	642.58716092445	182.93613451533
ADH7	812.185284681618	821.55464659445	851.076610619202	0.204667216166854	24.478797102347	506.881877314299	725.928399479017	688.377522630617
ADHFE1	74.8748572077602	328.158220509067	448.911589337513	524.623561883345	590.539845637977	746.531960787252	81.7031988408417	402.966359863058
ADI1	752.506387652829	51.5939081087708	4.04581124894321	420.088650425896	714.665386127308	422.775906510651	762.47411291115	540.606807917356
ADIG	157.130196224898	566.724501317367	280.133619438857	655.406897189096	796.81631620042	577.554089482874	460.929880384356	552.738758269697
ADIPOQ	207.069510128349	121.364573482424	954.307708423585	80.7649979833513	387.232183944434	226.40326526016	525.832844199613	452.956780325621
ADIPOQ-AS1	181.332367938012	193.507338641211	111.200829502195	19.1710125654936	300.472053233534	277.963322820142	293.76083612442	989.245155127719
ADIPOR1	945.20599488169	421.15652281791	935.636036330834	324.76017717272	893.238896504045	352.555182529613	158.532768720761	726.21460352093
ADIPOR2	739.81849825941	913.681264733896	329.123792238533	923.272867687047	185.028294799849	56.0946215409786	307.423563674092	805.239835055545
ADIRF	770.344942575321	114.515922032297	224.358238745481	884.26191569306	136.95101859048	89.0021210070699	522.517051082104	583.20878748782
ADK	899.301202502102	976.349986158311	360.998288262635	888.859190279618	275.730363326147	253.980667795986	37.2233535163105	73.8680246286094
ADM	318.839982151985	128.720211097971	27.3283272981644	753.433635924011	953.306386945769	303.240875713527	668.279659701511	500.17895642668
ADM2	733.00307104364	575.455368030816	122.408520895988	226.886472431943	825.881769647822	872.97261506319	27.345517417416	138.769712531939
ADM5	450.391814345494	397.391239413992	996.325618121773	510.310096666217	49.3676324840635	478.166203247383	601.773450616747	304.440894629806
ADNP	425.731476629153	431.882507167757	225.315039744601	89.0129015315324	34.6658786293119	551.373781636357	863.163109868765	518.508791457862
ADNP-AS1	83.1554362084717	696.146609727293	518.718447769061	953.798280563205	222.487341146916	527.677180245519	341.105058090761	117.763992398977
ADNP2	278.106848243624	341.377238743007	385.319165885448	137.83748797141	478.657537838444	324.869115836918	727.244738256559	886.233153287321
ADO	617.024699924514	974.431124748662	542.50772879459	426.967737497762	955.690647475421	942.110345466062	288.2119435817	520.822553429753
ADORA1	746.274316683412	205.936441896483	106.816978892311	715.028752107173	226.568210637197	806.932284729555	587.499814340845	713.946053059772
ADORA2A	392.299683298916	102.95962379314	281.637546839193	491.822397103533	442.154323216528	26.2653368990868	269.390121102333	516.403558664024
ADORA2A-AS1	878.292215289548	854.890629416332	784.479863708839	821.26626605168	648.042690707371	699.396332493052	464.779592351988	305.758742848411
ADORA2B	918.408811325207	1.52529939077795	711.761690676212	715.993358520791	71.3706715032458	260.085520800203	523.960894905031	451.177810784429
ADORA3	800.500499084592	53.6544460337609	967.282570200041	812.088997103274	21.2092401925474	88.6481301859021	918.077332666144	572.978798765689
ADPGK	554.581379285082	4.00899071246386	692.953074583784	428.860454820096	176.175283035263	877.019466133788	380.21520152688	555.450859945267
ADPGK-AS1	57.323349872604	545.233049429953	221.194616518915	240.514428121969	308.013110887259	100.760114379227	773.487797938287	274.953422602266
ADPRH	33.9280935004354	437.893878668547	428.817199543118	262.409427203238	646.078220568597	956.76545589231	537.959483452141	805.832652607933
ADPRHL1	740.137127228081	553.53201017715	878.004598198459	84.7751933615655	475.573035888374	916.848108638078	353.098556399345	16.3972119335085
ADPRHL2	867.038411088288	409.995489288121	47.5176109466702	754.843168426305	69.1430156584829	700.928632169962	825.374759035185	751.253395108506
ADPRM	816.394606605172	239.734015194699	692.140095867217	104.356218129396	43.6000844929367	316.62746751681	214.723460841924	30.8036478236318
ADRA1A	290.347691858187	299.971487373114	108.264226000756	224.575303029269	352.967608254403	727.812811965123	588.815081631765	665.440092328936
ADRA1B	750.301086110994	475.782063556835	528.476594015956	23.728406522423	120.792760746554	746.952190762386	523.099770536646	906.772730173543
ADRA1D	997.513914015144	655.736804241315	553.10692358762	127.901222091168	546.679726568982	972.603294532746	635.097705759108	757.137780776247
ADRA2A	192.591315601021	469.916726928204	533.005971228704	651.011111214757	6.95739034563303	985.682867234573	944.532204419374	864.505626028404
ADRA2B	854.505236726254	537.083663977683	551.538807107136	942.412152420729	72.1328996587545	198.929324978963	163.306032540277	676.053493050858
ADRA2C	781.294690910727	236.544168321416	734.490847913548	775.114792631939	379.950105911121	152.381830848753	604.528580559418	59.5714915543795
ADRB1	304.321160539985	812.37867847085	352.009566035122	836.195098934695	396.176839014515	485.528333578259	31.0636174399406	40.459870826453
ADRB2	289.317599963397	658.665252150968	562.264481559396	361.308548366651	500.232194550335	696.025576209649	378.920667571947	560.847859131172
ADRB3	408.058918779716	47.1222591586411	179.976650280878	970.066358568147	612.213085172698	682.407554471865	456.070870859548	783.084127353504
ADRBK1	442.907945485786	780.940919648856	80.5998637806624	108.74890955165	326.205831719562	867.164484923705	963.94467796199	809.433055110276
ADRBK2	571.155444486067	757.239737547934	711.790082976222	242.108297999948	923.387158662081	896.718326257542	253.143061185256	23.0926258955151
ADRM1	616.978554986417	301.47133837454	362.68041562289	93.1798361707479	658.077896106988	220.359655329958	844.086224678904	682.684137718752
ADSL	209.368914132938	856.980674434453	818.502664798871	424.440772505477	144.468121230602	351.901445537806	51.7126997001469	927.610490238294
ADSS	50.4895288031548	809.939339989796	32.3910361621529	716.850250726566	401.168901706114	292.339776642621	77.4507401511073	423.926556715742
ADSSL1	231.31857579574	232.086656847969	518.515130970627	747.066930867732	419.012671336532	423.870731610805	336.083534872159	985.050485702232
ADTRP	765.083122765645	320.258434629068	468.393406830728	486.453688004985	642.409257125109	781.027509830892	768.830742919818	238.449427066371
AEBP1	969.255679752678	71.7096473090351	207.509604748338	778.942201286554	340.712618315592	350.459538633004	410.774224670604	567.059446591884
AEBP2	157.92926074937	383.183187339455	364.087838213891	451.015820726752	655.106786638498	724.39875244163	565.927650313824	306.126788724214
AEN	221.915865782648	165.379756595939	811.693188734353	370.490628760308	480.799181619659	242.994820699096	494.393559871241	264.878207352012
AES	993.216735776514	248.179611982778	323.536881711334	243.60702233389	536.193403182551	995.091100223362	758.901314577088	398.450372274965
AFAP1	850.834448821843	630.731313256547	789.53847521916	138.857018202543	457.593114348128	185.343388700858	605.991798918694	795.926935039461
AFAP1-AS1	279.385930858552	849.989211186767	398.30147405155	445.440537296236	314.29349607788	774.927727645263	228.198228636757	40.9286594949663
AFAP1L1	345.242636976764	624.76192926988	61.8701952043921	45.599763514474	557.935645803809	954.485879978165	874.483367195353	481.771508231759
AFAP1L2	139.853794593364	882.277014199644	702.526161912829	432.14242067188	930.332725867629	104.488356504589	981.361205456778	751.050523947924
AFF1	777.009362354875	219.947638688609	65.070656593889	882.137356093153	625.227503245696	167.725821491331	986.286687897518	485.450961161405
AFF2	745.100314961746	118.590954691172	191.370589658618	938.570134574547	185.939613264054	111.570825334638	600.010470952839	549.222813919187
AFF3	501.584679353982	500.522836809978	308.879225281999	355.702617205679	813.07518016547	980.290880659595	739.101901184767	545.701505150646
AFF4	969.592392444611	220.11852520518	484.007775085047	259.139181580395	323.241949314252	885.173814138398	665.294004138559	885.859969770536
AFG3L1P	79.5599052216858	730.119193438441	98.1724748853594	578.186714090407	796.377942664549	765.307063702494	259.900416014716	90.4081475455314
AFG3L2	616.307507036254	598.480567103252	168.351725209504	978.439276805148	746.377234579995	46.715181088075	741.558707784861	753.039578907192
AFM	774.780517444015	113.763634581119	44.4654754828662	182.930396404117	470.951778814197	279.119673417881	90.3834737837315	567.168693756685
AFMID	212.209834950045	378.450888209045	790.857297834009	804.584958357736	735.579384025186	392.1892803628	661.996325710788	748.905236832798
AFP	836.796848103404	917.521878378466	532.457399182022	933.725383132696	594.251388916746	619.659475283697	467.091268394142	397.39956217818
AFTPH	14.5423493813723	69.0353640820831	942.879325943068	379.610188305378	950.565146980807	728.44336181879	271.423769183457	322.685928782448
AGA	624.262944562361	267.245383933187	650.271940976381	326.141613535583	659.871922573075	678.301262902096	876.427690731362	130.977915134281
AGAP1	824.336175341159	89.0124216675758	317.620667163283	376.484803622589	327.827415429056	592.983440496027	946.143596898764	310.549225192517
AGAP1-IT1	766.772151226178	276.460907189175	343.391801230609	868.600621121004	835.579750360921	985.272233607247	321.033462649211	730.832481989637
AGAP11	332.775383023545	425.43985764496	20.164497429505	53.743991535157	291.160182794556	727.172350976616	786.91013273783	147.369736107066
AGAP2	344.905532198027	495.911893434823	523.6975713633	621.344275539741	619.501202832907	413.276335690171	236.21292039752	331.609170185402
AGAP2-AS1	752.257705666125	346.937797032297	148.298491723835	650.431738700718	820.873562246561	69.8637731838971	264.025800628588	688.997182995081
AGAP3	86.2681192811579	529.717915924266	60.1264305878431	876.099249580875	431.299814255908	626.562173478305	399.99855030328	54.6729483176023
AGAP4	759.08018485643	950.228787027299	231.925045372918	148.70388363488	107.256957096979	644.533922662959	732.984470902011	962.629752932116
AGAP5	208.554435754195	186.332301003858	210.922917816788	437.567884568125	582.289118086919	225.431910250336	888.553587952629	161.49841924198
AGAP6	302.57064383477	610.862897941843	873.221880756319	276.876432355493	510.046679293737	905.825609574094	985.765752149746	623.027450870723
AGAP7P	973.424170399085	426.044260151684	933.407204691321	554.136844817549	834.933902369812	47.1660655457526	789.470977382734	820.054545300081
AGAP9	943.474272731692	194.991998840123	790.551338577643	445.168237201869	369.22338581644	263.370474334806	652.908257674426	452.548851957545
AGBL1	504.467618651688	373.520005960017	609.07921474427	803.420880343765	38.4595862124115	566.645407350734	544.782130047679	884.163142181933
AGBL1-AS1	693.934019189328	183.814592892304	525.790327927098	773.67748436518	171.584996394813	329.969633836299	557.271609548479	324.058251222596
AGBL2	47.1951076760888	865.109126782045	980.110654374585	245.739886304364	843.929891707376	903.80772179924	300.040596164763	775.398380355909
AGBL3	420.489905867726	563.702611019835	256.798387039453	375.57181250304	569.523653946817	286.841717548668	855.068919016048	275.651634670794
AGBL4	331.359207862988	840.398990549147	580.696787219495	995.058511849493	833.392600063235	64.7746485192329	197.682108730078	80.0967258401215
AGBL4-IT1	322.679903591052	247.144708642736	346.987263998017	73.0035896413028	95.6532633863389	393.446112750098	678.488775389269	521.890951087698
AGBL5	172.284675994888	825.232065515593	964.0777700115	901.849303161725	142.18916115351	398.515369510278	946.692359866574	337.790739256889
AGBL5-AS1	754.371402319521	274.174781283364	229.463662952185	771.099994657561	821.520891739056	756.598351057619	689.089074265212	926.872664596885
AGER	643.772366223857	176.946899387985	796.844730852172	11.6344362031668	441.951104672626	414.342352654785	397.593453526497	271.667098626494
AGFG1	264.138232916594	592.470561387017	90.622074669227	892.617372330278	928.694624686614	99.5753805618733	534.828998846933	529.045078670606
AGFG2	711.981878150254	406.382044078782	170.086376136169	538.706911029294	910.134901525453	184.812942519784	806.751929223537	971.235548844561
AGGF1	718.916427111253	372.31815722771	453.543807379901	962.339980062097	2.70165037363768	365.502500208095	711.001549148932	433.740189066157
AGK	260.373171186075	924.526000162587	375.507448567078	818.296654615551	560.379767324775	908.722364576533	743.861975846812	802.442421205342
AGL	927.119641331956	390.078140189871	306.602463359013	815.256820525974	172.210553428158	816.737254150212	253.638553665951	420.52885517478
AGMAT	429.673930397257	368.439717916772	410.651474492624	762.105530593544	922.285102540627	662.24733972922	555.112663889304	6.05853809975088
AGMO	886.740412097424	803.173218620941	63.3199859876186	741.533215390518	603.414142969996	188.756306422874	539.805524982512	369.862983934581
AGO1	534.939480479807	993.83662850596	446.926643140614	447.687303414568	97.3421211820096	169.272308703512	924.440077040344	208.230422576889
AGO2	242.049895226955	862.553719198331	207.131506875157	134.009283268824	324.928741669282	28.3080672379583	163.999037817121	384.242548141629
AGO3	715.631320141256	507.218666141853	259.154673898593	190.041191643104	195.743007585406	667.976728640497	462.839388055727	32.1993730030954
AGO4	790.591045748442	599.752079928294	426.817416911945	14.708329224959	156.789696309716	638.037326280028	350.177679210901	468.500494258478
AGPAT1	140.316339209676	739.363233558834	789.081492926925	25.0039470847696	263.770975871012	651.341503718868	336.630797479302	887.265799101442
AGPAT2	996.948591200635	273.494879947975	362.876446219161	69.9060407932848	525.943893939257	629.182975972071	627.520521404222	461.464699823409
AGPAT3	606.028093025088	34.1890489216894	787.113804835826	64.8310545366257	34.7363417968154	593.082593055442	985.194929875433	878.160119289532
AGPAT4	266.647847369313	91.7610782198608	199.841428548098	62.0737134013325	620.124663924798	246.993613662198	629.92673041299	603.480057790875
AGPAT4-IT1	606.047886423767	617.037431336939	993.782754288986	889.527344610542	3.5215753596276	930.484099313617	234.23313931562	644.27083125338
AGPAT5	438.764816615731	243.297182023525	45.1126084662974	295.282352250069	29.3831203598529	383.518818765879	937.027745414525	181.486257351935
AGPAT6	379.410006804392	703.472048044205	724.103366490453	560.370107414201	694.779435405508	174.608641536906	233.48602373153	370.025095529854
AGPAT9	862.729996209964	923.895661719143	387.88800034672	461.909192381427	710.579560138285	714.960245415568	368.249302962795	495.879322290421
AGPS	322.066778549924	536.33904340677	511.080753523856	563.678235048428	99.7029824648052	601.931806420907	418.143182760105	108.298156177625
AGR2	467.81708067283	117.454022169113	741.885805269703	853.015435859561	388.544988352805	217.769241193309	537.17292426154	910.842830780894
AGR3	994.845319539309	934.01219882071	423.489292617887	17.5893676932901	513.116877526045	940.501058241352	556.907759513706	992.427496705204
AGRN	178.539540851489	436.463048914447	895.263121696189	117.384385550395	87.8473410848528	928.95715101622	161.714455811307	604.562728200108
AGRP	349.652341334149	377.029475290328	12.5586949288845	83.5718065500259	506.920272950083	363.775126170367	874.072597362101	942.509521264583
AGT	416.797797428444	684.355201665312	692.487149965018	706.299606477842	201.682404847816	909.879301209003	400.960249826312	639.049135614187
AGTPBP1	381.766422418877	899.061233503744	870.904664508998	41.2183196749538	959.64050013572	217.910131439567	215.958286309615	262.030953541398
AGTR1	642.720700474456	417.075186502188	453.104863874614	679.165710462257	490.837749792263	768.902092939243	422.900686971843	905.234895879403
AGTR2	945.744881639257	756.809198530391	288.307002047077	518.116166582331	589.313270756975	604.323266772553	408.771337941289	496.717706555501
AGTRAP	386.575259268284	588.945562718436	729.925728403032	81.3123916741461	634.616643656045	907.252534059808	470.160512486473	504.555466584861
AGXT	885.008747689426	854.298629565164	186.254272470251	990.193463861942	380.064618773758	27.5797348003834	945.042569190264	368.511734297499
AGXT2	919.199602445588	149.207570357248	597.448111744598	376.788092311472	60.1931728888303	232.618432026356	406.985060544685	676.789544522762
AHCTF1	951.088606612757	552.494500298053	699.083867948502	833.32123234868	174.678499111906	211.39359427616	491.581276291981	810.399472946301
AHCTF1P1	382.823408115655	242.144580231979	121.916699456051	827.51191360876	610.428230371326	120.895058847964	60.0675090681762	257.337441202253
AHCY	826.206847093999	375.258313957602	241.426488850266	423.151427414268	642.846236936748	593.372873496264	807.705002604052	586.515008239076
AHCYL1	751.177126541734	334.1221192386	849.309566430748	533.107850933447	850.736240623519	967.037599533796	264.175459742546	270.234170835465
AHCYL2	187.008702429011	648.483351804316	974.353360477835	738.907071296126	837.747374549508	432.370373047888	754.443502984941	753.846857929602
AHDC1	799.559661885723	251.089213881642	928.280498599634	666.351990075782	605.076256440952	963.728293776512	336.63449739106	988.691906444728
AHI1	422.415585257113	451.894525904208	654.750898713246	669.674776960164	350.018199300393	565.139739774168	491.93263053894	731.559201376513
AHNAK	246.512210229412	512.854299042374	128.908600658178	481.823569862172	124.791542999446	113.21308161132	473.840742371976	238.689447985962
AHNAK2	29.5124226249754	777.658798033372	865.681126713753	464.582498185337	313.989104703069	78.0801807995886	379.328405484557	555.935891112313
AHR	987.363660475239	153.551642782986	783.114470541477	39.1770619899035	341.028061928228	816.950870910659	802.713749464601	876.273315865546
AHRR	656.346129486337	133.992349263281	116.162769962102	805.995350005105	298.596570035443	380.507228663191	959.901644149795	601.220397511497
AHSA1	679.103909991682	917.545491363853	112.080625724047	886.031683068722	291.244270745665	184.372812509537	809.566381853074	512.921756831929
AHSA2	913.301607826725	72.2479426767677	987.876937491819	918.827002402395	772.051264764741	142.954010749236	429.114184342325	290.887758135796
AHSG	903.692769119516	125.221932539716	802.78992978856	564.91952505894	808.852013899013	598.032580455765	139.218365773559	1.18630984798074
AHSP	857.159644598141	371.751515660435	41.9682918582112	730.149582726881	598.606920568272	244.336082367226	490.279612131417	410.129722207785
AICDA	149.088503792882	621.689226478338	267.780845286325	916.678975801915	587.342437589541	240.884729661047	651.925158919767	929.823858430609
AIDA	945.219737011939	181.974188657477	447.493429062888	359.7137699835	73.6497440375388	123.284545494244	374.76263102144	922.855705022812
AIF1	931.456891587004	352.015695767477	384.184011258185	854.984951671213	840.651101898402	447.12700904347	156.161710852757	526.814508251846
AIF1L	681.803284911439	375.023818342015	909.09988572821	971.243905834854	503.136778250337	921.761251753196	809.751898981631	361.076914472505
AIFM1	245.947115123272	941.52064435184	721.702616661787	596.069540129974	713.509286521003	239.52893493697	508.04121280089	306.30410159938
AIFM2	558.335416484624	751.591217936948	499.200903344899	93.1114312261343	438.334974227473	225.307356799021	134.372024331242	901.919945841655
AIFM3	352.988515049219	248.480660375208	527.412265306339	496.076202718541	897.913589375094	204.780787695199	870.372116798535	428.936150157824
AIG1	219.722278416157	784.099824493751	212.815490784124	522.876439383253	127.434591995552	473.025542218238	85.7598164584488	481.853974051774
AIM1	970.002857036889	732.875213492662	717.131593730301	298.4803696163	583.882410544902	622.664045309648	626.057631801814	205.373764503747
AIM1L	563.94393183291	281.973210396245	456.263757310808	10.7404463924468	764.042196096852	211.121030617505	934.051140444353	225.328104803339
AIM2	622.003024676815	385.079530300573	543.505292385817	178.86503203772	154.961624881253	12.6948186662048	275.778482668102	790.896219667047
AIMP1	463.258735602722	92.4209908116609	96.910405671224	858.742421725765	254.523074021563	245.120367733762	65.0206177961081	325.03400859423
AIMP2	0.431421212852001	785.809873836115	813.5498422198	131.196724250913	272.674113512039	164.506696397439	963.197881355882	983.004367677495
AIP	697.218913584948	933.091488434002	953.92576768063	228.407080518082	228.499413933605	153.973630163819	328.547810902819	907.17716794461
AIPL1	544.85461791046	611.786121269688	205.589516088367	151.680540060624	24.4222583714873	388.590547489002	642.818877706304	276.091889943928
AIRE	686.354899778962	752.498472109437	535.950229037553	12.9866874776781	986.434231046587	906.27333172597	252.773077925667	510.58033388108
AIRN	643.626673379913	624.778109136969	569.522101897746	482.641892973334	776.345584541559	836.104094982147	429.387701675296	838.643147610128
AJAP1	85.5081474874169	15.8445006236434	557.529251091182	279.446166474372	803.891938878223	325.58451872319	730.331178056076	170.331641100347
AJUBA	252.616261364892	546.239315997809	288.520663278177	508.327338844538	119.846075540408	723.731716629118	121.164841577411	75.4564644303173
AK1	273.610351840034	817.870418075472	405.273817013949	538.685035193339	517.467540455982	158.866083016619	611.579087330028	462.97462284565
AK2	813.527378952131	215.667853364721	90.204986743629	888.996469322592	497.310489183292	762.484522303566	250.502476003021	340.148817515001
AK3	489.476286107674	627.720016753301	73.903686599806	781.291258987039	668.129209661856	397.838047007099	36.6531603503972	28.0688258353621
AK4	873.630029382184	990.545035572723	995.961727341637	731.029198272154	449.383611790836	618.08781302534	77.8352885972708	999.480440746993
AK5	236.84884281829	968.680277932435	549.947282765061	479.139051865786	429.676304571331	110.242138151079	975.24448344484	731.468818383291
AK6	922.082218341529	809.711402049288	462.576235411689	5.63129084184766	335.58683283627	552.403593435884	795.217159669846	454.889036715031
AK7	912.605626508594	174.948867876083	927.800251636654	306.619640672579	137.975630350411	479.942387435585	948.540906654671	429.660155903548
AK8	604.065392864868	289.516200544313	204.983030911535	464.56007566303	522.226657951251	894.963149679825	490.902464604005	149.79469566606
AK9	657.031772192568	876.343851676211	395.956249674782	940.433516632766	290.063387481496	654.777348041534	265.954909613356	139.331846497953
AKAP1	936.950284289196	813.844203017652	196.907219244167	928.382996236905	374.510554829612	447.202503681183	253.514141077176	674.444287782535
AKAP10	196.505077416077	113.158432766795	179.13870094344	760.38526580669	402.609763201326	261.556611629203	53.6295245401561	237.339343177155
AKAP11	179.211082402617	860.519982874393	105.875494889915	799.967834493145	304.619294591248	404.531754553318	685.34159520641	549.306571483612
AKAP12	949.90869006142	676.331570604816	529.809704981744	854.265936184675	976.374313933775	798.552681691945	587.757069384679	441.29492668435
AKAP13	502.398945624009	378.252284135669	665.579684311524	692.214636132121	791.683867340907	525.396082550287	760.223598219454	166.798061225563
AKAP14	622.795898467302	351.033221697435	255.02531719394	249.883720418438	841.519010486081	33.4290626924485	904.603699687868	978.522139601409
AKAP17A	716.801262460649	468.827746808529	539.387712953612	520.394235383719	474.223351338878	961.642782902345	855.86964036338	915.12454720214
AKAP2	986.802329774946	744.790476979688	54.3286520987749	108.014253433794	298.21388120763	86.8035138119012	641.318049514666	945.573930395767
AKAP3	426.597684621811	613.965724594891	508.537379093468	616.084706736729	318.297888385132	161.55868745409	57.1497951168567	575.436818646267
AKAP4	289.05610111542	802.868778118864	458.129269536585	383.374196477234	803.283493267372	172.849899623543	778.327806387097	14.0933573711663
AKAP5	626.627100165933	907.107051927596	483.916114317253	296.606860589236	216.58849879168	632.877670926973	82.6536391396075	86.9265920482576
AKAP6	348.977363202721	624.548518797383	23.8797690253705	90.4065587092191	168.350568274036	123.892724048346	606.185328913853	381.44923816435
AKAP7	876.333877909929	533.3473153878	393.319942057133	327.290038345382	336.501820012927	941.963875899091	823.566045146435	992.053642403334
AKAP8	326.911416603252	788.869764422998	175.104666501284	969.079272588715	393.267432460561	359.80147565715	835.273222299293	801.009936723858
AKAP8L	33.4858461283147	505.858924938366	793.437213869765	907.968275249004	97.8555066976696	209.197781980038	893.576683709398	685.609437758103
AKAP9	32.4468740727752	952.51511153765	445.602976251394	698.603609809652	397.398719098419	850.732862250879	366.897472413257	553.518902976066
AKIP1	521.005370188504	181.233976501971	627.761410549283	396.160566015169	721.18160687387	567.941055400297	586.706678615883	481.37635900639
AKIRIN1	337.796561652794	881.069287657738	991.152547067031	296.056797960773	451.845913426951	713.593320222571	658.430837327614	176.944377133623
AKIRIN2	973.787053488195	625.059862621129	95.2494335360825	835.870667826384	367.734652711079	891.987821552902	115.069030085579	1.19966780766845
AKNA	478.874758584425	210.770718986169	330.821279902011	256.348538445309	828.085578978062	467.472810298204	857.205020729452	727.259423816577
AKNAD1	529.149539070204	242.160006659105	743.824495701119	592.143538873643	505.380467511714	310.779571533203	511.22661284171	549.769104225561
AKR1A1	976.214021444321	664.264197926968	450.572145869955	964.455351466313	139.452992007136	727.722266456112	767.765233991668	837.627119151875
AKR1B1	119.623788399622	378.841422265396	389.54770937562	212.28250907734	729.018533136696	725.894197123125	258.236880181357	281.109340023249
AKR1B10	182.361591607332	965.136732440442	346.721353940666	807.791817234829	852.997118141502	236.943936208263	710.433744592592	323.213859694079
AKR1B15	132.08126835525	633.508623577654	258.015564875677	564.543938264251	924.931133165956	487.294089281932	732.979897409678	296.060926048085
AKR1C1	529.816886642948	919.674875447527	282.196890795603	333.884933963418	399.338049814105	738.336979178712	786.949040368199	238.745145965368
AKR1C2	538.778019836172	350.254989927635	319.052847102284	16.582002164796	709.321613190696	173.771135974675	751.894122455269	951.648077229038
AKR1C3	298.742592101917	156.010382110253	47.5134835578501	820.291013456881	894.897306337953	448.58325785026	304.429818876088	763.032775139436
AKR1C4	547.141748014838	784.911784809083	251.052789390087	156.339410692453	259.317129617557	529.442506842315	587.916092714295	626.805643551052
AKR1C6P	690.426104003564	255.787990987301	977.571660885587	661.87204956077	587.33510854654	545.663298340514	304.169047158211	695.032052462921
AKR1C8P	878.205195767805	182.645312510431	141.852021450177	126.71601655893	592.854367103428	452.945300610736	32.3099137749523	844.056867063046
AKR1D1	744.248032104224	598.155767889693	941.537006990984	451.235136017203	355.443768436089	551.748213125393	509.941069409251	891.50892291218
AKR1E2	385.902960086241	280.187972122803	942.825630307198	43.7335160095245	733.092566020787	267.982286168262	222.405921202153	424.354368820786
AKR7A2	325.026595965028	401.944667100906	342.439075931907	486.890689004213	763.142925221473	581.814340082929	237.548333359882	648.85805407539
AKR7A2P1	127.397231757641	106.56155180186	618.036519968882	125.180438160896	802.765233675018	929.346318822354	509.042653953657	983.080766629428
AKR7A3	901.953375665471	894.238515291363	490.952683147043	331.116329412907	773.939582984895	8.45299032516778	765.588079113513	77.1563770249486
AKR7L	242.881275014952	570.804637856781	249.585167737678	694.382985122502	288.949402980506	701.732339104638	129.749329993501	390.48099773936
AKT1	535.162475192919	911.078953649849	285.055309301242	729.195291409269	548.239756375551	948.543517617509	974.104236112908	805.961365811527
AKT1S1	987.948711728677	538.476799149066	180.737469345331	649.846913525835	206.857229815796	295.288120862097	225.580016849563	521.529903169721
AKT2	729.481370653957	727.199513930827	90.6549296341836	443.254502490163	685.503992484882	46.2957164272666	495.56458950974	540.112148970366
AKT3	739.679967751727	325.595872942358	745.198932942003	612.76018503122	261.395948240533	833.86176195927	405.540388077497	688.72364773415
AKTIP	47.9985931888223	722.568805329502	827.379514463246	805.065699853003	165.299585554749	133.100680308416	682.731810724363	934.855612693354
ALAD	912.821895442903	151.608938118443	100.49480618909	993.298735236749	898.778373375535	404.445059597492	730.843325145543	462.830340955406
ALAS1	581.250687129796	769.59441229701	233.680137665942	344.924584031105	734.290921362117	634.045255836099	584.271074505523	491.049573756754
ALAS2	133.667001733556	793.871241621673	182.447794824839	654.974860139191	37.5174670480192	5.98305347375572	396.33467933163	973.209308926016
ALB	7.04580429010093	852.877234574407	676.231964956969	752.132082823664	8.73402040451765	774.372066836804	94.2871831357479	683.149607153609
ALCAM	827.443600865081	383.952164789662	296.906517585739	728.737713303417	668.235314777121	276.162138907239	344.974370440468	150.236111134291
ALDH16A1	391.851397464052	11.1108073033392	80.6115299928933	847.610565600917	888.748473022133	614.615448750556	769.02970043011	478.125213878229
ALDH18A1	286.14828758873	959.864317439497	390.460850205272	525.843850336969	156.72194538638	75.6448321044445	297.157255001366	97.6492967456579
ALDH1A1	236.129689030349	73.4890617895871	670.901565812528	673.763156868517	737.814855296165	928.059891564772	752.260276116431	380.463512381539
ALDH1A2	478.283705655485	506.258034612983	501.668378943577	745.423679472879	445.226368494332	545.193258672953	804.052348481491	120.023804716766
ALDH1A3	625.25084731169	249.334606342018	27.9376201797277	670.18800158985	170.88862019591	531.900832429528	213.210684480146	692.519563715905
ALDH1B1	257.770867552608	977.419590344653	60.2525158319622	238.726370735094	828.884026966989	33.5269400384277	113.363304641098	663.359044119716
ALDH1L1	163.356848526746	306.2906737905	348.139970563352	184.052629163489	662.117914529517	672.954440815374	20.9102900698781	837.205286836252
ALDH1L1-AS1	552.15776595287	656.361954985186	203.853808576241	402.627445291728	791.353448759764	373.492986895144	743.547974852845	556.836368283257
ALDH1L1-AS2	33.7101181503385	393.794430885464	571.487943409011	976.171480258927	857.847284525633	577.587731415406	636.152402963489	704.819769365713
ALDH1L2	949.881098698825	334.069860167801	827.08735531196	378.814592491835	890.987903112546	249.939219793305	591.982055455446	503.584819147363
ALDH2	156.583953881636	955.425351392478	632.459189975634	389.526094542816	18.8499353826046	502.256845124066	553.268600720912	553.732182364911
ALDH3A1	671.799711883068	515.147633384913	789.835242088884	275.270759593695	519.650640664622	694.660084787756	245.127203175798	458.807193674147
ALDH3A2	727.10361587815	151.229534298182	691.658282186836	433.711644262075	362.251261714846	293.798036174849	340.941354632378	324.470199644566
ALDH3B1	92.6810463424772	580.645002424717	924.632766051218	155.691038351506	717.248088447377	790.434802183881	811.812466243282	131.897502113134
ALDH3B2	856.155502842739	737.356166122481	831.282559083775	946.890874532983	540.438697906211	182.272389065474	757.12145678699	548.689877148718
ALDH4A1	961.316546192393	697.511664126068	282.594349468127	806.440709391609	919.194870861247	436.905703973025	796.647512819618	346.928745275363
ALDH5A1	306.327364873141	786.809620447457	456.401447765529	616.807846119627	695.375911192968	245.161547558382	420.228662900627	611.794779775664
ALDH6A1	670.8099686075	436.000487068668	664.200827945024	51.2588808778673	703.981465892866	74.3994386866689	111.502829240635	324.87225998193
ALDH7A1	839.07913393341	555.218311492354	408.829510211945	476.188108557835	203.270464669913	148.895794525743	448.836996685714	829.733982449397
ALDH8A1	556.314571993425	579.145095776767	803.402235265821	770.124673610553	405.98434349522	502.357703866437	809.136498952284	90.3953155502677
ALDH9A1	753.952055238187	343.495588516816	571.608596481383	794.919574167579	721.755220554769	971.8500636518	313.885030336678	526.461311616004
ALDOA	819.323766743764	789.689683588222	951.061579864472	68.9759063534439	442.775850649923	884.198907064274	491.144106723368	656.511327018961
ALDOB	677.239105338231	698.955089086667	894.380637444556	575.288164429367	976.355485152453	397.575619630516	66.7743484955281	802.979882108048
ALDOC	793.055845191702	979.913535295054	671.404214808717	667.772047454491	538.858289131895	127.018885454163	373.063919600099	159.034576034173
ALG1	98.0602346826345	657.898744568229	88.6931114364415	506.975116441026	158.469202695414	887.199292657897	878.162631532177	645.572473527864
ALG10	16.5797984227538	413.303482113406	383.161030942574	469.188925577328	894.813002552837	501.895235152915	133.578727487475	627.626187168062
ALG10B	812.53864010796	661.880629369989	737.581950845197	690.799011848867	708.942581899464	910.013063345104	371.15920195356	210.028738481924
ALG11	930.057692574337	276.625741738826	786.230862140656	474.633113481104	570.103412959725	331.063475925475	948.476990684867	572.188912658021
ALG12	520.235641626641	747.100187698379	442.54830502905	796.357995830476	954.037246061489	981.308706570417	522.174557903782	953.904045978561
ALG13	926.748283440247	300.550090381876	638.524300185964	7.06083606928587	866.424137493595	230.846641585231	121.343919774517	510.169363347813
ALG14	65.0384400505573	552.617101697251	669.649799587205	449.202961986884	214.33656476438	69.7900527156889	12.3272561468184	381.730201654136
ALG1L	131.626511458308	379.752920009196	280.247601913288	108.127280138433	331.739648245275	416.854160604998	851.460269652307	648.326355498284
ALG1L2	826.155004324391	911.786541575566	221.931163687259	506.905837915838	873.466646298766	683.466157410294	37.6578816212714	485.796695575118
ALG1L9P	769.083369988948	307.389351539314	19.0926410723478	640.675809932873	55.236553773284	16.663572518155	93.3012277819216	717.295275069773
ALG2	144.880144391209	408.949152799323	119.080887641758	683.482054620981	876.429330324754	211.86703722924	289.253351511434	181.120968190953
ALG3	352.163284318522	807.436241302639	945.125699741766	942.363851703703	772.627986967564	314.25291672349	579.315069131553	766.178208403289
ALG5	994.93917147629	506.036767270416	493.580030743033	544.95410528034	70.818837499246	511.908491374925	522.724594920874	509.573674295098
ALG6	769.507099175826	259.00205061771	844.242716673762	779.02956889011	139.167021494359	181.2600241974	297.334840521216	237.62241168879
ALG8	367.84330313094	102.43880120106	648.642229149118	876.029530074447	754.35726554133	827.436251798645	496.29242438823	11.4760352298617
ALG9	512.121591949835	34.2705675866455	442.10690096952	66.4085710886866	871.775769162923	79.9625802319497	484.537198673934	536.429345607758
ALK	240.587413543835	135.50628721714	146.64564980194	899.905265774578	498.482631286606	744.873809395358	444.978227838874	775.040718726814
ALKBH1	227.531667798758	455.765550024807	976.310949306935	272.262365790084	348.688909551129	450.157782062888	327.871146146208	820.960704237223
ALKBH2	887.516489485279	523.835881846026	772.048112470657	844.402983086184	959.589971927926	649.072997272015	440.632773097605	705.240641720593
ALKBH3	823.557724943385	411.007799208164	879.640420898795	919.062052853405	543.305105296895	156.228529522195	450.519944075495	948.147466871887
ALKBH3-AS1	497.296837391332	458.188007120043	591.421200893819	319.674348691478	637.668932089582	791.734072612599	942.958414088935	646.673302398995
ALKBH4	972.750155022368	175.044240895659	41.7011536192149	880.217579891905	109.701953828335	307.634058408439	452.038558432832	6.85873441398144
ALKBH5	644.52472794801	310.206685913727	710.372169967741	270.903489086777	128.183525055647	409.937859512866	479.670690838248	537.650375859812
ALKBH6	542.973452713341	669.758819043636	912.576826754957	396.762477001175	240.451631369069	425.468442030251	156.470014946535	211.28304884769
ALKBH7	388.376859016716	24.4737162720412	756.347969174385	582.399234874174	122.763197403401	958.683479810134	958.058499032632	246.105934027582
ALKBH8	208.20458768867	660.924731753767	153.73066929169	249.737082514912	613.262039376423	678.619611775503	45.5917890649289	275.525501929224
ALLC	276.796226156875	759.339969372377	754.5118231792	706.166046205908	669.963583117351	709.290029713884	135.708606801927	253.807381028309
ALMS1	865.783343324438	281.698360806331	399.52075923793	464.075715048239	331.833415897563	407.273524207994	120.516349561512	627.178120426834
ALMS1-IT1	333.587547531351	420.055869268253	0.393370166420937	491.407866124064	676.511086057872	565.61076734215	559.252250008285	294.906839728355
ALMS1P	349.611267214641	983.641074039042	184.14155789651	191.82580942288	649.747776566073	171.589182689786	1.4216648414731	445.135604590178
ALOX12	904.341378714889	303.305781912059	921.223036013544	367.579836165532	640.239232685417	103.060259018093	874.717716127634	527.323307236657
ALOX12-AS1	405.739789595827	580.751022323966	781.775552546605	202.942270319909	140.708450926468	881.779254646972	949.85129032284	919.60067790933
ALOX12B	416.933024069294	488.785290159285	777.738232165575	18.7751597259194	81.8890619557351	546.24159890227	681.854234077036	335.085244849324
ALOX12P2	268.56694300659	849.621034692973	865.167990094051	576.02673326619	111.001250799745	248.27660061419	215.710835298523	613.804588094354
ALOX15	798.143963329494	880.526471184567	794.978709891438	759.495503036305	959.284993819892	654.007702600211	629.737984389067	647.350411396474
ALOX15B	120.197324780747	604.683898855001	852.999457390979	639.597894158214	524.976641871035	799.897957593203	580.478598596528	903.497858671471
ALOX15P1	250.429359963164	194.340870948508	165.794051019475	846.157572697848	353.101243963465	708.208457799628	927.735107252374	888.924934668466
ALOX5	368.820554343984	689.651692053303	444.558282149956	355.195755371824	676.042240345851	459.523637546226	916.603883262724	32.943959813565
ALOX5AP	393.398331245407	299.648615065962	561.733890092	423.897846601903	399.120876798406	145.486852619797	421.229490311816	751.958084059879
ALOXE3	600.625725463033	17.606666078791	66.9772082474083	708.275270648301	98.2023673132062	545.154874678701	531.480056699365	784.209335921332
ALPI	683.269276982173	463.070411235094	874.781481223181	989.982246421278	228.518297197297	543.28891611658	117.514583049342	816.031713737175
ALPK1	815.942158456892	200.751942116767	207.516602473333	803.689801134169	762.409069575369	261.417029425502	767.451098188758	270.637344336137
ALPK2	607.949315337464	769.376478623599	465.758032631129	84.4562714919448	946.943964809179	6.52409624308348	319.274218054488	269.91901290603
ALPK3	7.24070984870195	129.278411623091	257.299644174054	189.869647147134	287.13679080829	2.66335741616786	793.542798608541	621.194002218544
ALPL	148.27082073316	74.9062413815409	468.496829504147	935.602138750255	366.442767903209	827.634571585804	405.894097639248	722.490892512724
ALPP	77.7805831748992	767.180210212246	742.743843002245	713.593357708305	841.57158061862	531.401986954734	756.321598542854	86.9561578147113
ALPPL2	546.423837076873	379.229614511132	264.095198828727	936.954319244251	799.038080032915	303.940910380334	626.111207064241	533.688612049446
ALS2	99.1665304172784	184.977469034493	441.033120965585	243.477547541261	586.728126509115	337.62078313157	535.623428178951	697.792246704921
ALS2CL	656.481970567256	466.713175410405	755.035960813984	714.666814543307	559.979773126543	584.580281283706	200.343942036852	398.21802941151
ALS2CR11	721.418243832886	643.277340102941	626.874222420156	295.794716803357	596.81853139773	216.326920548454	891.673873644322	696.225995197892
ALS2CR12	231.333861825988	87.5452228356153	825.015442213044	234.611859545112	345.55210149847	982.441508444026	341.286266222596	968.295293627307
ALX1	339.025556575507	849.841549992561	804.184409091249	631.209532730281	282.147070625797	233.980689197779	544.407213805243	804.400963708758
ALX3	888.936232542619	830.060649197549	67.5843213684857	989.312337711453	128.501218743622	67.7094985730946	505.282462341711	529.893440660089
ALX4	112.798469373956	868.637060746551	682.723334059119	205.041684675962	794.177531497553	195.275354199111	913.108385633677	817.180834012106
ALYREF	584.070838754997	118.209957610816	916.578179690987	594.879485201091	364.651069510728	284.289542352781	694.292261032388	657.657261705026
AMACR	424.688324565068	972.45548851788	975.401324452832	531.978021143004	794.906575698406	571.151023032144	273.826126009226	891.165034845471
AMBN	996.873591095209	304.877384100109	807.55723384209	577.866843435913	991.430229507387	92.829056084156	910.286595346406	354.357103817165
AMBP	938.845793483779	711.261286167428	276.88100328669	735.72867596522	447.705763857812	350.165212992579	669.9874678161	231.428357074037
AMBRA1	363.47391968593	34.8281380720437	35.2792576886714	680.751352803782	410.48742341809	693.484877469018	104.034025920555	519.42586991936
AMD1	890.761131886393	515.922174556181	589.187728008255	590.418805368245	65.0133683811873	785.607654368505	972.043710527942	118.991350522265
AMDHD1	334.826122736558	734.876420116052	667.753170477226	906.571740284562	806.655919644982	901.913053588942	838.885491481051	469.673204002902
AMDHD2	484.440895263106	713.750610826537	833.91231787391	353.095169644803	145.953708561137	127.195686101913	895.634703570977	87.9624169319868
AMELX	987.915741745383	635.430601192638	377.961857710034	637.4668024946	975.760089233518	44.5865804795176	738.863699138165	819.320124574006
AMELY	945.800855290145	222.888898104429	170.472156722099	163.540616398677	689.131940482184	144.871161086485	657.738380599767	505.066388985142
AMER1	264.894955093041	795.392072526738	44.3659676238894	269.664462888613	477.742729708552	581.526703434065	606.945105595514	513.157101348042
AMER2	773.433481343091	360.599856358021	613.300198921934	757.568693952635	453.506706049666	407.143242424354	199.83119610697	206.923010526225
AMER3	379.895530408248	202.388401608914	103.711076779291	256.271726451814	798.264509765431	605.748599162325	949.378405697644	922.397988848388
AMFR	205.309083219618	669.019398745149	344.089220976457	185.885890619829	51.3680207077414	834.493221947923	666.523657506332	907.519754953682
AMH	149.717023130506	627.525642747059	126.642492366955	195.20022533834	159.50673003681	275.105467997491	248.676044866443	510.772173525766
AMHR2	256.761185126379	69.1218776628375	461.87773370184	891.698003048077	144.255308201537	488.901130389422	776.782545726746	166.66288790293
AMICA1	843.490076484159	566.338309785351	168.883160222322	276.470571756363	362.968165194616	773.781587835401	408.427700633183	882.496448466554
AMIGO1	410.48540873453	613.008522894233	549.612592440099	956.294091418386	601.895381230861	802.501406287774	818.3989378158	165.922089014202
AMIGO2	760.998625075445	917.46571357362	379.901524400339	112.79792455025	141.743937972933	953.071998665109	590.400282759219	285.035486100242
AMIGO3	46.3162157684565	409.096787218004	578.786365687847	168.566601118073	417.168608633801	358.665659325197	915.822533192113	594.688858604059
AMMECR1	959.399546962231	562.596197472885	121.864150976762	852.523006731644	976.170771056786	748.82839131169	151.444413233548	515.792665537447
AMMECR1L	937.388438731432	746.102826669812	228.866793448105	622.987734386697	200.137140695006	546.814077300951	603.703264612705	959.829190280288
AMN	455.623359419405	809.040452819318	114.077886333689	981.727382401004	445.896746823564	436.306273564696	210.770537145436	230.192694347352
AMN1	81.7572590894997	116.069978335872	410.250921035185	458.383757388219	21.104475017637	923.775206552818	667.428044369444	929.732170887291
AMOT	801.19243520312	433.812714414671	907.617300981656	249.774652300403	794.374931138009	927.449235226959	927.645638585091	747.674400452524
AMOTL1	541.947449557483	670.959922252223	858.287501847371	526.282819919288	53.0711316969246	943.262521643192	230.105062015355	661.569364368916
AMOTL2	20.3815852291882	833.414897322655	230.36653897725	959.948563249782	223.313782829791	872.482598759234	36.07237059623	642.805286217481
AMPD1	227.297231787816	655.161960748956	952.28606229648	411.441109143198	136.708686128259	488.204059191048	851.382843218744	251.707026269287
AMPD2	914.803743595257	359.34949410148	700.529024004936	314.093024469912	865.495634265244	583.587783621624	340.114547172561	560.958895366639
AMPD3	876.386458752677	848.707260098308	520.883064949885	57.4771084357053	801.205007592216	848.57142297551	304.888494545594	787.056950386614
AMPH	422.500496497378	632.257175864652	439.54543909058	80.0014005508274	4.4625187292695	379.64694481343	209.810921456665	781.741280807182
AMT	492.768214084208	972.767930710688	28.9854181464761	536.49461758323	161.149131366983	103.149387519807	621.66819605045	650.53298859857
AMTN	778.306958265603	374.414450256154	558.445018716156	418.213298311457	571.864382131025	886.836817720905	564.019418554381	977.737581823021
AMY1A	356.04371340014	111.605193000287	920.685579301789	767.909159883857	999.902079813182	234.070444246754	257.037681061774	112.841270165518
AMY1B	918.063182616606	693.307463312522	560.9556438867	135.190746746957	653.499630047008	817.692693788558	752.837233012542	952.411815291271
AMY1C	341.920997714624	46.0279304534197	915.416757576168	540.763907134533	278.626167913899	184.377421624959	746.18157860823	475.077464012429
AMY2A	618.423242587596	11.9755384512246	406.842402881011	499.939298722893	595.500235445797	722.690746188164	872.607890283689	74.1771238390356
AMY2B	195.438165217638	82.5114781036973	401.572786504403	785.303365439177	98.279841709882	337.288222974166	410.94778245315	659.179530106485
AMZ1	981.833982747048	979.412002023309	609.938520006835	889.170127222314	715.010150102898	785.916069988161	849.97462388128	348.275755066425
AMZ2	961.471116403118	934.474606998265	954.641557997093	501.928862417117	189.931824803352	969.460046617314	210.887945257127	49.5072714984417
AMZ2P1	246.631689369678	503.743128152564	5.49692660570145	483.876812271774	590.924782445654	326.892396667972	790.334526682273	65.8950177021325
ANAPC1	849.603057373315	354.701553704217	703.049196396023	471.211581490934	612.926123430952	552.253547823057	382.019296754152	947.700229939073
ANAPC10	315.231387037784	589.430124731734	927.581019233912	305.817832937464	603.877989342436	699.347686488181	685.259992489591	153.956855647266
ANAPC11	451.023695524782	871.909026289359	946.323233423755	706.572362454608	923.277761554345	808.273888425902	586.005994351581	351.957896724343
ANAPC13	853.29832485877	69.8802843689919	373.992785578594	555.178831331432	163.379831472412	795.902391662821	619.700117735192	696.64675113745
ANAPC15	341.268935939297	187.501724576578	192.434670869261	274.406185839325	145.298357121646	274.297296535224	939.99484507367	890.772699378431
ANAPC16	903.29984202981	892.774232197553	465.976365143433	477.744218194857	53.2897973898798	310.541961807758	41.0600602626801	644.181650597602
ANAPC1P1	161.581899272278	393.756372388452	421.043509850278	955.898539861664	153.529107570648	266.369344200939	29.1713073384017	404.21942807734
ANAPC2	579.671257408336	448.995899409056	581.018578959629	656.167335109785	838.234996888787	79.8142140265554	542.90317883715	848.422205541283
ANAPC4	984.740425134078	439.934845780954	947.954963427037	213.996178237721	883.991758339107	839.93532997556	776.684150565416	864.975651260465
ANAPC5	794.222014490515	785.223397891968	586.278624366969	582.166787236929	28.4578760620207	793.388631427661	165.307148592547	202.022488228977
ANAPC7	137.762346537784	31.7283414769918	512.739735189825	190.124397864565	472.047296585515	860.962200444192	107.978770975024	218.025338370353
ANG	426.229659235105	927.260571392253	949.456449132413	273.638867307454	31.002341536805	269.588795257732	465.546198189259	398.40112766251
ANGEL1	162.507244385779	346.593293594196	584.872215054929	431.314922170714	657.465116120875	155.875728465617	879.849367542192	212.467372184619
ANGEL2	604.689473751932	728.293317137286	267.270143376663	336.19325212203	9.86835244111717	453.005720628425	95.5350357107818	118.173161754385
ANGPT1	160.449370043352	587.517888052389	123.707675142214	166.77352017723	512.525477679446	476.386234164238	798.946642084047	353.846408193931
ANGPT2	431.353189051151	364.768821047619	11.4164729602635	976.289491867647	522.367083700374	254.405934363604	99.0101038478315	902.986214496195
ANGPT4	858.713628258556	758.765649516135	329.848606139421	817.33916583471	370.200389996171	27.1622072905302	772.167772520334	692.900508875027
ANGPTL1	498.655057279393	131.698933662847	658.948088996112	349.15031446144	11.3816272933036	274.155798368156	58.872138382867	428.034560522065
ANGPTL2	824.901770800352	806.216047611088	249.684033449739	178.073399001732	542.755397502333	2.84212850965559	487.213934073225	667.387169087306
ANGPTL3	469.221520237625	67.4786360468715	371.247485047206	170.885863481089	237.870437093079	860.049578594044	306.642441079021	609.660838264972
ANGPTL4	719.527506735176	417.806088458747	313.317038817331	859.032707987353	314.396854490042	866.075288504362	136.116119101644	98.4512120485306
ANGPTL5	525.454468559474	184.100707992911	581.603196216747	627.932309638709	353.558694943786	443.700711010024	36.7175063584	659.372807247564
ANGPTL6	577.089025638998	416.501984931529	262.958473991603	199.108593631536	780.361953889951	463.443027576432	798.039889661595	656.851172214374
ANGPTL7	555.037786485627	547.232307726517	633.414930664003	528.641133569181	689.433383056894	921.991169685498	9.59335220977664	742.862404091284
ANHX	656.517589930445	333.647012710571	777.439522091299	473.859978374094	438.690898008645	403.163331793621	207.152338465676	424.788720207289
ANK1	338.12483609654	359.645678428933	827.818943886086	541.106951422989	287.824547151104	394.803301431239	902.780110016465	714.994181878865
ANK2	826.320462627336	342.973385006189	460.394330322742	924.923174083233	788.990153931081	19.9188515543938	8.69734981097281	997.494886396453
ANK3	202.340899268165	643.666699761525	721.650414634496	83.1669801846147	27.0175978075713	897.693839157	303.549030795693	979.523767950013
ANKAR	30.5394222959876	233.224517898634	2.26343353278935	928.653021808714	971.659270348027	10.0191892124712	911.003676010296	746.256013866514
ANKDD1A	788.183836266398	219.669134356081	779.819909483194	257.259947014973	70.1675519812852	108.415640192106	963.240582728758	572.851560777053
ANKDD1B	132.434624480084	902.60548167862	662.409457378089	923.368762247264	55.0509169697762	834.82936094515	872.042074799538	900.044098030776
ANKEF1	457.163942279294	565.512513974681	420.819635968655	742.787884082645	805.956449126825	927.428656257689	564.113650703803	678.285737056285
ANKFN1	327.08677649498	29.8564173281193	312.164942035452	978.368203621358	279.140251688659	373.804364586249	328.018678817898	400.687093380839
ANKFY1	465.365012409166	568.958074087277	578.739687800407	497.965425485745	653.791489545256	348.343240329996	582.475678063929	461.451463168487
ANKH	450.013864552602	433.144985465333	293.207527603954	59.3917968217283	184.380908031017	15.3221620712429	477.709334576502	507.423633243889
ANKHD1	75.7027531508356	216.896966099739	181.450561387464	365.223076893017	101.310577942058	648.792462423444	53.3775298390538	502.047487767413
ANKHD1-EIF4EBP3	263.292419491336	163.709485903382	742.482248926535	984.419232001528	298.036152264103	471.229420974851	546.669550705701	266.168166184798
ANKIB1	290.241368114948	386.269850889221	588.348111137748	714.15744186379	202.952241292223	299.50507520698	39.1463260166347	720.66122177057
ANKK1	391.412199474871	173.763735918328	604.289331939071	732.774793868884	456.410801038146	175.319318892434	902.068811235949	360.017009079456
ANKLE1	551.266339141876	399.57550377585	203.229097882286	337.304362794384	571.26826280728	701.605668058619	824.294997379184	569.863891229033
ANKLE2	113.78498794511	1.12566445022821	917.051001917571	261.163177667186	384.60726197809	709.283991251141	554.517078213394	122.408909490332
ANKMY1	633.634253637865	128.70327825658	941.567348781973	132.957082940266	99.3751420173794	124.642081791535	404.088129289448	652.672863565385
ANKMY2	964.7202109918	775.800598086789	76.7325423657894	911.138923373073	649.746981915087	898.253472754732	873.912605457008	346.313570858911
ANKRA2	110.303765395656	739.743354031816	200.555869843811	740.046441787854	584.893511142582	858.055031625554	936.519372044131	15.4658718965948
ANKRD1	811.841851798818	937.694780062884	302.345721516758	185.975032858551	941.026817075908	811.357534024864	940.742760896683	532.445660792291
ANKRD10	345.190399326384	945.833295816556	351.360543863848	206.941676558927	800.467283232138	158.501845784485	781.239641597494	715.524429222569
ANKRD11	161.487356061116	349.106079433113	825.9001232218	81.2991531565785	984.924134099856	539.409700548276	150.551229249686	331.643711775541
ANKRD12	449.015927268192	623.522682813928	420.778527855873	325.110851321369	444.645341718569	700.118500972167	688.670597504824	455.518706236035
ANKRD13A	465.931232785806	536.844978807494	158.892573555931	766.40471117571	542.619144776836	129.960173740983	482.914898078889	834.308153716847
ANKRD13B	562.338115880266	344.42516323179	253.201029729098	916.578278178349	198.681514011696	60.7351211365312	96.4388300199062	401.145754149184
ANKRD13C	869.914890732616	888.125471537933	305.736333597451	460.740046342835	140.308285364881	290.896378224716	287.323708413169	141.52044034563
ANKRD13D	397.13944750838	902.505266712978	288.534698775038	998.804360628128	224.383732536808	796.941657084972	945.509487530217	490.161711815745
ANKRD16	49.5823179371655	283.549533691257	319.244761718437	155.698820250109	470.724456012249	424.852575873956	861.298534553498	817.699610954151
ANKRD17	782.333708833903	954.430268611759	580.678543774411	795.771616976708	552.240160759538	467.067825375125	539.534423965961	986.421346897259
ANKRD18A	313.242925098166	628.645300166681	179.528641747311	308.672852348536	556.862736353651	241.435411386192	550.684065558016	663.451057160273
ANKRD18B	12.8618495073169	480.457687051967	739.071741467342	842.597025446594	694.385060574859	721.864873776212	790.05615063943	449.918504338712
ANKRD18DP	614.210445666686	846.05933749117	150.790966581553	302.165500819683	262.29707361199	534.272187389433	361.150975106284	919.485345249996
ANKRD19P	506.236836314201	82.4554285500199	399.408817756921	773.602334549651	583.243346074596	0.517389038577676	366.975279292092	997.149388073012
ANKRD2	212.24880637601	852.570025250316	698.731549782678	808.189080096781	535.874750232324	613.90250059776	564.30507497862	723.180519416928
ANKRD20A1	753.003913909197	270.604983903468	315.250793937594	883.510516257957	664.491212461144	874.198727309704	271.833054022864	430.045217741281
ANKRD20A11P	771.770975552499	264.012765139341	644.850305980071	607.200091239065	249.28472423926	177.43305535987	111.990489531308	277.524607721716
ANKRD20A12P	263.738308334723	569.980106782168	36.4551967941225	861.747346818447	150.269671343267	247.589716920629	940.068257274106	802.889885380864
ANKRD20A19P	428.501170361415	886.47442497313	244.147399673238	596.288665896282	821.863628923893	401.371088810265	415.040507446975	485.343911219388
ANKRD20A2	944.449416128919	752.82988557592	301.069484092295	141.941061709076	580.710956826806	725.200357846916	728.942131623626	759.976496454328
ANKRD20A3	177.308039739728	736.302567180246	631.161182187498	196.852992055938	348.439876455814	273.265775293112	106.834993697703	593.881147447973
ANKRD20A4	890.78970067203	73.7996136303991	526.193022495136	60.3001727722585	27.4044442921877	902.428261237219	490.422939881682	256.099011283368
ANKRD20A5P	889.190590009093	310.15146127902	71.3802368845791	750.177327543497	172.547453548759	452.340778894722	924.156084191054	509.136708918959
ANKRD20A8P	545.084291370586	372.661700239405	716.77547506988	635.33567590639	70.4681405331939	287.191782379523	467.745660338551	475.621249061078
ANKRD20A9P	465.160683728755	618.641545064747	176.124168327078	887.478569289669	642.67362956889	750.928092515096	213.16083217971	42.971248505637
ANKRD22	805.794987361878	781.984828179702	730.884755263105	394.973388174549	50.0245287548751	944.294005632401	754.000463522971	318.546063266695
ANKRD23	110.025217523798	193.65516374819	740.586233092472	362.476518610492	380.437050247565	588.67199998349	81.3759765587747	51.8624316900969
ANKRD24	78.9438339415938	806.001511868089	970.163996331394	443.489157129079	328.552862629294	39.2232711892575	734.580961288884	232.870533363894
ANKRD26	574.929795460775	795.555334305391	664.67546671629	890.62484074384	461.055067135021	725.071073044091	152.052543126047	459.756823955104
ANKRD26P1	149.542733794078	593.21061312221	282.40727330558	823.942455695942	694.555725902319	890.044783009216	451.677820645273	320.415309164673
ANKRD26P3	865.419294685125	824.180101044476	357.250782428309	172.036100178957	171.743944520131	630.137124331668	114.324752474204	599.534166278318
ANKRD27	41.5628596674651	55.5367229972035	836.086301365867	791.757998755202	549.234688980505	863.196413731202	673.732818337157	835.559846367687
ANKRD28	333.659362047911	528.090886538848	863.665660610422	388.492566533387	447.940704645589	137.280412716791	606.617890764028	41.498824255541
ANKRD29	619.877543998882	764.992692042142	506.395017262548	72.3629540298134	892.629217589274	398.226095829159	184.38459187746	43.1102546863258
ANKRD30A	243.932076264173	507.326330058277	640.815945807844	640.637424308807	388.713361695409	136.11980387941	201.469511957839	35.148304887116
ANKRD30B	322.08533026278	301.212265156209	457.911812467501	762.284465599805	624.438947765157	132.574903545901	412.978186272085	947.895979275927
ANKRD30BL	170.126583427191	667.210088809952	568.010585382581	181.809203466401	156.038403278217	366.663801716641	613.217366393656	293.175393017009
ANKRD30BP2	66.0515376366675	936.356775229797	760.074402205646	897.388368379325	735.779736191034	962.07713871263	901.241683866829	521.889194147661
ANKRD30BP3	587.419151328504	311.485216021538	190.276208566502	990.563940489665	778.177630156279	913.928308291361	514.991117408499	365.278596291319
ANKRD31	34.5694865100086	222.621207823977	438.637860585004	656.681950902566	40.3246907517314	811.067725298926	887.039332184941	849.383817752823
ANKRD32	52.6800046209246	893.75852746889	650.025546550751	761.936340946704	263.627413660288	433.423012495041	156.241110526025	404.732807306573
ANKRD33	929.723338689655	542.672690935433	687.863316852599	633.736010175198	185.37802901119	916.375268949196	798.604008043185	417.434720788151
ANKRD33B	939.818233484402	549.496184568852	446.392988087609	936.03008845821	713.240647455677	185.081525705755	657.383686630055	660.459507489577
ANKRD34A	861.794451018795	587.86158147268	246.885954635218	150.768063729629	863.579548662528	274.502506712452	464.036191813648	919.468712527305
ANKRD34B	394.917246187106	721.944161690772	491.762181045488	171.003532130271	72.8773998562247	957.611312158406	390.83464932628	554.295396897942
ANKRD34C	74.7584868222475	217.598905321211	708.103998331353	993.961902800947	476.976583246142	157.272199168801	120.746274478734	954.74606147036
ANKRD34C-AS1	377.719312207773	492.845737375319	443.68286547251	891.684214118868	187.730436446145	208.057297160849	521.165794227272	924.324390478432
ANKRD35	14.3284054938704	974.964829627424	628.567528212443	6.48750620894134	421.493365196511	550.225300481543	405.055412324145	133.795202244073
ANKRD36	274.495962774381	241.070848656818	624.809564789757	123.172027990222	624.503565952182	902.08469145	591.512172715738	192.681245971471
ANKRD36B	507.42160808295	323.194495169446	202.699627960101	693.829330615699	676.787370350212	835.910274647176	384.227771311998	643.725202186033
ANKRD36BP1	492.017445620149	691.050729248673	913.283251458779	229.272575583309	861.282292287797	61.5075540263206	675.148355774581	376.427744748071
ANKRD36BP2	761.768264928833	421.301831724122	886.557337129489	1.92335434257984	575.64073218964	761.992072686553	233.230379642919	571.545172249898
ANKRD36C	687.03868216835	40.22355703637	353.60811278224	495.139193721116	633.021939313039	823.711716802791	421.344394795597	245.848410297185
ANKRD37	521.455537294969	95.8000239916146	101.826428901404	518.913977546617	917.035890975967	715.379440225661	709.097657585517	618.712986120954
ANKRD39	388.593479292467	93.6150813940912	442.627656739205	13.043177081272	602.00458788313	446.732965065166	333.119116956368	265.342597151175
ANKRD40	606.331213144585	48.5581674147397	630.101514747366	49.4978954084218	114.112669136375	886.605335632339	804.473702097312	524.032847722992
ANKRD42	94.4847259670496	463.724406901747	177.18708072789	997.450480470434	579.110397957265	745.340251596645	319.135413272306	680.948738707229
ANKRD44	166.818946134299	232.753026299179	789.808870991692	674.624516861513	642.722585937008	550.328318960965	857.527367537841	752.437104936689
ANKRD44-IT1	665.942505467683	30.4374678526074	283.987291390076	779.944827314466	844.963843934238	661.363506456837	353.210011962801	703.896059188992
ANKRD45	190.276243491098	487.126279855147	740.641144337133	721.993208862841	530.817256309092	95.8656221628189	162.224640371278	302.224862622097
ANKRD46	183.011587476358	440.714668249711	869.025010382757	966.937134275213	480.03642167896	209.976602345705	267.282295506448	563.50524071604
ANKRD49	978.867210680619	372.968448093161	477.88777644746	281.026251148432	817.426495952532	214.780514361337	454.205997986719	102.325854822993
ANKRD50	201.205218909308	855.166699038818	982.670566532761	302.489025518298	574.38049162738	795.974534237757	315.358042949811	458.95919483155
ANKRD52	664.505023509264	470.346269197762	213.979972759262	411.798309767619	113.325509242713	676.465253112838	117.670465959236	687.179825967178
ANKRD53	487.362402491271	584.323999937624	505.933748558164	270.091293612495	614.81800605543	178.149793762714	745.68499205634	855.736578814685
ANKRD54	96.8403767328709	239.011467434466	408.923418261111	609.419924905524	383.958229795098	229.022165294737	312.27301992476	543.734149308875
ANKRD55	467.89524727501	808.632680447772	569.505921797827	326.9916663412	919.54565490596	630.419567227364	431.10408145003	215.748247224838
ANKRD6	628.0519857537	427.968063158914	942.946104099974	422.181256813928	333.802883280441	245.039965258911	901.205657282844	207.742315949872
ANKRD60	617.466144263744	824.395660543814	484.496066346765	564.561709063128	806.492100935429	670.621057506651	823.250247398391	582.577010383829
ANKRD61	987.135858274996	854.241079650819	261.410509468988	848.645492456853	988.657132023945	715.406628791243	742.108600679785	940.918571548536
ANKRD62	610.422856872901	80.097190104425	86.6162306629121	178.252291632816	795.76512100175	517.070073867217	373.675681417808	345.168741187081
ANKRD62P1-PARP4P3	303.865083260462	339.597110636532	83.5723080672324	964.613699819893	579.567692708224	9.53485397621989	701.450516236946	530.829318333417
ANKRD63	248.090448789299	997.184675419703	238.454758189619	2.38648732192814	225.852249888703	716.470972634852	1.51804485358298	726.359721971676
ANKRD65	599.501994438469	108.566836221144	282.114458503202	267.568177776411	34.9470786750317	372.319766785949	755.644450429827	847.850775811821
ANKRD66	331.244708271697	797.323788283393	204.335423419252	187.935590976849	987.162022618577	397.209139773622	399.246074492112	701.887359144166
ANKRD7	219.422309426591	21.396212046966	95.1546835713089	317.648634314537	317.306805634871	296.571096405387	885.690271388739	156.139952130616
ANKRD9	365.772921824828	935.699902940542	460.273576434702	432.24939214997	130.202916683629	748.318829806522	594.359098933637	622.167408932
ANKS1A	582.209738669917	429.741596803069	132.176001556218	832.470010733232	859.553140820935	497.625031741336	174.277234589681	722.544013056904
ANKS1B	772.251202259213	550.762950675562	969.685281161219	170.71368242614	545.157153392211	462.278326740488	308.038591872901	258.041115477681
ANKS3	852.139140013605	887.584757758304	725.279897451401	396.091722883284	462.474077474326	972.981480881572	503.262476762757	311.532119289041
ANKS4B	151.29906963557	757.407186087221	585.895322263241	824.84518783167	703.499350231141	248.814685503021	904.160810168833	954.64983698912
ANKS6	324.517583241686	542.087636655197	69.6868707891554	515.47589735128	838.716499507427	754.382903454825	567.096114857122	890.439230017364
ANKUB1	565.840318100527	560.369134647772	934.169086394832	337.215948384255	537.981391418725	494.486570358276	966.751107946038	398.268467048183
ANKZF1	589.312298921868	213.52241630666	789.548313710839	466.079114703462	739.600356668234	873.818366788328	443.29058425501	640.813369303942
ANLN	836.053367471322	529.122104868293	534.766589757055	116.69730162248	499.874813482165	826.125123538077	601.295755477622	8.79478105343878
ANO1	813.945974688977	970.917804865167	661.139348288998	94.7430836968124	303.539939690381	424.168309662491	946.338030043989	956.523983739316
ANO1-AS2	403.124012751505	386.592980008572	6.07577571645379	387.702547479421	815.160083817318	714.020280400291	323.057216824964	551.991042913869
ANO10	260.664626955986	769.036972662434	508.053314639255	940.674303099513	403.834922937676	57.6369205955416	126.996580511332	554.845415521413
ANO2	925.190614769235	273.362293606624	212.078599724919	657.779176020995	5.81260351464152	800.507651874796	480.247285915539	241.436328040436
ANO3	225.529290502891	328.632653225213	997.585852630436	122.969395946711	120.501619763672	451.042934320867	415.916864527389	7.83682754263282
ANO4	515.421253629029	615.540547296405	506.62493170239	266.033248277381	433.65188757889	528.532114578411	194.389258744195	905.195584753528
ANO5	882.669053506106	508.876491570845	85.3769590612501	920.614480040967	284.492983715609	23.5397964715958	719.908050028607	221.159880282357
ANO6	241.834621876478	630.571584450081	318.573435069993	430.815677857026	651.191323529929	135.633486090228	357.742762658745	366.178996860981
ANO7	966.31633490324	863.866595551372	216.998505406082	719.029715051875	831.914221169427	460.938661824912	585.543677443638	611.883157398552
ANO8	191.583826439455	398.453953675926	259.802340297028	479.748422745615	258.310687495396	506.614628713578	276.956112589687	70.0891744345427
ANO9	224.797998322174	713.227591011673	308.932811254635	901.481525273994	619.551171781495	153.280085651204	683.752606390044	94.1819651052356
ANOS1	21.8821268063039	145.564086968079	104.742397787049	22.211785428226	673.837039852515	106.058700475842	589.068787870929	481.254283571616
ANP32A	542.421830119565	473.009240347892	900.731042725965	491.833202308044	981.919454643503	819.023165851831	727.207931457087	464.956272859126
ANP32A-IT1	46.3105803355575	721.803520107642	632.604361511767	474.364838330075	657.888813409954	394.157000118867	671.026713680476	322.413933463395
ANP32AP1	218.229538295418	702.592700719833	914.179815212265	368.196606170386	603.199248667806	477.732577826828	654.183648526669	739.57584425807
ANP32B	984.629527665675	326.298046391457	739.939734805375	660.671342397109	74.3084526620805	397.630644962192	5.68681326694787	931.051538093016
ANP32C	235.52113538608	210.643672849983	812.617837451398	219.669311773032	816.29672809504	341.069261077791	978.181077400222	265.076214214787
ANP32D	634.792592842132	758.325275965035	76.3979011680931	227.899194927886	837.659400422126	264.449456706643	722.184015670791	101.141385966912
ANP32E	319.889906328171	219.545007683337	696.295139146969	847.491857362911	209.615953499451	28.1756308395416	794.116445584223	406.014283653349
ANPEP	388.291149865836	484.294327907264	579.899895237759	73.4126090537757	153.784425929189	200.968072749674	103.267665021122	489.243076881394
ANTXR1	747.293446911499	546.593917999417	60.2462443057448	752.946064807475	452.960076509044	728.645211784169	723.698826739565	36.9359634350985
ANTXR2	639.100432395935	795.140556292608	313.517606817186	656.556798378006	47.010897193104	721.822963329032	311.080960324034	716.56260965392
ANTXRL	402.486531296745	602.170997066423	726.252818480134	689.055999508128	12.2687283437699	541.7114791926	452.220290666446	7.36374966800213
ANTXRLP1	307.250932557508	943.046205444261	891.233885427937	422.421184601262	817.771556554362	840.736969606951	115.762883098796	560.299832373857
ANXA1	997.346524614841	979.104071855545	580.975725781173	399.732448160648	304.464094340801	3.99511912837625	742.224708432332	727.286982815713
ANXA10	105.392088182271	734.095831634477	779.721178347245	806.661412818357	393.114091362804	864.543849369511	778.671968495473	460.870359092951
ANXA11	1.66812678799033	624.078719876707	180.953677976504	177.580422256142	770.012316526845	173.982030712068	101.666473550722	393.788499757648
ANXA13	19.5249009411782	736.544637940824	403.248148271814	312.987220007926	65.1878570206463	58.7859654333442	401.333262911066	445.781431160867
ANXA2	517.639821628109	353.926878655329	860.664738574997	977.310455404222	775.247324956581	655.931983375922	239.97585172765	814.139417838305
ANXA2P1	845.723847625777	502.637310419232	579.263014253229	852.259085513651	270.797866862267	127.692117588595	320.764086209238	82.3721194174141
ANXA2P2	478.729167720303	39.1419685911387	577.129743993282	306.494132615626	876.750224968418	15.9806217998266	155.195244820789	647.865843260661
ANXA2P3	626.98674458079	132.016376359388	495.772598544136	471.654352266341	189.938183641061	782.726278528571	996.413231361657	313.955726800486
ANXA2R	213.38384388946	543.492808705196	291.262762155384	424.844437744468	47.6858529727906	55.89226516895	709.601236740127	3.58604034408927
ANXA3	948.186547262594	703.258159337565	423.570520477369	967.430042102933	578.910246025771	607.7414767351	393.176115350798	951.889099553227
ANXA4	812.836625147611	262.105283327401	9.93478996679187	85.6494037434459	202.082439558581	3.57521092519164	478.894710773602	291.173906531185
ANXA5	847.408859524876	348.65157189779	710.066861007363	105.862572323531	198.941393056884	988.114665728062	454.058315139264	19.2630300298333
ANXA6	562.788637122139	280.813409015536	439.895573770627	453.485370380804	643.845047568902	810.415818355978	6.34144828654826	195.987411774695
ANXA7	759.746466297656	382.681598421186	398.641298059374	295.891968999058	175.559933064505	63.2024267688394	400.02543758601	937.313025817275
ANXA8	149.60635243915	33.0498539842665	762.745552696288	662.574823480099	472.68103971146	925.839936593547	742.750770878047	161.745182005689
ANXA8L1	792.530891485512	259.767802897841	951.327308779582	110.119744669646	93.5276260133833	543.886875966564	291.627505095676	936.138594988734
ANXA9	478.385151829571	984.964520204812	216.388271423057	938.171959249303	133.924939436838	119.481294881552	980.270465137437	860.684568760917
AOAH	307.552304584533	529.031079495326	458.817320875823	171.765406150371	462.156271794811	332.266404060647	539.047138532624	441.543809371069
AOAH-IT1	711.116259684786	370.045989751816	14.7679559886456	179.781998274848	732.860762858763	941.005851374939	135.577127803117	390.696212882176
AOC1	478.231501067057	713.275275193155	407.092120731249	753.6718219053	727.171559119597	789.85450277105	329.571148846298	832.212291192263
AOC2	667.848347686231	546.60718771629	472.86934684962	367.230897303671	840.938510838896	181.216520024464	726.282446179539	812.572204973549
AOC3	69.5462049916387	479.273580713198	157.209482975304	334.727266803384	854.289036709815	304.230909561738	505.541210528463	797.748127719387
AOC4P	464.048455702141	175.672871991992	744.345211656764	3.24746430851519	17.510496545583	509.650830412284	696.913026971743	64.2769285477698
AOX1	547.991652972996	442.264215322211	851.414642529562	830.509723396972	950.891388580203	374.614915112033	361.060254974291	980.901169590652
AOX2P	897.736014798284	370.999473845586	940.034909173846	778.729215729982	412.410455523059	743.740121368319	858.497610315681	5.8623671066016
AP1AR	408.358818618581	189.367146696895	154.866771772504	451.424463186413	338.396732229739	473.343435674906	366.85601179488	251.055094879121
AP1B1	251.614405075088	554.573742905632	734.551272820681	330.171175999567	500.105137238279	650.574389379472	367.351760389283	115.794921061024
AP1B1P1	514.79218271561	55.6771620176733	738.217495381832	898.275124840438	724.559750407934	596.180428517982	560.754938516766	277.848806465045
AP1G1	931.507929461077	361.617284128442	747.557727620006	862.643779022619	407.941685058177	107.712602941319	547.056471463293	30.2189071662724
AP1G2	3.05589102208614	887.195533374324	945.699464995414	370.252148713917	218.145365826786	936.357300728559	108.197248773649	133.584190858528
AP1M1	378.502416890115	192.494401941076	690.840998664498	787.734421435744	719.51526356861	697.991056600586	308.110069716349	918.516012839973
AP1M2	325.517697026953	932.089288951829	269.673203583807	679.89057325758	966.431504581124	360.106363426894	996.498638996854	88.4229151997715
AP1S1	516.089871292934	454.135397216305	106.097885174677	851.509843021631	187.878763768822	907.681848853827	668.081504525617	125.191924860701
AP1S2	461.670924676582	839.052047114819	445.385906612501	978.923467453569	448.925382690504	333.681390853599	677.630435908213	854.600551538169
AP1S3	95.575843937695	255.962100811303	92.600601259619	347.085548797622	890.913987997919	175.646085524932	683.99466923438	256.421881262213
AP2A1	976.147694513202	108.557189116254	846.028691856191	59.1465081088245	28.5999332554638	113.387742778286	228.019080590457	281.003129901364
AP2A2	36.6840127389878	873.662812402472	25.9551436174661	459.199837874621	342.92649733834	167.204891797155	839.839731808752	931.948414072394
AP2B1	752.928336383775	422.054936410859	8.28253850340843	923.920271918178	992.821177700534	488.479667110369	255.944580072537	168.051035841927
AP2M1	598.359692841768	754.27039549686	556.861684424803	189.027741085738	788.728620857	279.137197183445	988.771193893626	671.280414098874
AP2S1	529.407311463729	347.557386150584	244.4594274275	695.504503091797	292.802649317309	995.587162673473	640.120337018743	547.49094019644
AP3B1	926.048391032964	423.302188981324	699.67699307017	515.887048561126	850.632674526423	906.164497835562	226.727890316397	406.259931158274
AP3B2	769.820264773443	809.379562968388	391.171457478777	833.806755486876	67.1516985166818	168.663724092767	934.184476500377	533.331738784909
AP3D1	727.586431195959	398.918440099806	103.304567281157	890.307570341974	562.081998214126	221.783420071006	118.267119629309	331.409869948402
AP3M1	231.666361913085	594.502819003537	609.048624057323	480.364704504609	574.516171123832	810.867440653965	453.951988136396	447.045795153826
AP3M2	814.547433750704	197.25312339142	985.683030216023	390.937232179567	559.080017264932	821.710958378389	53.2376542687416	169.643736910075
AP3S1	343.302740016952	507.442547939718	359.648117562756	459.047297015786	43.0009197443724	474.296157248318	451.78734161891	502.784861717373
AP3S2	940.986903151497	341.340654529631	47.0935315825045	39.1787190455943	415.499947732314	136.457417625934	42.5928223412484	229.791209101677
AP4B1	384.677309542894	389.017654815689	479.937724070624	965.223748702556	731.280988547951	956.94473804906	308.447848306969	387.632746482268
AP4B1-AS1	957.409982802346	316.842635162175	948.007523315027	652.689900016412	138.543172739446	330.584493232891	442.933532642201	189.604637911543
AP4E1	940.188834676519	342.261588433757	421.81187053211	973.726529395208	834.090098040178	351.82970459573	389.718804508448	743.997130310163
AP4M1	535.293988650665	485.423475271091	423.253880580887	17.0783461071551	586.476515512913	124.282348435372	551.467101089656	598.280707839876
AP4S1	715.916812419891	790.396932279691	720.231931190938	677.919299108908	220.22154321894	45.7703471183777	740.106547251344	864.2548895441
AP5B1	677.633389830589	725.064968457446	158.111448865384	515.945786144584	331.431173020974	502.133434638381	209.090137388557	485.92039453797
AP5M1	135.765876388177	850.819677580148	832.08540501073	911.124537466094	596.09568095766	977.868506219238	919.595019659027	636.323918122798
AP5S1	270.093239145353	726.119978586212	328.943410189822	935.151554876938	341.316577745602	753.739566775039	165.890651289374	745.027011958882
AP5Z1	437.240881845355	329.594346461818	926.929769106209	992.770201526582	657.269919058308	896.6517127119	869.017925811931	255.267926957458
APAF1	762.819686206058	764.740200713277	163.348727859557	438.863831339404	50.574924563989	282.996399793774	16.381248831749	397.294341120869
APBA1	965.959041146562	738.223674241453	688.480144599453	584.619564237073	67.0113686937839	68.5268666129559	859.664198709652	95.6106251105666
APBA2	428.128678584471	13.0438283085823	36.6703781764954	580.483853584155	275.820433860645	214.586868183687	43.4071242343634	470.955101540312
APBA3	593.68184581399	663.600921630859	293.311418034136	72.6980429608375	246.847924077883	944.032156141475	974.094380857423	422.002752544358
APBB1	210.01633326523	25.0121746212244	26.8481110688299	620.431516552344	961.593698710203	487.714760936797	317.469868343323	608.251006342471
APBB1IP	86.753016570583	808.04267572239	552.065519150347	53.2189621590078	881.931348936632	498.813113896176	550.487328786403	311.74143194221
APBB2	143.857906572521	408.950980054215	364.269641926512	51.7685951199383	546.255393186584	658.452258445323	757.501434069127	481.341761769727
APBB3	782.201411435381	670.150293502957	154.776468873024	286.886413348839	451.328305993229	299.807240488008	388.470190111548	147.002137266099
APC	447.37874972634	326.89161435701	457.804908975959	339.04154645279	16.7761009652168	197.81004730612	846.404632786289	86.2842544447631
APC2	167.558725690469	262.039583176374	317.343267379329	694.869073340669	576.121957274154	295.047959778458	320.693608606234	679.893555352464
APCDD1	45.5961732659489	490.782748907804	7.413872750476	844.294662354514	213.079180801287	875.429440056905	114.778376882896	262.588176643476
APCDD1L	926.000934327021	507.193577243015	897.897570161149	34.0682114474475	91.7106647975743	607.41536365822	159.331360366195	179.519324330613
APCDD1L-AS1	275.64506046474	181.042391806841	41.7303750291467	697.523882845417	820.094122784212	705.873683327809	941.870437003672	575.706575065851
APCS	286.778459791094	336.708448361605	772.660505957901	805.248545017093	934.687578584999	661.067383596674	599.417007993907	896.491965511814
APEH	117.923875339329	659.945409977809	633.475640323013	996.653482550755	411.170366918668	749.131279531866	56.7416928242892	270.48535598442
APELA	237.683940446004	131.054829806089	616.089561954141	903.923020465299	754.677043994889	848.625189159065	182.337965350598	97.5752556696534
APEX1	285.506389802322	199.409680673853	200.347058940679	430.792465806007	566.393146524206	625.948382541537	331.008548848331	346.037697279826
APEX2	325.486038345844	652.032729238272	986.580623313785	999.794448493049	542.822199175134	403.949473518878	963.179603451863	100.272120442241
APH1A	626.848293468356	492.167476797476	282.191268866882	637.334470869973	583.624233258888	234.096714993939	975.306299049407	608.685466926545
APH1B	33.0793673638254	567.543701035902	618.196594994515	568.870904622599	194.643307244405	60.7434781268239	489.08854322508	558.280961820856
API5	869.989121798426	139.823065372184	823.546757688746	53.0767187010497	352.190921083093	475.476137595251	788.493640720844	313.204833772033
APIP	808.255419600755	145.79638838768	611.940110102296	620.934083126485	781.149872113019	457.650537369773	402.209198800847	370.588034624234
APITD1	190.725469728932	770.985626382753	268.779346486554	94.1942611243576	35.8087422791868	738.701021531597	749.400601023808	330.125731183216
APITD1-CORT	948.723222361878	624.803247861564	113.253966905177	23.2805367559195	562.685972312465	107.109620468691	869.512943085283	259.225043933839
APLF	909.689986146986	659.350913250819	217.946988763288	128.098645014688	556.806161766872	797.860481310636	78.7178669124842	459.211367182434
APLN	107.882473617792	729.796221479774	113.636420108378	541.455591097474	833.719873102382	195.383522193879	851.254793349653	179.181697312742
APLNR	290.520016802475	609.153748024255	334.502865793183	314.79519396089	709.053013240919	42.7791771944612	416.827344801277	360.608342336491
APLP1	837.771468097344	399.45394732058	629.808792611584	780.500516062602	122.035200940445	451.254345243797	95.1573858037591	799.306614790112
APLP2	351.73140396364	38.1678950507194	48.9012082107365	474.797677714378	496.708924882114	571.970980614424	160.986647941172	932.033444754779
APMAP	312.201626133174	949.15620656684	530.264289816841	989.111503586173	169.137518387288	263.222167501226	78.8743018638343	653.202608693391
APOA1	62.7314553130418	830.204519443214	763.973881257698	725.492513505742	534.520969726145	869.735661661252	823.77985608764	879.414940718561
APOA1-AS	413.203848293051	75.6336946506053	427.547263912857	887.687695445493	398.079056292772	900.731750065461	803.932602750137	230.892354156822
APOA1BP	415.158796589822	338.595691602677	708.90208426863	981.969136046246	292.218456510454	370.210605207831	126.301586860791	294.582875678316
APOA2	914.472356671467	936.042285757139	655.699564609677	285.607488593087	780.176650267094	848.946708720177	935.938046779484	111.985489726067
APOA4	529.767104424536	467.474205652252	680.762680713087	661.202109884471	572.015906684101	170.199013315141	195.407365914434	964.558898704126
APOA5	553.102120291442	274.498131824657	149.465650785714	474.821384763345	82.9034303314984	574.180923169479	131.364075001329	29.4115969445556
APOB	874.975932994857	153.725544689223	535.65780678764	938.322562957183	1.8886907491833	697.428594576195	228.593552252278	725.093461340293
APOBEC1	680.529177421704	470.85343208164	448.552172398195	250.184383243322	622.869698563591	315.11195236817	629.211833234876	907.678160117939
APOBEC2	442.532003624365	597.072340082377	759.354050736874	222.326029092073	961.469068657607	493.643274297938	471.42680361867	104.867618763819
APOBEC3A	726.498638745397	730.332679348066	175.599829992279	244.608293520287	531.689058989286	177.449480863288	119.420329574496	303.03925415501
APOBEC3A_B	398.344828514382	4.71448060125113	949.649727437645	629.954651929438	199.021735694259	255.790035473183	367.306867847219	493.511641630903
APOBEC3B	905.953663401306	972.378474427387	388.84819066152	309.087288798764	376.899454509839	399.820691207424	447.582317981869	164.796659257263
APOBEC3B-AS1	753.659406909719	711.061906768009	123.601570958272	998.416158137843	883.831307524815	92.6210982725024	987.522611161694	358.049502130598
APOBEC3C	391.060479683802	175.925600575283	3.10957664623857	58.5067914798856	383.211272535846	474.904493661597	472.138268407434	512.550323270261
APOBEC3D	478.889204794541	679.888715734705	947.928264271468	676.985446829349	62.9005029331893	237.607241375372	513.066787505522	906.806855695322
APOBEC3F	583.029127446935	383.275442989543	58.4120096173137	240.20461877808	335.072884568945	916.689302539453	420.453129569069	227.374068461359
APOBEC3G	880.405010655522	72.2393288742751	393.388690426946	638.324149418622	542.480082018301	364.759389078245	359.288188861683	792.582745430991
APOBEC3H	190.304729854688	68.6167466919869	66.8967145029455	27.8765640687197	886.037867283449	380.184190347791	436.085855821148	964.971370995045
APOBEC4	950.012200046331	123.358813347295	171.595253283158	90.1308942120522	481.998324859887	788.731559878215	304.215973475948	444.425528403372
APOBR	961.034394567832	385.367632843554	280.786435119808	958.578023826703	182.330894749612	678.603162057698	652.080099331215	492.186153307557
APOC1	341.018834616989	924.696082016453	6.25268602743745	848.204079316929	765.167145058513	753.582354867831	686.196218244731	282.411920372397
APOC1P1	822.299950057641	611.398068023846	246.031725313514	442.511302651837	760.194530477747	644.261236535385	968.299903674051	788.26688718982
APOC2	331.072989851236	481.634562602267	528.560978127643	448.117394698784	782.450581202284	546.98865651153	410.878803348169	442.369072930887
APOC3	82.827738719061	246.829360025004	531.147435773164	677.795608062297	891.968492418528	512.466176413	601.339386077598	465.105450013652
APOC4	108.172448119149	46.8370711896569	505.666081095114	275.527716847137	258.890005527064	836.597883142531	818.292173324153	605.778148397803
APOC4-APOC2	384.593263966963	897.880549076945	942.462561186403	389.2030287534	295.489597599953	178.331651259214	832.991323666647	996.915944851935
APOD	867.221580119804	299.300821498036	214.50261794962	601.933551952243	450.774434488267	922.40031529218	734.258449170738	136.855878401548
APOE	333.31358153373	207.155101699755	294.219523202628	990.376139059663	896.305980859324	982.686472591013	254.843123722821	301.691587315872
APOF	876.705667935312	97.7284719701856	857.422235189006	424.536038655788	626.427145209163	634.808957343921	128.115066094324	261.743054492399
APOH	800.674485974014	77.5121825281531	758.391875308007	65.1792869903147	832.121378509328	450.159673811868	979.646174237132	781.228942098096
APOL1	587.360006757081	659.793234430254	641.562593635172	52.6437012013048	632.12053058669	923.741861479357	121.83232139796	891.532465349883
APOL2	305.305015528575	57.7023616060615	424.306384986266	286.0421333462	494.877450168133	662.691806210205	317.978675244376	487.018188694492
APOL3	33.2707308698446	28.5285769496113	963.559967465699	35.7054122723639	861.741603817791	468.468020437285	396.220537833869	205.499936593696
APOL4	181.857379851863	593.762550735846	854.875431628898	622.494325740263	599.437426542863	633.955291006714	975.002326071262	927.543651079759
APOL5	167.028011288494	46.9203325919807	330.926897004247	857.540439581499	324.866401962936	617.570823524147	348.368158563972	429.485377157107
APOL6	900.254945270717	232.672093436122	258.715327363461	1.38265895657241	739.030094351619	973.507029470056	310.29529706575	634.963871212676
APOLD1	720.054423669353	491.139636142179	92.1916395891458	961.646592710167	668.232851428911	957.91889866814	648.206340381876	80.6687616277486
APOM	121.501430869102	891.123787499964	761.627137893811	859.405900351703	115.936723304912	695.556177990511	325.870909495279	169.114519609138
APOO	864.344834815711	971.46541508846	321.439115796238	181.974723003805	690.801883582026	581.853006500751	250.358646735549	961.172958137468
APOOL	912.130934651941	605.671936413273	450.087069766596	523.757582996041	187.975594773889	575.920374598354	799.507868476212	971.310749650002
APOOP5	657.409669365734	908.934475155547	872.568907914683	535.405333386734	994.134271983057	403.192001394928	24.9748292844743	334.630362223834
APOPT1	883.62323702313	562.541036866605	949.732616310939	493.602688191459	67.0630054082721	307.182436343282	990.201547043398	618.280509952456
APP	382.033650996163	533.010170329362	607.471535680816	41.0262187942863	787.724422523752	873.198780696839	829.297344665974	694.153900258243
APPBP2	511.238985229284	415.761062642559	758.289531106129	68.6222994700074	322.510360041633	933.079029899091	962.749911239371	333.274501608685
APPL1	638.671837979928	0.512864906340837	513.788665644825	439.116954803467	463.872391032055	640.406387858093	945.578052196652	847.739622695372
APPL2	247.366172261536	632.154121762142	639.385344693437	618.92455117777	777.0442427136	525.036152917892	518.768182490021	33.1157047767192
APRT	73.437815066427	321.505661588162	240.99941086024	648.581649409607	831.30159904249	568.907732609659	920.123622752726	837.177693843842
APTR	687.942605465651	463.531105080619	227.207076968625	865.063492674381	613.362568663433	111.786987865344	889.941662782803	731.212686747313
APTX	620.201383018866	123.241014312953	605.634178966284	184.443397913128	312.822798267007	962.069337489083	348.899643169716	500.504318624735
AQP1	732.641023118049	404.349004616961	46.1634402163327	655.029939021915	488.926494959742	691.721830051392	388.918641023338	689.445485826582
AQP10	920.152141014114	690.071183955297	2.51664617098868	92.6745971664786	584.696497535333	671.982748433948	85.3791183326393	190.086407354102
AQP11	151.823651278391	637.492692330852	493.322255788371	293.632730841637	295.991195365787	730.738009093329	897.476898040622	796.484706923366
AQP12A	878.019822295755	929.35039754957	436.332531273365	781.524669378996	477.117576403543	118.697830708697	412.653245730326	200.466274283826
AQP12B	438.089367933571	583.458871114999	821.311123436317	620.025160023943	497.601443435997	363.999371882528	977.449421305209	554.420133819804
AQP2	244.965347927064	176.495707128197	698.847177671269	297.610994195566	989.918942097574	669.118082150817	893.430954543874	469.3897748366
AQP3	575.031990418211	539.303917437792	713.627453194931	118.486327352002	80.2866590674967	458.364226622507	633.54266481474	668.982826871797
AQP4	47.8266531135887	528.885292820632	927.806378109381	142.979551106691	928.933533141389	453.089518938214	892.60692265816	539.541957667097
AQP4-AS1	220.535308821127	293.03431417793	884.210377465934	102.225741371512	710.656334413216	672.195131191984	586.449353024364	869.505332550034
AQP5	765.243781032041	6.27158931456506	256.049316376448	771.306121023372	943.829271476716	592.709599295631	952.398747205734	816.303090425208
AQP6	67.487136926502	495.880398433656	919.923544861376	818.65586573258	903.930437751114	901.731917867437	404.873798135668	764.555347384885
AQP7	353.917134227231	492.011785274372	109.814480878413	394.377659074962	431.848589563742	309.840752743185	328.94043601118	253.907930338755
AQP7P1	44.5376902353019	838.644662639126	24.2029670625925	241.272365907207	149.443155620247	635.761809069663	680.596891324967	289.693156024441
AQP7P3	151.277797995135	485.999367432669	381.36330107227	825.289495754987	0.409117201343179	766.344437841326	642.584720160812	304.94119762443
AQP8	714.428785257041	797.647156985477	508.041316876188	726.270262617618	626.514817588031	880.925112403929	242.427886929363	40.5636564828455
AQP9	934.967228211462	798.264160985127	316.866248613223	266.825765371323	950.858489144593	878.877772949636	646.792320068926	289.882146287709
AQR	327.668664045632	213.419080013409	580.116588622332	219.528254121542	519.211260834709	84.67120770365	680.59907364659	326.588767347857
AR	85.1255147717893	66.8788009788841	130.169924581423	948.171769268811	582.014755811542	434.502861695364	939.59412840195	820.543986745179
ARAF	112.53289389424	407.529511954635	641.946938121691	401.123149320483	327.901346841827	506.634796503931	72.2176334820688	601.968207396567
ARAP1	845.434664515778	48.2980238739401	36.7553071118891	815.695150056854	936.920809326693	973.210050491616	80.7876866310835	289.531899383292
ARAP2	168.555468320847	35.7530710753053	414.918732363731	899.798503378406	346.929532010108	937.682753661647	463.640326634049	206.373000517488
ARAP3	55.9872661251575	790.674480609596	513.84581043385	385.227448074147	745.629159966484	289.740917738527	589.278734056279	79.6659223269671
ARC	347.004170995206	306.862054392695	136.274648597464	47.191864810884	402.181890094653	780.705772107467	745.850441977382	156.25061863102
ARCN1	368.916260777041	955.160673242062	543.462239438668	581.641036551446	429.45055407472	158.999051665887	660.835182992741	903.994561638683
AREG	616.611434379593	96.8069056980312	799.466593191028	618.600649526343	198.829038767144	382.665473967791	685.301162768155	289.679206907749
AREL1	627.820725785568	114.154895069078	305.000617867336	414.489723043516	343.395597534254	503.009169362485	575.550569919869	858.465911122039
ARF1	215.716897509992	854.191365651786	102.345173479989	541.741815395653	554.89805736579	860.528272809461	616.705868858844	526.418652152643
ARF3	680.803840514272	429.500423138961	92.5925758201629	32.5471367686987	552.528216503561	157.899188110605	410.290916915983	855.014682281762
ARF4	909.129009582102	890.941897872835	28.0273298267275	640.843305271119	326.471396256238	521.239915629849	803.816760657355	2.70322128199041
ARF5	445.280550746247	91.6213358286768	912.728960392997	555.673132184893	925.073686055839	446.21906708926	335.880061378703	441.391268977895
ARF6	525.429607601836	690.890905912966	142.838185187429	341.650026384741	293.095405446365	787.997120292857	185.176010709256	284.449466969818
ARFGAP1	736.64270224981	706.391566898674	70.3060682862997	897.245629923418	456.758130574599	204.870632849634	433.481859276071	690.563526004553
ARFGAP2	70.9725907072425	841.433540219441	153.871776303276	736.349761253223	91.2496445234865	114.373665768653	167.522502364591	815.605562413111
ARFGAP3	366.395667428151	456.026415340602	357.097609899938	161.597461206838	741.032559657469	631.993451155722	720.951968338341	898.733486188576
ARFGEF1	757.166994735599	903.466761577874	421.087827067822	927.555591799319	102.85064112395	32.2667877189815	166.272422065958	949.801868293434
ARFGEF2	839.384099002928	922.270354349166	944.965694332495	784.930201945826	446.793388575315	116.704048821703	151.677595684305	964.922230457887
ARFGEF3	866.773584391922	802.281504729763	68.0610977578908	381.343338405713	423.024749616161	360.607219627127	294.79075409472	107.973049627617
ARFIP1	803.412921028212	125.858915969729	357.396466657519	770.782655337825	666.853208793327	989.875912666321	593.212418723851	671.582778450102
ARFIP2	595.364796696231	185.118060791865	900.473064742982	164.128266042098	141.200420213863	618.925987975672	647.417896660045	483.871984761208
ARFRP1	205.576659878716	209.383504232392	54.5404001604766	507.83665664494	342.346512712538	186.705108731985	669.253177242354	115.832321578637
ARG1	224.943936802447	484.5359348692	867.362892255187	299.790931399912	444.140852661803	884.556148899719	93.5150948353112	289.543697610497
ARG2	881.005990551785	25.5590006709099	851.017411565408	396.096433047205	641.980329994112	435.4639116209	259.949297877029	343.918249709532
ARGFX	129.717788426206	104.340622667223	213.366978801787	430.078318109736	214.041642146185	50.5783422850072	133.926380192861	339.028153568506
ARGFXP2	641.709874384105	458.685902645811	541.470922296867	680.097301723436	191.448369761929	212.914594681934	856.6450397484	697.326433146372
ARGLU1	68.364369450137	459.566500969231	146.531297126785	299.674045527354	313.67333070375	398.215363267809	958.14434136264	89.3224542960525
ARHGAP1	223.773165605962	17.5882212352008	485.558830201626	431.666217977181	249.048439320177	628.243738552555	855.871571227908	98.7183914985508
ARHGAP10	587.843915447593	913.574140053242	561.581088230014	389.115401078016	281.532173510641	675.856336019933	271.366608794779	437.399962451309
ARHGAP11A	479.123113676906	234.575188020244	284.274368314072	900.633773533627	416.233393363655	693.404745077714	123.671957524493	571.813722141087
ARHGAP11B	184.110749512911	372.597559355199	50.4539792891592	547.182894079015	989.08976954408	607.412088429555	536.781228613108	195.275706704706
ARHGAP12	777.27947384119	445.126597303897	401.762823807076	709.83273210004	146.240830188617	631.37754262425	272.765498608351	23.6329741310328
ARHGAP15	461.556109599769	334.08029563725	512.785422615707	264.751239214092	636.681054951623	137.596961809322	297.090258216485	340.788303175941
ARHGAP17	474.381430074573	666.73584189266	908.729524584487	758.756607538089	689.95373416692	466.717549366876	584.827727172524	429.522182093933
ARHGAP18	423.438130877912	204.188880044967	808.359752176329	437.141137197614	65.0638495571911	934.159608790651	447.25578208454	890.655727358535
ARHGAP19	754.805207252502	938.629948766902	491.905196337029	701.621663523838	597.13864303194	2.40467139519751	464.822193142027	254.181726137176
ARHGAP19-SLIT1	951.775954337791	765.98046394065	661.087529268116	359.907574485987	552.054848521948	142.122803721577	436.034639831632	346.085882280022
ARHGAP20	99.5326447300613	791.464302456006	200.134272221476	506.654309574515	156.808014493436	957.763492129743	963.30853109248	778.486859053373
ARHGAP21	863.57212648727	568.340881261975	990.918711060658	94.3138541188091	641.404047375545	106.000526808202	846.139387693256	348.019529134035
ARHGAP22	243.699865881354	127.499327762052	432.605770416558	566.818046150729	901.683215983212	567.805839702487	557.590745622292	951.707107247785
ARHGAP23	401.482979999855	765.755516244099	376.869627274573	837.960481643677	941.428670659661	333.081331336871	107.540691038594	680.047321133316
ARHGAP24	145.78217221424	121.963502140716	790.311105083674	613.306377315894	738.817499252036	141.396667808294	958.936961367726	545.638548675925
ARHGAP25	66.1909815389663	991.316449595615	112.662530271336	664.597153663635	560.954017331824	202.32566469349	201.094462536275	709.056711290032
ARHGAP26	306.363907409832	827.64211576432	198.776409961283	112.56314907223	966.554598417133	689.510719850659	479.063233360648	795.439174165949
ARHGAP26-AS1	220.598463900387	566.637121606618	417.595712700859	530.749720754102	432.531831320375	216.952070128173	533.365994691849	296.67327250354
ARHGAP26-IT1	52.4819663260132	238.983495626599	775.421028956771	389.920063083991	451.148142805323	595.012756763026	706.861305283383	269.937961362302
ARHGAP27	118.123366497457	526.899968041107	707.18628144823	175.017190631479	439.998046029359	400.435905903578	111.325874458998	871.560986619443
ARHGAP28	312.137520173565	11.9201594498008	150.600473163649	743.42855787836	468.661289429292	466.007429175079	487.144947750494	382.738824235275
ARHGAP29	43.8378637190908	368.362520122901	938.896571286023	849.637058796361	665.129454340786	503.35628259927	391.023787204176	942.015226697549
ARHGAP30	560.659723589197	234.261273406446	500.905568245798	850.575331132859	856.983142439276	106.390762375668	339.893662836403	703.103915089741
ARHGAP31	376.282957615331	735.767196631059	878.121541813016	63.7241210788488	409.246467985213	245.690781157464	969.101293710992	985.466851852834
ARHGAP31-AS1	451.471324777231	144.644268322736	869.814208010212	841.592886252329	0.957252457737923	88.9150861185044	500.475608278066	207.374044694006
ARHGAP32	784.907524008304	519.278705352917	64.1294994857162	145.933012012392	502.244636416435	735.708883963525	155.231577111408	682.783149881288
ARHGAP33	51.7967480700463	849.989254958928	572.716374648735	137.488358421251	480.39200832136	279.2077367194	678.369741654024	890.004195971414
ARHGAP35	180.947711225599	540.966070722789	286.081620724872	600.111779058352	36.2057485617697	649.109026649967	627.974870381877	948.774905176833
ARHGAP36	635.054559214041	589.030655100942	934.377322671935	700.559221906587	30.196190578863	955.795680172741	785.727700451389	411.214930471033
ARHGAP39	310.746436938643	173.899034038186	754.668890265748	482.080343412235	423.939218511805	401.966313365847	225.294662173837	328.411991707981
ARHGAP4	795.520158950239	894.445629790425	309.478796320036	994.501378852874	715.591493062675	49.2668189108372	706.65837591514	123.338111909106
ARHGAP40	109.566046623513	104.447359917685	227.113361703232	503.810104215518	212.023838656023	427.347012562677	909.685273421928	283.885937649757
ARHGAP42	325.7052723784	596.990055404603	593.646979192272	634.05233528465	737.436321098357	672.927631530911	757.747444557026	669.214270077646
ARHGAP44	857.096891151741	790.552782360464	599.314271938056	350.200085202232	59.0374527964741	374.318805523217	732.015350600705	505.053383065388
ARHGAP5	216.491134604439	785.551846725866	842.547154286876	381.13701925613	162.209055386484	522.602795157582	104.610698763281	924.597245873883
ARHGAP5-AS1	110.097642289475	284.133959561586	586.015374632552	96.1451174225658	108.297982718796	848.262520739809	254.757732851431	45.3678024932742
ARHGAP6	608.587787952274	991.73518945463	486.446676775813	862.34589968808	264.354360289872	15.6577869784087	435.213664313778	803.45272179693
ARHGAP8	374.974345322698	429.528868990019	130.388778168708	373.746602097526	355.90554936789	204.571809619665	797.639006748796	409.83058931306
ARHGAP9	92.3774095717818	20.1875285711139	719.824550440535	39.097763132304	508.444592589512	975.263737374917	331.824374850839	302.434127312154
ARHGDIA	97.4523571785539	46.0130751598626	430.278853978962	854.630169458687	384.680535411462	130.220413673669	205.980271100998	976.083862362429
ARHGDIB	574.578313855454	5.26376953348517	935.640294337645	819.204933010042	610.672135837376	801.384004531428	627.102859551087	346.08545480296
ARHGDIG	501.23894889839	925.679930485785	458.475173916668	311.275439802557	426.67011031881	960.046813590452	54.6703536529094	652.787382947281
ARHGEF1	167.798852780834	832.066150847822	379.860026296228	808.954724809155	952.348252525553	298.094834433869	953.389686299488	608.218152308837
ARHGEF10	428.852258948609	410.278063267469	263.837113743648	438.347741495818	516.110850963742	141.392273828387	688.615927472711	67.1644313260913
ARHGEF10L	529.498995281756	744.384759571403	983.023528708145	834.229998989031	325.110921636224	190.294000552967	6.52681663632393	27.3764659650624
ARHGEF11	257.042859215289	443.557269638404	289.232014445588	55.266774026677	651.330829365179	312.121874885634	988.213871140033	118.951293639839
ARHGEF12	941.640615928918	145.760675892234	117.246290436015	276.156198466197	815.468419343233	329.309791792184	612.727066967636	232.441025320441
ARHGEF15	24.0129141602665	152.640209067613	442.178141791373	816.539384890348	376.667032251135	714.505329495296	418.955909321085	657.022930448875
ARHGEF16	149.845729582012	965.36939824	334.907371085137	682.680572150275	875.808466924354	101.147027453408	56.2775474973023	662.586067337543
ARHGEF17	240.541898645461	863.159969216213	281.506362138316	612.116384552792	872.027250705287	728.172180475667	289.448183961213	753.00140841864
ARHGEF18	722.624767571688	598.10478403233	821.514084236696	746.673620771617	572.664340725169	721.666917437688	305.891001364216	496.917857788503
ARHGEF19	161.986337276176	288.724662270397	981.422676937655	389.59283195436	323.632690357044	676.719013601542	898.456633323804	80.0011185929179
ARHGEF2	920.818834099919	289.713659090921	390.786340925843	598.259053891525	244.481024798006	331.405918346718	826.265751151368	735.108203487471
ARHGEF25	524.035464506596	72.1837268210948	489.498173817992	860.394491581246	541.6022723075	589.187923353165	998.294556280598	594.603586243466
ARHGEF26	131.997782271355	707.361136563122	861.381101422012	74.9749199021608	83.1722025759518	739.407603396103	48.9313073921949	494.21807937324
ARHGEF26-AS1	805.670869071037	827.547331806272	402.452675858513	177.265845239162	22.8761329781264	965.419764630497	15.2196530252695	862.20014677383
ARHGEF28	362.341166008264	536.566133843735	702.337514609098	521.356505108997	573.110590688884	73.7509988248348	533.555635483935	371.239401865751
ARHGEF3	969.187834532931	173.359722597525	282.488481607288	629.375511780381	298.711356939748	729.234184836969	501.69939105399	781.822364311665
ARHGEF3-AS1	291.773953242227	603.108655428514	503.902655094862	240.129976999015	940.734059549868	620.647671399638	754.877341212705	528.781933477148
ARHGEF33	404.43267300725	937.86121555604	533.596036257222	928.374705603346	689.486660994589	555.904311360791	895.040169591084	2.31129815801978
ARHGEF34P	537.115094950423	994.10670180805	783.195920521393	231.987257488072	525.681492639706	382.56772281602	644.706517690793	284.779272507876
ARHGEF35	594.956378918141	81.3613135833293	857.896210858598	337.137824157253	197.380061727017	198.059003334492	309.513989835978	879.099778132513
ARHGEF37	728.155708871782	182.60825285688	118.165692780167	204.079394927248	955.432432238013	220.79146001488	214.841369073838	731.747055891901
ARHGEF38	568.310243310407	190.039080567658	712.478478671983	247.884233249351	440.161913866177	527.21975534223	344.823205145076	536.644903477281
ARHGEF38-IT1	213.67817861028	723.687375662848	990.559278288856	770.303431898355	130.263504339382	559.787278529257	711.095821578056	564.341107849032
ARHGEF39	986.332757165655	856.472695944831	658.425813773647	522.952069994062	496.423241216689	140.26811439544	273.027931340039	454.975916305557
ARHGEF4	49.6674180030823	929.218559293076	324.087384389713	26.3860919512808	323.368482291698	741.590018616989	626.921718474478	231.069462606683
ARHGEF40	111.651784507558	900.09124414064	707.895756000653	320.393240544945	446.318204747513	710.93757613562	193.630855064839	305.240199668333
ARHGEF5	264.125946210697	630.512805189937	724.493602057919	381.376208504662	934.015067061409	349.491617642343	290.30919726938	357.279235962778
ARHGEF6	731.931608635932	16.6983164381236	775.767008308321	435.76276069507	8.61400295980275	120.910319965333	556.035783374682	924.47669361718
ARHGEF7	310.196876293048	375.511586898938	295.210898621008	985.607959562913	361.341639654711	272.888327948749	835.806273389608	56.9153872784227
ARHGEF7-AS1	300.026683835313	937.544759130105	707.948547089472	272.49399991706	40.1715801563114	757.646034471691	355.080969864503	765.80225978978
ARHGEF7-AS2	718.642473220825	136.247410206124	964.628896210343	286.209739511833	792.427758220583	408.741796854883	875.102415215224	681.35178857483
ARHGEF9	162.059359485283	122.129572322592	359.609455103055	461.304442957044	704.100378556177	60.3505210019648	17.2748467884958	348.159165587276
ARHGEF9-IT1	629.317242885008	580.370579147711	90.4002806637436	901.510707568377	211.070802528411	431.245248764753	792.258330853656	610.898206476122
ARID1A	255.894818110391	858.106509316713	45.0447958428413	207.34323374927	929.343052906916	127.601789543405	648.423055652529	135.267911944538
ARID1B	87.3148976825178	777.444047853351	463.835119036958	332.7484682668	778.443860821426	334.866367047653	916.0445346497	676.191663136706
ARID2	80.0862908363342	534.270049305633	215.822209138423	929.749689530581	409.120964584872	496.54178111814	418.905906146392	509.676908608526
ARID3A	705.375434830785	395.084850257263	219.468685332686	530.013068811968	712.985138874501	290.121536934748	775.141239864752	419.119822094217
ARID3B	90.444348519668	743.244329467416	373.071916634217	938.433430856094	971.982319373637	827.721514506266	239.137138938531	639.976751059294
ARID3C	473.68686250411	598.115462111309	306.213647592813	448.981000343338	207.910488126799	998.18471679464	878.52272274904	952.762834494933
ARID4A	746.871148236096	87.2753502335399	334.909891709685	714.298796607181	247.188215143979	144.041845342144	664.651070255786	455.853902036324
ARID4B	959.821994649246	32.2393928654492	584.627426462248	41.138062486425	727.258292492479	721.830444410443	385.11803955771	686.694272328168
ARID5A	557.338777463883	212.749119382352	872.167820110917	620.701980777085	567.375099984929	942.913794657215	140.033968258649	427.482386585325
ARID5B	587.444250937551	940.950476797298	564.21278626658	927.557753864676	401.779340812936	453.682646155357	880.328991217539	971.141117159277
ARIH1	371.184323681518	14.3628467340022	300.935649080202	975.624752929434	644.316294463351	52.3478554096073	865.649307146668	594.904749421403
ARIH2	966.457421891391	448.085470125079	797.784104710445	165.528231533244	727.226057555526	94.3393800407648	485.303523717448	31.1733211856335
ARIH2OS	664.899774827063	121.920146979392	658.505632309243	694.046633318067	308.648043079302	85.1326817646623	907.123042969033	735.231795813888
ARL1	819.547939114273	276.058981660753	153.233415912837	560.041721677408	784.336392302066	388.625267893076	446.971085621044	886.344434227794
ARL10	754.46110824123	799.758750014007	83.5330681875348	19.1167320590466	169.553933897987	484.564487356693	529.44748615846	982.726119691506
ARL11	264.81093885377	948.731924174353	719.279795652255	185.470285825431	25.2895443700254	457.630585413426	931.984095368534	668.654923094437
ARL13A	479.4131887611	600.667813559994	447.676877956837	133.526156889275	907.402708660811	653.951566200703	696.225281106308	234.027415048331
ARL13B	507.259710459039	59.6503135748208	260.664209024981	693.581539671868	364.38968568109	263.605368789285	78.7668135017157	193.750714184716
ARL14	342.920890310779	401.810433482751	186.480314005166	969.604670768604	766.20747661218	593.22897461243	786.339449929073	745.126717491075
ARL14EP	197.562166722491	872.827482642606	960.777468979359	62.8720060922205	436.79883889854	695.001072948799	742.285333573818	875.473122112453
ARL14EPL	885.931313969195	676.621200051159	847.668605390936	870.322265895084	44.1872086375952	443.309247726575	141.267006285489	113.370609236881
ARL15	155.928073218092	377.588616684079	388.636242132634	828.815139364451	841.651587514207	285.856223432347	754.670866299421	889.650222146884
ARL16	800.728634931147	971.097108209506	381.553060840815	440.31075714156	619.088768493384	488.599091302603	352.954449132085	783.954072045162
ARL17A	104.088294552639	428.133895620704	932.068795198575	500.131602399051	895.445395261049	394.558360567316	424.835924757645	227.008060319349
ARL17B	410.517721902579	237.571107456461	867.205306189135	452.875519637018	10.8997840434313	278.438574401662	508.936522295699	46.8221718911082
ARL2	518.225837964565	903.676424408332	745.829842984676	971.630478044972	835.173221770674	383.376899641007	966.314351186156	751.424949849024
ARL2-SNX15	65.6650390010327	675.815231865272	104.76107080467	86.3686224911362	32.0618553087115	852.658838964999	733.015868579969	148.786901030689
ARL2BP	52.7427718043327	141.44180691801	428.320351988077	244.014699710533	110.774400876835	479.287368245423	295.124612282962	841.006555128843
ARL3	668.718048604205	6.48027705028653	734.596857335418	824.562316760421	566.317223245278	30.411462765187	28.1689793337137	760.99293353036
ARL4A	13.6674379464239	527.367600938305	783.037587068975	221.33187414147	672.2093350254	970.234856707975	991.770923137665	263.623030623421
ARL4C	841.000957880169	592.103253817186	477.645428152755	746.025166474283	513.852132949978	28.7627000361681	652.075555641204	388.779111905023
ARL4D	41.6776200290769	26.2085639405996	611.668352270499	66.1078698467463	766.966808121651	252.069269074127	72.1526651177555	106.418940238655
ARL5A	246.281379135326	536.343837156892	974.988902220502	407.033359399065	164.425393566489	890.029762173072	452.953787054867	717.307346872985
ARL5B	230.174042982981	17.8822304587811	720.809173770249	163.902970496565	708.968976978213	44.3466815631837	362.151511479169	491.597200511023
ARL5C	877.785776276141	640.415375586599	248.737383633852	912.186765577644	52.5854893494397	869.619535049424	466.345102526248	481.52511077933
ARL6	240.170313278213	50.3868332598358	933.010062435642	844.957579160109	113.463333575055	295.059587340802	829.479652456939	526.949732331559
ARL6IP1	225.975094130263	877.979519544169	87.2256045695394	906.4819465857	562.047476414591	646.807361626998	139.239865820855	745.541377225891
ARL6IP4	269.569462863728	353.645565919578	917.04020742327	400.72201192379	1.11704273149371	895.616957917809	61.2601630855352	195.051547139883
ARL6IP5	987.361291889101	91.21122979559	101.279999827966	993.268345249817	140.441510360688	1.14867789670825	74.9963470734656	300.804476253688
ARL6IP6	385.356501676142	308.415963780135	181.165252113715	590.237234486267	307.043354958296	141.082188347355	9.61029273457825	762.603868031874
ARL8A	518.658912042156	902.188363485038	404.823294142261	657.911273417994	563.526901882142	88.889094768092	224.683031439781	57.5965414755046
ARL8B	500.625773333013	215.131812728941	937.450072728097	10.3321487549692	95.4806201625615	400.283514522016	357.665538555011	71.4756748639047
ARL9	133.932520402595	169.571140315384	721.280430909246	374.035381479189	342.146834824234	646.118757780641	185.864654602483	625.995420850813
ARMC1	865.340692456812	407.695111818612	492.914948612452	971.026583109051	294.166583335027	508.327263407409	255.421361187473	234.471216564998
ARMC10	512.180721620098	724.066079361364	340.805846033618	29.3995440006256	462.296701967716	94.0423982683569	274.480926338583	213.43904430978
ARMC12	877.096305135638	290.71342642419	836.229719221592	793.171006022021	767.434280365705	217.27842069231	819.236129056662	898.55567808263
ARMC2	131.823219591752	875.725674442947	412.989039672539	867.128019919619	979.713939828798	630.86528563872	769.253114005551	270.142203429714
ARMC2-AS1	911.766524193808	916.957906913012	284.839982399717	264.135943492875	557.353561278433	289.422852918506	685.430888785049	626.741101499647
ARMC3	546.107232570648	696.818688418716	49.8751669656485	248.739039991051	981.502709677443	131.079219980165	326.387750916183	500.435166293755
ARMC4	63.5965310502797	156.349398195744	153.223019326106	560.968910576776	918.978810776025	991.458094213158	545.860431157053	834.074571030214
ARMC5	898.565830662847	48.9145198371261	752.36659287475	618.028015829623	19.5040360558778	708.976461552083	641.424941597506	995.894493535161
ARMC6	161.526334704831	276.234376477078	529.807535465807	199.796640779823	746.60880654119	861.06053669937	661.620578961447	370.361357461661
ARMC7	112.356045050547	509.51074436307	772.024541161954	374.521355610341	793.485314352438	682.386960834265	662.057481240481	354.929186403751
ARMC8	813.448098022491	884.529903531075	386.797075392678	483.222615206614	629.819613648579	81.1354180332273	179.249558597803	349.243908189237
ARMC9	39.7072162013501	756.301223300397	616.878452943638	372.379909036681	577.730486402288	51.679183030501	889.555307803676	947.852734243497
ARMCX1	96.2703470140696	186.765756923705	89.1007343307137	565.967240603641	724.783474812284	176.074722781777	460.017137229443	548.49662608467
ARMCX2	548.789698863402	720.326073933393	896.501888288185	205.233334563673	301.867868052796	840.466693043709	146.313989767805	970.243696123362
ARMCX3	97.3271541297436	256.430894834921	204.800087027252	643.023570068181	947.39731005393	456.064618192613	256.975213531405	230.301229050383
ARMCX4	484.93622476235	877.100870013237	687.183171045035	515.887999441475	988.451203331351	187.840843806043	996.353707276285	909.073252230883
ARMCX5	427.031935192645	269.078198121861	867.33877309598	970.519092865288	223.422885406762	835.786433890462	248.443882446736	517.500843154266
ARMCX5-GPRASP2	690.344549482688	311.036214698106	107.294984394684	630.409318488091	746.414844645187	421.199934091419	858.794381609187	966.10588254407
ARMCX6	474.053469253704	625.83091435954	226.646200288087	796.835888875648	955.291731981561	50.5173616111279	912.55863988772	357.436622260138
ARMS2	770.442337263376	632.874567760155	604.474262800068	420.71025329642	905.617716256529	389.239881653339	903.930343454704	5.54704130627215
ARMT1	903.092929394916	20.5302024260163	172.431184444577	674.331447575241	42.015545303002	296.09668883495	927.131495671347	590.906718512997
ARNT	417.352924123406	115.221273619682	446.529767243192	880.443439353257	277.686925139278	147.225628839806	707.215885166079	480.570636456832
ARNT2	79.3258647900075	913.871058961377	670.274245785549	783.334807492793	171.123104169965	204.300418030471	115.46940356493	439.336072653532
ARNTL	316.773587837815	237.715946044773	866.077691782266	323.353800456971	164.520841790363	44.6552124340087	449.464566539973	502.519922796637
ARNTL2	127.557618077844	204.280948266387	76.3392122462392	286.846844479442	452.807549387217	739.66347752139	892.76130264625	263.916197465733
ARNTL2-AS1	859.201759565622	626.566026126966	438.003736082464	164.554880466312	167.318286607042	620.501002296805	620.244536781684	13.7319955974817
ARPC1A	173.37411781773	486.195667879656	228.907975135371	280.252065043896	97.2212641499937	415.608653565869	144.328241702169	343.171716434881
ARPC1B	333.602947648615	281.584695447236	136.750837787986	925.058673135936	502.129565924406	689.811199437827	775.642377324402	299.249057425186
ARPC2	84.9629393778741	407.36994985491	958.869314054027	300.190722104162	316.424543503672	456.375105539337	154.061118839309	844.106526346877
ARPC3	76.3560719788074	279.277465771884	384.358559502289	23.1684308964759	408.828975399956	652.158026117831	267.907224828377	807.608325500041
ARPC4	863.369823666289	809.721452882513	55.579733569175	574.836779152974	853.035756386817	633.527353405952	624.656356405467	135.860360460356
ARPC4-TTLL3	109.852839028463	553.107591811568	499.798718607053	391.194836003706	150.799080729485	53.5978332627565	796.14529851824	8.98987660184503
ARPC5	567.658085376024	681.233820738271	970.805494347587	911.963109392673	845.680268947035	923.139227088541	853.581879753619	473.397728288546
ARPC5L	113.791621988639	310.201705433428	372.721951687708	405.12211015448	397.722702473402	859.111664351076	808.440672932193	646.982204634696
ARPIN	815.463587641716	329.339065589011	702.602899400517	807.926796842366	876.45073258318	961.655014660209	782.999571412802	91.5909602772444
ARPP19	925.196298398077	442.623096518219	96.4531798381358	192.596709821373	372.882435796782	703.90096004121	466.77269320935	608.091436559334
ARPP21	188.448054017499	15.1256069075316	526.833870681003	312.546064145863	248.754980275407	730.959710199386	54.7301864717156	140.057393116876
ARR3	952.154723461717	75.3319545183331	449.633050709963	292.180633172393	409.892495255917	153.191314311698	509.959931019694	191.345609957352
ARRB1	703.2298988197	238.592137349769	998.404822079465	377.060317900032	473.677369067445	696.736403740942	336.726993089542	623.039851663634
ARRB2	848.544819047675	846.240737009794	401.578243356198	719.437513500452	526.876885443926	683.608419494703	910.181022249162	764.59592115134
ARRDC1	684.862116584554	390.496216481552	704.533645650372	440.592049155384	487.429989734665	386.154859792441	199.210891732946	659.21829873696
ARRDC1-AS1	461.771342903376	253.826920175925	521.991460816935	233.196635730565	773.631324758753	575.651637278497	305.657065706328	277.127518784255
ARRDC2	666.05155239813	894.73098423332	98.5600620042533	612.968899775296	61.9513597339392	627.039361046627	97.7462115697563	41.1389886867255
ARRDC3	960.476184030995	761.799883563071	999.824968632311	197.512744925916	101.935473270714	534.020966850221	693.682866171002	409.151379019022
ARRDC3-AS1	621.631894260645	807.488576043397	563.227566890419	976.271801861003	534.365924075246	621.055863099173	269.944527884945	511.609028792009
ARRDC4	676.108865765855	954.945273231715	40.4986389912665	781.955795362592	297.5199802313	226.483222329989	420.50814977847	246.142528951168
ARRDC5	502.350595779717	190.514814574271	351.976667530835	674.8073680792	266.040798975155	217.186078429222	484.393140533939	395.577911986038
ARSA	933.562444522977	204.246429726481	283.650631550699	630.455175880343	843.635944882408	188.519815914333	254.96769323945	13.0966317374259
ARSB	80.7840805500746	522.829997586086	724.629919277504	212.410491658375	617.018996039405	901.799357961863	526.710507227108	888.014459051192
ARSD	970.104193780571	209.669343428686	112.924230983481	536.50320880115	514.480452751741	333.762411260977	126.063731033355	496.341101126745
ARSE	96.0691454820335	314.121309202164	11.2583672162145	333.466249518096	657.813590718433	83.0406504683197	868.08629357256	794.782935176045
ARSF	682.551944162697	362.638566643	74.5098039042205	884.254331467673	311.778089730069	439.838846912608	415.610257536173	851.186393294483
ARSG	887.895758496597	87.9329345189035	844.019507989287	346.748251235113	774.696600856259	869.652862893417	78.7662554066628	970.106140011922
ARSH	10.9781834762543	13.6299019213766	992.896704003215	171.357315964997	50.4663032479584	710.381396347657	28.0128249432892	313.277252251282
ARSI	365.513161523268	910.556219983846	985.132145462558	701.932416995987	267.579897074029	740.361112169921	256.535531254485	713.816403411329
ARSJ	11.4921482745558	661.289677256718	945.98945020698	321.750609669834	374.157476006076	692.165916552767	733.052425319329	663.640268612653
ARSK	668.949126964435	87.0295718777925	146.287397947162	451.585531933233	243.133695563301	431.213549571112	494.861531071365	170.968201477081
ART1	532.855403842404	531.383896479383	314.806682057679	551.850382471457	505.024457816035	732.252575457096	571.086598793045	168.569521512836
ART3	893.397599924356	558.484287699685	792.742888210341	659.080234589055	910.90988740325	698.897043708712	623.248545918614	793.534181779251
ART4	362.799684749916	605.610806494951	232.11492667906	945.302818901837	947.976636933163	479.02305983007	636.533638928086	906.018585665151
ART5	501.697040395811	111.611277330667	354.932228336111	865.253506693989	476.269356440753	288.880967535079	402.103402419016	119.667498394847
ARTN	122.692589880899	644.598882878199	185.832841321826	883.289230754599	426.991177722812	697.714837035164	124.901408329606	223.862871993333
ARV1	459.875753615052	446.598689071834	497.951421188191	850.218441104516	226.809561951086	354.518857551739	444.681707769632	164.858535164967
ARVCF	49.9325674027205	203.765457961708	775.857497006655	538.875788915902	116.81425338611	422.123972792178	97.2179074306041	355.515039991587
ARX	456.008430803195	789.588185958564	294.981755781919	297.174921026453	927.025128388777	482.959329150617	669.492059620097	747.386576840654
AS3MT	257.619641255587	905.29376314953	679.096987005323	574.486525496468	560.002183541656	887.608386343345	922.990146093071	455.649066483602
ASAH1	811.384164262563	598.639935487881	151.717938948423	638.220205437392	894.891586620361	134.432794991881	652.934432029724	402.21509244293
ASAH2	125.274777412415	581.598273012787	250.535390106961	203.057310311124	147.907895036042	515.889105154201	431.58163013868	223.346661543474
ASAH2B	440.11185830459	919.324173592031	568.871162133291	942.04244739376	510.969986440614	163.996604969725	956.036924850196	425.023137126118
ASAP1	81.0408385004848	831.601231824607	236.679484136403	238.296189345419	210.722218034789	199.776845984161	185.021301032975	495.356804458424
ASAP1-IT1	660.983860492706	488.457174738869	860.001273918897	463.294223882258	811.64160463959	150.392428971827	801.582782063633	943.571296986192
ASAP1-IT2	327.979004476219	152.733689872548	478.887487435713	481.690658023581	862.900107400492	463.806261308491	354.43376749754	500.528553966433
ASAP2	670.674123102799	655.614789342508	842.114603612572	507.488264236599	537.563797319308	64.9071191437542	267.999638570473	181.871589738876
ASAP3	659.722084645182	599.216853035614	263.826625654474	872.404959285632	188.600626774132	302.881813840941	20.4626792110503	317.338779103011
ASB1	948.2240753714	691.809626761824	207.184019964188	773.345886496827	73.9935899619013	955.951718147844	71.2842531502247	597.400726983324
ASB10	398.085274267942	292.860383167863	255.464978283271	569.392185425386	525.705085601658	486.615388421342	359.587866347283	605.109710013494
ASB11	426.370669389144	995.333280181512	563.52432188578	848.157066386193	793.820011662319	553.988979430869	469.298916403204	428.378486540169
ASB12	688.945265021175	621.279710205272	36.875989055261	849.290407495573	531.638685148209	279.636977938935	369.032565969974	482.601579977199
ASB13	293.822068953887	718.445824226364	865.340708056465	679.40997518599	193.962154211476	436.61997304298	89.4430538173765	679.545062826946
ASB14	742.913101566955	724.173727445304	958.142944378778	48.3502778224647	72.9938275180757	780.577465193346	117.06060403958	234.962304588407
ASB15	580.633774399757	910.830086097121	399.173221783713	503.218641970307	546.03821085766	364.053244469687	174.414290348068	920.211699325591
ASB16	788.753887172788	588.442611740902	998.844424262643	73.2166841626167	294.898694381118	758.808118291199	283.421006985009	219.180145068094
ASB16-AS1	934.050150448456	825.142638524994	349.873045925051	418.945132987574	967.028209241107	831.515932222828	607.617444125935	63.5551596060395
ASB17	490.510249976069	644.168413709849	742.897461168468	436.454950366169	405.302283121273	348.760155728087	441.119747469202	535.518351243809
ASB18	65.2398278471082	457.22496160306	53.3851790241897	927.140769083053	817.883615382016	779.597821645439	748.906326014549	949.442775454372
ASB2	857.508591609076	523.47598108463	51.481475122273	870.650614378974	940.568554215133	842.232654104009	300.708208698779	570.604665437713
ASB3	201.11345895566	921.358271501958	179.969756165519	163.498823996633	510.825171135366	4.54578129574656	247.909173602238	956.809418974444
ASB4	126.96497910656	316.391379572451	367.345766862854	385.795328766108	466.513471445069	238.195418613032	895.621879491955	974.514694185928
ASB5	111.065309029073	808.459153864533	531.750748865306	451.267517404631	659.29069230333	347.316613420844	721.584160113707	256.541515234858
ASB6	869.289429392666	91.2715750746429	123.633085982874	819.36729233712	115.897684823722	129.461247241125	137.588704703376	246.684148442
ASB7	563.393593300134	788.128834683448	116.923874709755	5.45341102406383	987.161419354379	749.533629277721	800.93708797358	579.842378152534
ASB8	729.358399752527	815.145462052897	745.651175500825	424.096506554633	705.681655090302	233.177189016715	955.058215418831	97.6793828886002
ASB9	44.6066006552428	746.933497721329	298.368264455348	689.977093832567	47.0845887903124	940.540311392397	523.246418917552	685.790114570409
ASB9P1	74.7473964001983	639.20587184839	632.735345745459	256.10919855535	438.347258837894	959.685650421306	462.593833683059	707.297626882792
ASCC1	938.997790683061	688.633517595008	730.127759743482	678.263009060174	682.632486568764	403.957894537598	219.334395136684	504.438346019015
ASCC2	560.764237772673	746.294069336727	458.769423421472	438.535070512444	618.231064407155	584.278425201774	967.273969668895	848.922210978344
ASCC3	512.38167588599	419.600276043639	226.462612394243	425.879759015515	629.523161100224	103.024776792154	0.84561831317842	240.880717290565
ASCL1	76.6908249352127	489.136202260852	695.311271119863	603.911387966946	502.931557362899	927.194331306964	226.38609376736	483.373127644882
ASCL2	144.624672364444	820.429877378047	45.1735586393625	858.103372855112	774.868971668184	818.525834707543	952.06300332211	476.023353636265
ASCL3	169.254909735173	736.776305129752	659.1523187235	775.124708656222	318.567559123039	459.817051887512	801.264228066429	600.805527996272
ASCL4	740.725363837555	780.881920363754	768.429202027619	803.68829285726	718.365099281073	741.279286565259	381.547898286954	574.956679251045
ASCL5	299.878930905834	970.400632591918	838.472625706345	673.504895530641	740.615735528991	375.540606211871	228.223867481574	928.635887568817
ASF1A	300.729031674564	795.915516093373	673.121130326763	663.188883569092	833.468474913388	670.183829031885	50.548383500427	905.976413981989
ASF1B	302.399273496121	50.5255761090666	863.079226575792	237.0370994322	82.1531959809363	324.351517017931	328.018703963608	252.663603983819
ASGR1	433.203591033816	265.994433779269	331.547700567171	689.123440999538	200.881786178797	498.98879812099	911.619806662202	767.974391113967
ASGR2	133.790923282504	484.838899690658	273.654819699004	267.927354667336	682.734485249966	183.234267868102	14.9017760995775	560.087104793638
ASH1L	285.243105376139	363.786003785208	584.48158740066	277.549636550248	230.637955246493	882.169134682044	46.9380237627774	422.752934042364
ASH1L-AS1	162.094250554219	963.924268027768	409.712589578703	195.777710527182	920.30400200747	57.9446945339441	423.407400026917	285.118086962029
ASH2L	704.629125539213	733.127061044797	780.344874132425	582.570064114407	480.744594475254	388.535543810576	557.608226547018	623.959150630981
ASIC1	783.945645904168	105.85666145198	197.358524659649	867.352257948369	270.778294885531	407.336344243959	912.634621374309	198.57346219942
ASIC2	640.741098672152	96.8790566548705	108.494924614206	409.06071360223	553.683998761699	531.7870862782	892.240181332454	423.550231847912
ASIC3	127.558554755524	190.594101790339	973.546086112037	896.684919018298	42.444403283298	959.0286584571	56.7109026014805	514.467373723164
ASIC4	344.286886276677	920.276336371899	607.976677827537	985.835132189095	913.058642297983	623.994190013036	501.327075297013	525.235885987058
ASIC5	781.029483769089	477.248310809955	490.729492157698	284.658742137253	619.701587595046	43.9472110010684	377.385764848441	838.865089230239
ASIP	512.247683247551	583.319341531023	668.100524460897	587.766408687457	24.6645817533135	535.738865146413	45.2888433355838	508.680063067004
ASL	134.301008889452	803.417708491907	767.391990637407	866.810667794198	978.047012351453	286.421977682039	612.616681260988	802.345412084833
ASMT	970.926430774853	905.363760888577	295.57395610027	134.439771994948	187.884817132726	786.498229717836	46.2275252211839	683.815250871703
ASMTL	298.112306976691	614.568058867007	475.346488179639	649.597204523161	496.411516796798	634.059868520126	868.055144557729	98.2431340962648
ASMTL-AS1	220.795481000096	851.277305046096	679.219809593633	441.522334236652	256.206227000803	288.475199602544	652.944257948548	776.09134465456
ASNA1	151.494846213609	328.4049378708	206.022510770708	111.655682092533	667.383321560919	738.696534652263	123.393161920831	344.477655598894
ASNS	856.055398704484	925.11791549623	408.747994108126	157.14493021369	131.662731291726	670.468618394807	938.238572562113	639.50082170777
ASNSD1	132.744735339656	946.461112238467	58.6459299083799	54.1676182765514	839.401832781732	177.869171602651	767.370944377035	779.8595901113
ASPA	695.002987980843	250.000130617991	346.274014329538	944.784758845344	289.512533694506	727.910578716546	468.380102189258	589.837111765519
ASPDH	427.671393146738	799.32934534736	742.357932496816	150.270313490182	573.600268689916	188.605945557356	799.87310548313	216.14726819098
ASPG	435.309739317745	922.304219799116	537.0164278429	529.717153171077	273.282178211957	193.264612695202	794.599645305425	412.312379572541
ASPH	118.587769335136	16.5682428050786	817.605896852911	219.530428061262	561.321234796196	66.9669394847006	325.168661074713	768.721954897046
ASPHD1	292.892738012597	97.1143234055489	457.534557441249	212.908890331164	581.429645884782	129.161419346929	917.325722053647	640.966257313266
ASPHD2	474.364888388664	138.209322933108	523.255961248651	103.635292034596	37.2220259159803	61.2048485781997	619.454728905112	980.67494481802
ASPM	915.387558052316	692.914630053565	90.2199456468225	50.9536960162222	44.2190964240581	679.350740741938	404.260285198689	576.329762581736
ASPN	378.128363750875	115.785067202523	873.424034332857	81.9258876144886	237.114100484177	389.068477321416	9.85588994808495	531.249702675268
ASPRV1	815.693319775164	297.219606349245	687.581315170974	848.350556800142	6.78778579458594	95.3837411943823	545.219518011436	357.620761729777
ASPSCR1	719.037224305794	818.481362657622	969.562079757452	992.72484681569	389.692137017846	722.85914956592	598.837917204946	546.461446909234
ASRGL1	107.317986199632	309.369878377765	680.125003913417	343.504586955532	495.731497416273	554.277571616694	962.842429522425	309.990469831973
ASS1	310.655103065073	135.171998292208	722.985758213326	769.852960947901	226.817813701928	358.258526306599	167.455455521122	801.794392988086
ASTE1	714.426431339234	839.955683099106	413.492813007906	413.927686866373	710.165836615488	932.726098457351	13.8785385061055	246.966746868566
ASTL	689.182393951342	708.85473000817	172.483384842053	343.776813009754	966.99147624895	405.57048167102	219.496770994738	851.281058043242
ASTN1	663.226309465244	473.046581493691	677.822588710114	832.231496460736	138.470178935677	173.869339283556	526.420950191095	115.449879784137
ASTN2	78.4430676139891	774.116012034938	487.305944319814	292.632874799892	561.371273593977	743.372126948088	854.296231176704	36.1332793254405
ASTN2-AS1	40.5726244207472	359.035607660189	180.851504439488	949.568892130628	341.274110600352	628.495779354125	204.934260109439	935.011659516022
ASUN	195.055805146694	866.18725862354	604.054733645171	268.414768157527	977.429692400619	581.937610171735	722.116063348949	748.417588416487
ASXL1	868.832050124183	365.008303895593	281.36882209219	643.44200771302	739.316332386807	871.322153601795	990.322826197371	403.195056598634
ASXL2	807.070851325989	420.502185355872	966.804674360901	19.6021480951458	537.692478857934	155.543523374945	13.8010021764785	55.600011954084
ASXL3	813.952406169847	699.915961362422	239.651780109853	140.155736589804	88.3839146699756	343.473462853581	338.044087169692	957.43080903776
ASZ1	848.619407974184	930.837339023128	472.488673403859	49.2514907382429	438.391623320058	909.122261684388	15.6577883753926	842.526650289074
ATAD1	55.9120478574187	330.052745295689	434.992763679475	438.693178351969	381.622772663832	394.487056648359	437.899407697842	806.905930396169
ATAD2	95.8578882273287	687.577484408394	510.128036374226	348.965621320531	757.538843899965	319.831416243687	464.761818293482	508.811472915113
ATAD2B	212.193886982277	649.03867454268	484.722131863236	762.093416415155	85.0337813608348	125.982549972832	616.482558660209	844.832259695977
ATAD3A	900.640929816291	185.412232996896	471.757670864463	792.197731556371	833.071181783453	478.025970282033	79.8234567046165	468.542902031913
ATAD3B	168.065014993772	973.354881862178	12.4918695073575	513.192564947531	17.6152258645743	922.114298678935	902.255207300186	829.995927866548
ATAD3C	641.143682179973	943.456840468571	784.486700547859	620.154771720991	503.052884247154	909.040060825646	363.189747789875	665.400579106063
ATAD5	438.870098441839	271.738511743024	8.74187843874097	720.13689414598	890.256038168445	303.630899870768	569.957445608452	805.351261049509
ATAT1	406.808637082577	729.15837680921	569.371070945635	949.002074310556	54.9259562976658	610.557112377137	703.734365990385	188.447373220697
ATCAY	503.685037372634	949.343904387206	503.264792962	147.560255834833	715.652561513707	638.166942633688	803.326666820794	683.994234306738
ATE1	612.580704502761	715.714402263984	724.508473882452	777.83066383563	90.3124306350946	26.6028568148613	530.983007512987	817.654560320079
ATE1-AS1	651.355997426435	636.271714698523	557.036198209971	78.7409611511976	176.796313840896	727.093054912984	824.465170735493	614.871291676536
ATF1	984.671526355669	804.849393898621	488.121191039681	428.594835335389	513.442274183035	497.73710872978	778.143072267994	642.013768665493
ATF2	961.353359511122	30.2610294893384	116.529664723203	371.462553273886	46.1069534067065	212.744637858123	965.907886391506	663.600984960794
ATF3	59.5243095885962	128.173564327881	274.952499195933	36.3482099492103	273.790998151526	205.892755184323	527.580894296989	177.52611101605
ATF4	377.3053442128	750.418867217377	160.145294386894	810.857655713335	971.646212041378	47.8745892178267	768.694553524256	741.393302334473
ATF5	669.82129169628	906.286274315789	526.38949919492	48.8157586660236	22.5115939974785	949.687535408884	544.295509811491	99.5456043165177
ATF6	188.725708751008	31.8423579446971	270.572444656864	481.737619964406	74.8064750805497	377.157514216378	748.010638868436	425.72900489904
ATF6B	351.869975682348	680.530355544761	256.47795223631	646.677306154743	227.499777916819	534.310319228098	199.629332870245	179.256963776425
ATF7	661.050276365131	40.396454045549	8.84090200997889	225.935352733359	977.182857692242	537.449768744409	497.784551465884	839.292382122949
ATF7IP	787.156731123105	779.050228418782	700.930771417916	140.253577614203	563.050967641175	40.6224029138684	80.589942401275	625.584594206885
ATF7IP2	491.220627445728	14.8698238190264	405.727467034012	574.93172888644	23.1629307381809	417.583454865962	145.048318663612	874.208241468295
ATG10	484.242232283577	355.782453203574	934.776986483485	888.206750620157	986.462068511173	649.173846235499	901.855323230848	617.994383210316
ATG101	433.499252889305	413.383443374187	941.459033405408	948.566073318943	90.6330773141235	971.354239154607	708.150934195146	837.02907525003
ATG12	751.180244144052	918.942141113803	742.85304127261	898.620581487194	585.288496688008	796.047628158703	896.137150702998	65.9535597078502
ATG13	337.632389971986	433.558036340401	432.052767835557	254.898694343865	112.117340089753	589.7859307006	11.4007310476154	592.698983149603
ATG14	45.6398262176663	525.583083974198	227.641004370525	770.239419769496	780.155585380271	625.91936183162	831.193276681006	860.921714920551
ATG16L1	935.268515488133	158.254996873438	212.242363020778	957.111981930211	670.385156292468	936.147923115641	928.105922415853	225.485441274941
ATG16L2	419.368901289999	546.320497756824	932.409546105191	668.417245615274	858.628552174196	561.223810305819	165.728190913796	654.539912706241
ATG2A	911.960413912311	506.524347700179	910.771005786955	650.956586934626	448.504282161593	201.64855173789	258.325870381668	863.585338462144
ATG2B	723.380568670109	174.24480849877	241.615012753755	470.80261236988	81.1352722812444	749.578938819468	85.8541035559028	687.56909086369
ATG3	148.242577444762	617.126653436571	3.23792803101242	346.647131955251	393.005843274295	397.734425961971	57.8040508553386	365.495926933363
ATG4A	559.632903896272	863.548122812063	341.92378516309	685.545168351382	353.926767129451	229.829010553658	468.110307119787	422.810796182603
ATG4B	159.058325225487	136.921038385481	169.176947558299	631.19447696954	404.218909097835	564.783398760483	562.791175441816	624.544979073107
ATG4C	376.58899044618	72.6414888631552	869.856484699994	222.124481806532	343.227638397366	835.499783279374	555.624834727496	123.773414874449
ATG4D	621.989995008335	468.809027224779	748.501356458291	868.064457317814	930.811822880059	703.219026094303	863.808358088136	271.443913225085
ATG5	591.777593828738	601.283191936091	397.971872473136	423.579163616523	771.994494600222	511.015611700714	319.107925053686	9.30596166290343
ATG7	860.50770804286	702.625810168684	973.690460436046	642.889407230541	215.381011832505	169.381086947396	730.131736258045	787.978443782777
ATG9A	76.7355468124151	31.6494186408818	791.306169237942	230.751848313957	853.10577461496	69.8779600206763	998.22624027729	275.650268187746
ATG9B	737.330836243927	312.710147351027	820.307491580024	802.59916279465	303.076945478097	529.089886695147	317.805525613949	66.4675619918853
ATHL1	219.141989015043	336.73403551802	27.5995624251664	191.034072311595	175.061050103977	642.886615358293	170.629251515493	820.417159702629
ATIC	8.22133873589337	199.246225878596	492.260450031608	895.720281638205	108.008627314121	601.020412985235	132.677776506171	592.799756908789
ATL1	299.035487230867	245.556603185833	815.469985362142	749.404220841825	968.09753915295	466.140132863075	81.7561531439424	431.932680308819
ATL2	531.993439653888	755.946401739493	893.31214944832	308.848806191236	525.44684545137	104.743889067322	244.24484744668	979.514474980533
ATL3	374.907675897703	492.370849009603	903.519756626338	370.799900731072	672.62147506699	243.846684228629	598.790726391599	965.318253962323
ATM	189.499262487516	726.305834017694	55.160770425573	371.233232552186	834.920429857448	948.193220188841	899.956748820841	495.709574082866
ATMIN	857.000171905383	65.8596735447645	967.065071221441	356.377063319087	180.089979432523	60.5423534289002	277.124290820211	75.2886487171054
ATN1	949.108532397076	213.455825345591	575.311715016142	479.19114981778	845.280173700303	921.32973507978	399.250759743154	844.282913720235
ATOH1	964.666236424819	472.878898028284	630.893150577322	829.972158651799	904.235907830298	731.339707504958	234.031452331692	437.826998066157
ATOH7	690.695668803528	694.608431076631	758.053000317886	404.31450214237	25.1798329409212	969.454696867615	3.33058764226735	11.3225844688714
ATOH8	745.367701165378	507.222483400255	710.596906486899	314.166302559897	852.146381977946	728.904590243474	110.509816091508	254.898215644062
ATOX1	852.086110506207	443.803496891633	962.021029554307	548.853324959055	917.052067583427	312.139517161995	131.181489443406	393.421664601192
ATP10A	38.4331296663731	70.7616358995438	486.775672994554	724.443732993677	321.730261901394	404.501721728593	17.4402166157961	712.084467057139
ATP10B	114.738153526559	657.859569182619	544.057235587388	817.36378907226	399.688947247341	352.598504628986	288.757973350585	54.7926707658917
ATP10D	192.997574806213	628.235603217036	42.1163167338818	939.770005177706	651.657368289307	102.930042892694	824.408901156858	152.690407121554
ATP11A	186.927975388244	146.971537731588	341.257183114067	898.697204422206	194.665535585955	923.801426775753	868.49539144896	822.770182741806
ATP11A-AS1	456.469914410263	883.144344668835	59.7122185863554	304.818826494738	820.733600063249	543.255158234388	60.5022390373051	106.589298928156
ATP11AUN	749.754028161988	381.176025141031	878.127107163891	718.483656877652	745.857342379168	455.048126168549	672.931815730408	85.8621709048748
ATP11B	594.438242493197	293.750206474215	360.721003264189	675.662379944697	955.200993921608	599.643289577216	368.951588170603	295.783202862367
ATP11C	133.437570650131	214.376157848164	103.318023495376	536.132612265646	26.3212253339589	669.812422711402	336.72929299064	952.596453484148
ATP12A	169.437595177442	104.228488868102	535.239150049165	528.768287273124	23.8880938850343	808.82016941905	578.083385247737	826.5898860991
ATP13A1	479.994429275393	171.314522856846	498.966918559745	334.589000558481	261.647864477709	511.825213208795	244.056681869552	475.058179814368
ATP13A2	7.30803329497576	710.085206665099	808.773478027433	970.418893033639	364.473930327222	930.981296347454	587.818084284663	24.3280932772905
ATP13A3	563.214864814654	548.90727205202	319.026067154482	976.699852384627	973.421775270253	107.706948649138	975.198873784393	359.753765398636
ATP13A4	604.287629248574	132.224371656775	785.14140821062	948.146201437339	1.31488195620477	301.494461251423	993.477085139602	126.016981666908
ATP13A4-AS1	796.746344771236	190.651688259095	211.433408316225	468.775621149689	454.298263881356	402.852340368554	874.760374194011	179.638256318867
ATP13A5	790.757220936939	738.463584100828	759.407801320776	514.98012105003	502.931696595624	648.225995711982	537.139998283237	464.34141183272
ATP13A5-AS1	862.843382405117	182.326668407768	63.9774920418859	197.481090435758	7.41352466866374	191.624790430069	327.576333889738	38.2674094289541
ATP1A1	209.474277216941	99.3881174363196	947.458635782823	303.847934352234	151.454577222466	829.724586103112	443.583200452849	268.324130214751
ATP1A1-AS1	136.440269416198	209.979732288048	742.213154910132	185.087252873927	243.520200951025	905.632124748081	1.09803676605225	774.001693120226
ATP1A2	786.399013362825	600.521746557206	593.744118465111	184.542707400396	213.205748237669	983.812183141708	542.107271961868	819.458024110645
ATP1A3	955.721583683044	638.931240420789	78.3299994654953	178.396890405566	269.455274334177	32.0170170161873	870.357156265527	245.091822464019
ATP1A4	298.302624374628	733.964846935123	398.376014782116	85.4572164826095	810.631314059719	946.611903375015	625.099022872746	148.915890604258
ATP1B1	67.3004589043558	174.850638024509	557.9166659154	170.368964085355	220.408664317802	84.9743571598083	506.250979145989	759.72009357065
ATP1B2	100.09902715683	855.845879064873	314.333372283727	592.85399550572	639.482230879366	666.226231958717	38.7288669589907	673.556689172983
ATP1B3	840.085461502895	827.223270433024	484.398096334189	255.660843569785	870.906308293343	38.1404822692275	112.065113615245	617.491786135361
ATP1B4	909.209091216326	328.997856238857	21.4645506348461	434.802177129313	302.202449413016	305.984161561355	796.297610504553	237.26510326378
ATP2A1	897.176203550771	745.51443499513	164.119618944824	446.446240879595	565.53476722911	586.332719307393	399.114198749885	30.3027948830277
ATP2A1-AS1	733.724613673985	823.391405632719	511.013691546395	382.684509269893	889.842926291749	711.726744193584	822.222239337862	544.5227897726
ATP2A2	629.89131337963	945.276449434459	727.152980165556	341.359736165032	259.607981657609	17.0445579569787	524.532106472179	178.109299857169
ATP2A3	579.1665550787	466.951408889145	922.662737779319	244.10451692529	451.751944608986	704.491622978821	641.640382353216	590.620519826189
ATP2B1	415.322587359697	443.343929713592	939.295484451577	406.200245721266	543.480379041284	808.229753514752	613.615210168064	977.978435112163
ATP2B2	939.271086128429	323.786018416286	288.80144096911	190.412858035415	605.394886340946	788.377210730687	430.297396844253	763.783884234726
ATP2B2-IT2	241.009397665039	247.234613634646	948.588407365605	92.6897886674851	652.404135558754	191.037692828104	416.811935603619	35.6982271187007
ATP2B3	303.660605568439	704.480070853606	417.204892262816	689.320210833102	445.15633652918	662.694039056078	506.928468355909	55.2690727636218
ATP2B4	117.019991390407	722.94798004441	929.541909368709	671.858684392646	261.535509023815	995.595199987292	480.887019541115	370.626229792833
ATP2C1	949.676579795778	565.145920263603	365.320072276518	324.231221107766	670.483225956559	143.086096271873	782.161409500986	865.214413264766
ATP2C2	518.657504580915	909.041173290461	237.05533775501	160.616612061858	444.583517964929	848.029226996005	232.516701100394	802.835925249383
ATP4A	584.934437414631	578.342970693484	889.652706682682	987.817093497142	184.24179777503	0.677957898005843	297.807134222239	45.8167137112468
ATP4B	660.846854792908	719.188784016296	760.215573245659	802.699583349749	13.575799530372	304.718864150345	201.079023303464	754.319273866713
ATP5A1	90.0297830812633	925.493672722951	618.727512191981	767.865761416033	59.5139293000102	688.761356053874	936.256920685992	494.153635809198
ATP5B	27.1299371961504	703.465564642102	522.721693152562	978.688590228558	609.263744205236	404.839016497135	587.482960894704	532.658917130902
ATP5C1	880.16089098528	743.552171858028	567.382803186774	114.990896778181	870.004808763042	842.095544794574	243.936821818352	711.614784318954
ATP5D	849.20182870701	161.218764027581	333.177835447714	257.864223327488	890.517641557381	630.035163834691	819.30568232201	423.541330033913
ATP5E	249.136690283194	585.116281174123	129.691850626841	859.519524732605	781.987917842343	169.473202899098	864.521861309186	302.752452204004
ATP5EP2	139.750825241208	554.116280283779	245.088861091062	672.366184648126	891.677483450621	639.245135011151	613.90549945645	511.686481302604
ATP5F1	894.754679873586	719.032007036731	197.40986963734	32.8835074324161	531.909114448354	454.627917381003	246.55654001981	462.224624818191
ATP5G1	544.719925848767	684.041787870228	378.389432327822	58.3105890545994	820.322529179975	41.6479131672531	827.834858791903	327.082854462788
ATP5G2	220.529872924089	159.718944458291	982.618267182261	878.076599678025	314.298883080482	960.73843119666	13.6558106169105	583.679642062634
ATP5G3	961.443464271724	770.093698287383	698.940192349255	168.261578772217	164.258402772248	614.747527288273	459.930646931753	614.007594063878
ATP5H	446.656681597233	645.072507672012	816.229446325451	605.624400777742	220.38675728254	316.146381897852	971.702621085569	472.077379003167
ATP5I	515.416861977428	690.709275426343	887.264788383618	870.405315887183	940.562284784392	889.037081273273	278.948337072507	825.361648341641
ATP5J	779.157887678593	923.456878168508	867.906727129593	364.768662955612	688.468850916252	316.943776095286	956.773051293567	458.825840381905
ATP5J2	764.217640506104	184.493737528101	107.357568107545	984.213708434254	41.1448187660426	521.828200435266	837.066754000261	117.281125625595
ATP5J2-PTCD1	992.819381644949	38.9349169563502	150.220368755981	242.606360465288	197.787695098668	920.202541397884	53.1808082014322	372.854043962434
ATP5L	918.412843253464	562.818372622132	383.799573639408	635.967663489282	351.642604218796	628.867820370942	490.602857898921	551.644627936184
ATP5L2	140.476711792871	275.156074436381	991.113825002685	333.429579623044	490.553729003295	568.224836839363	385.222319979221	266.633931780234
ATP5O	134.1836261563	205.816276138648	164.748737821355	785.865963436663	714.242204790935	972.955244593322	771.172489970922	98.2780260965228
ATP5S	389.570112107322	568.660859717056	879.474075743929	853.945177281275	213.588027050719	434.693051502109	483.178263762966	974.093208322302
ATP5SL	28.5362091381103	826.642441330478	587.011997355148	256.904873298481	603.173415642232	31.0996489133686	29.6945590525866	605.373750440776
ATP6AP1	734.654274303466	224.427054869011	735.936423996463	70.057597476989	450.006490573287	546.769869048148	42.5531861837953	3.22392117232084
ATP6AP1L	559.88604016602	822.266977280378	476.401283405721	817.251950269565	600.059556541964	691.590353380889	470.99365782924	928.875402314588
ATP6AP2	801.412947708741	433.924758573994	620.897554559633	384.40847559832	899.073788197711	398.158309515566	964.889370137826	161.566768540069
ATP6V0A1	706.161084584892	373.882357729599	22.3488733172417	552.652821177617	491.718693403527	342.478698818013	494.785710936412	307.766864076257
ATP6V0A2	579.987164586782	132.253988878801	598.678938578814	632.883218117058	126.419831532985	801.233291160315	913.616190198809	353.549758438021
ATP6V0A4	747.103483183309	308.122910326347	359.241233440116	61.6489795502275	824.644550913945	129.440425196663	580.034794984385	743.556593777612
ATP6V0B	154.409148963168	858.659508172423	645.094484090805	543.921723030508	986.920705065131	16.6338137350976	76.3093510176986	739.775035530329
ATP6V0C	921.278698835522	477.044452214614	111.632516840473	259.997861692682	481.48418776691	508.99343774654	740.694804582745	709.618300432339
ATP6V0CP3	730.254146270454	443.330853246152	498.397081159055	486.991418059915	890.28766611591	599.762548459694	874.67379309237	27.2670274134725
ATP6V0D1	871.559485094622	111.953959334642	441.012805560604	795.151382219046	752.923030871898	868.196523748338	126.128234202042	991.768992505968
ATP6V0D2	41.6918725240976	609.092751517892	225.74091819115	366.42044573091	748.493873514235	934.974023373798	950.311755063012	714.896087767556
ATP6V0E1	848.059938754886	751.413007033989	764.420631807297	24.4791561271995	5.48937218263745	211.027384037152	587.206724565476	173.842274816707
ATP6V0E2	241.688570939004	831.703684991226	1.4211789239198	736.577620264143	498.766297707334	279.210898093879	247.29695986025	363.917428767309
ATP6V0E2-AS1	676.022646483034	499.832497676834	186.652984237298	500.328215537593	321.880783885717	227.290206355974	730.052968719974	184.932998847216
ATP6V1A	8.85865464806557	971.969352802262	68.8527652528137	703.530387254432	620.931500336155	507.741887355223	116.073607932776	113.574808929116
ATP6V1B1	869.586089858785	83.5925678256899	548.771962989122	153.907919768244	996.752036735415	539.046115474775	529.377802740782	863.80318691954
ATP6V1B1-AS1	862.10667877458	449.822259601206	839.632508577779	385.872693732381	241.010728757828	94.6493141818792	332.000702852383	852.292217779905
ATP6V1B2	49.6311641763896	374.303134158254	133.314091246575	575.921250740066	966.144823469222	153.192238649353	865.730962948874	901.32690500468
ATP6V1C1	289.391066413373	550.59820227325	148.74104806222	135.354197118431	582.925060996786	752.968240762129	841.29679412581	295.132360421121
ATP6V1C2	772.148985182866	390.004852088168	926.174830412492	954.111823113635	256.782726151869	505.017203744501	371.881154365838	462.844220222905
ATP6V1D	98.0527671054006	250.812462065369	30.495296465233	0.0588614493608475	913.992866873741	527.073428500444	611.984201939777	228.745481232181
ATP6V1E1	187.025854364038	335.110460408032	53.9864129386842	692.106732632965	726.934298407286	15.4969138093293	889.866093639284	693.94675665535
ATP6V1E2	139.523593941703	668.710991740227	473.382623400539	450.178428553045	942.382252775133	181.414128281176	848.008368164301	994.908845284954
ATP6V1F	15.8708924427629	954.009053530172	534.710324602202	71.7946947552264	120.908064069226	586.738368729129	415.843446739018	912.512461654842
ATP6V1G1	430.991797707975	12.7778316382319	125.175909604877	284.28407642059	363.666382851079	404.175563715398	497.958436841145	58.1479456741363
ATP6V1G2	541.425789473578	222.027568845078	871.610732981935	321.101501816884	648.126616375521	114.39770529978	316.221558023244	16.533698188141
ATP6V1G2-DDX39B	112.110670655966	890.373258385807	266.838968265802	334.133530268446	342.978774802759	539.882702752948	994.151680497453	507.905975915492
ATP6V1G3	177.919357083738	24.445059010759	661.76685411483	917.107277316973	38.8112980872393	51.5871739480644	219.697950640693	506.354425335303
ATP6V1H	11.4223642740399	585.741517599672	683.879963355139	232.018674025312	53.7787373177707	197.9950950481	958.312880247831	488.525977823883
ATP7A	250.747952610254	382.322706049308	881.824906216934	422.675980022177	478.80938462913	174.133165273815	543.328786501661	743.918184190989
ATP7B	617.408699356019	555.334215518087	902.947428869084	364.342685323209	303.818277548999	181.471389019862	331.55116182752	74.4819010142237
ATP8A1	710.713558131829	557.934775482863	299.48673537001	721.479751635343	652.738790493459	113.936088979244	667.07574040629	893.74045887962
ATP8A2	621.090532280505	132.686500903219	343.62837462686	74.4646734092385	714.086252264678	707.317156018689	659.287106711417	684.755628695711
ATP8B1	639.179913792759	263.654303504154	30.7165517006069	700.340558774769	474.736160365865	499.886416830122	443.932755850255	911.366532789543
ATP8B2	646.539406618103	475.279484409839	399.184743640944	123.984104022384	480.075400555506	619.269092101604	402.315466431901	133.52939253673
ATP8B3	967.64302928932	45.4164075199515	665.612031472847	822.921309154481	61.8389009032398	966.439603827894	5.77070098370314	279.129045782611
ATP8B4	769.194800872356	594.112136401236	33.420586027205	489.294519415125	579.434073762968	588.260819436982	601.827821228653	520.199143094942
ATP8B5P	450.879500014707	201.715083559975	459.974915487692	88.205685839057	944.404519163072	897.341594099998	959.961267886683	561.474019428715
ATP9A	14.2625903245062	379.715310642496	17.6386530511081	652.520332951099	820.816427934915	522.012301720679	646.82617620565	598.863028688356
ATP9B	240.917270304635	303.562275832519	572.07130570896	384.773195255548	423.245489597321	546.155528398231	587.190984049812	187.260967446491
ATPAF1	987.110616406426	671.595999505371	834.801236633211	358.829149277881	266.767529537901	44.2285954486579	687.006682856008	43.0781345348805
ATPAF2	336.39825321734	354.637054726481	944.018155802041	564.004386542365	11.5439386572689	886.513153556734	826.963092200458	405.399192823097
ATPIF1	904.11744848825	251.160267274827	639.496903168038	853.670947253704	248.894466087222	33.1762004643679	315.099224913865	182.094576535746
ATR	670.487279305235	778.842663625255	498.552925651893	265.775992302224	431.550339795649	443.154913140461	621.157465036958	812.330339569598
ATRAID	65.741678699851	541.167382150888	623.348707333207	294.029546901584	129.144746810198	842.598758405074	553.254036931321	13.3907420095056
ATRIP	765.2374249883	919.237207388505	624.86492889002	986.443515634164	582.924618385732	705.049631651491	521.207760786638	177.711369004101
ATRN	452.590747736394	127.028373768553	330.59598878026	291.9689679984	138.756447704509	401.77375706844	13.8447156641632	958.412954350933
ATRNL1	253.928729565814	486.097268061712	162.472251802683	12.2106960043311	265.913426876068	467.870904598385	12.1989019680768	763.80510115996
ATRX	743.130027549341	691.087497863919	653.328712563962	500.183034921065	684.696970507503	401.010767556727	100.958683528006	101.409607334062
ATXN1	947.909058304504	663.979532197118	674.083834281191	359.61535689421	319.174927659333	228.642795467749	87.5231514219195	117.970489664003
ATXN10	390.977107686922	47.1165755297989	624.190985923633	991.766143590212	417.831975035369	349.741087062284	854.964579688385	410.357609158382
ATXN1L	804.086242103949	278.83768780157	936.852884013206	212.333557428792	867.655399721116	648.885510861874	550.516745308414	127.253575716168
ATXN2	259.069724241272	791.574899107218	473.61782588996	184.772486099973	594.068784499541	296.106989262626	530.549445189536	975.179346743971
ATXN2L	987.935710465536	763.857072452083	479.086463106796	31.6488575190306	898.291018093005	318.191603757441	668.715938925743	101.993025047705
ATXN3	358.022798085585	211.498497519642	562.354045221582	512.865451863036	986.350645311177	678.613746771589	680.080395657569	549.443939002231
ATXN3L	556.145630311221	839.631194714457	948.089835001156	909.053682349622	567.633701954037	408.472864655778	943.577349651605	139.186392305419
ATXN7	556.818207725883	20.1702178455889	175.974777434021	48.204051097855	367.62512405403	217.303769430146	967.951586004347	390.56030777283
ATXN7L1	530.769380042329	405.699704773724	813.29384772107	395.281478296965	100.062130251899	352.866815403104	363.140961388126	433.418234577402
ATXN7L2	733.618036145344	12.5651678536087	454.058237373829	889.156682649627	477.881515631452	897.338607814163	646.689208922908	555.831760633737
ATXN7L3	165.1381556876	865.400718525052	633.873104583472	220.364392502233	527.5956641417	245.874288259074	686.06541864574	797.726965975016
ATXN7L3B	58.591133216396	334.02531221509	633.537995629013	766.423314576969	885.46727062203	776.365987723693	525.33075446263	383.316248422489
ATXN8OS	508.585196221247	610.911487136036	702.88987737149	794.360592728481	532.913781236857	228.54990651831	662.268817191944	36.6518665105104
AUH	197.683372767642	633.862707065418	674.761852016672	702.905863057822	243.590577272698	488.201232161373	991.291647776961	808.928666170686
AUNIP	541.53139423579	162.242668913677	648.899979656562	85.256326245144	468.069579917938	947.726088808849	428.213394712657	349.893998354673
AUP1	643.164505949244	425.809520296752	324.060718296096	777.113279793411	942.523328121752	779.477832140401	101.034023566172	138.92609695904
AURKA	909.087002277374	58.7991406209767	250.96531608142	688.206662656739	194.894062587991	183.008605847135	578.588016564026	312.004439532757
AURKAIP1	340.843449113891	873.702022014186	267.888536443934	43.8897283747792	392.873887671158	101.381245534867	954.794743796811	848.259902792051
AURKAPS1	866.939566563815	537.868307437748	480.175568722188	653.68183911778	763.029937166721	963.785512838513	457.946318201721	256.36998959817
AURKB	19.3257664795965	39.6038121543825	213.471544208005	54.5521632302552	538.501223782077	980.740299448371	184.415274998173	6.92098238505423
AURKC	698.072555009276	500.474070664495	831.202663015574	790.110499830917	647.765266476199	712.901511928067	147.02968718484	373.238459927961
AUTS2	452.451925259084	986.346377059817	948.769533308223	897.861058823764	104.678250150755	51.1203014757484	664.331531152129	989.816965768114
AVEN	715.635618194938	799.530984833837	877.088353270665	303.632390219718	105.293211759999	12.6916735898703	541.569662978873	890.068516833708
AVIL	227.882141480222	394.148090854287	357.194288866594	178.281514439732	547.204407164827	841.248308075592	975.079463561997	765.102985082194
AVL9	503.223894629627	346.425512107089	744.396164081991	837.468734243885	693.368709878996	745.50871597603	966.708187712356	433.14565019682
AVP	582.952383207157	734.54036237672	465.697029139847	368.734360439703	336.465601110831	710.356646217406	359.155158977956	338.585377670825
AVPI1	162.31981664896	38.8857750222087	353.019576054066	846.83396993205	594.330488238484	746.544350404292	541.315783979371	126.710921525955
AVPR1A	973.380255745724	128.767387708649	753.012978238985	653.56354531832	404.515784466639	506.787784863263	980.460662627593	83.9041606523097
AVPR1B	467.882396886125	529.867372242734	985.458099050447	903.784560970962	222.624707967043	139.700726838782	613.864717306569	67.8407922387123
AVPR2	33.5926201660186	800.615906948224	593.35417416878	599.530544830486	670.345432590693	758.686502929777	385.852449107915	502.037575934082
AWAT1	214.160727569833	467.928921338171	265.726875280961	796.404160559177	400.754591217265	348.961748648435	416.479313746095	200.269257649779
AWAT2	922.161700902507	147.720311535522	609.610200859606	358.296182472259	66.3364280480891	956.378791946918	937.559126876295	15.5247608199716
AXDND1	531.983376480639	966.434672474861	341.979327844456	990.640997886658	91.137956129387	940.564071526751	150.398614583537	473.989526042715
AXIN1	102.008450543508	798.683427274227	162.779215257615	451.94472791627	846.375146880746	889.05516709201	451.816349988803	445.225252071396
AXIN2	480.390508659184	944.638733752072	871.470347512513	240.240823477507	345.173907233402	699.041603365913	789.845612132922	382.723749382421
AXL	340.867387363687	412.422532681376	373.786583542824	200.479807797819	201.635667821392	699.867792893201	917.673738673329	793.254044372588
AZGP1	659.000182058662	9.26104630343616	289.136238861829	194.695714395493	571.529308799654	862.933054566383	516.849828651175	995.434189913794
AZGP1P1	414.36834493652	298.572114668787	459.39395413734	552.935409592465	154.16793175973	307.304659392685	469.144923845306	991.753610782325
AZI2	515.921712853014	70.9987529553473	83.7364876642823	388.693316373974	8.45747767016292	593.975032446906	404.712675139308	567.037992412224
AZIN1	7.56029621697962	398.720564786345	961.437181103975	936.560516012833	760.827343910933	307.024116395041	821.472016396001	595.20451282151
AZIN1-AS1	319.022332550958	509.461217327043	921.22522322461	252.193155465648	238.78937214613	534.617689670995	599.930833792314	238.687578588724
AZIN2	557.062310399488	348.654528614134	294.049488613382	392.998773837462	764.039967674762	957.30731356889	383.818922098726	330.250167055055
AZU1	705.355330603197	353.253610664979	698.167860507965	968.423432204872	86.2547371070832	967.727970099077	612.164790742099	834.158011712134
B2M	403.038499876857	129.234574269503	375.074832467362	241.234475746751	382.620007265359	404.935729922727	451.112703653052	503.368604695424
B3GALNT1	437.014274764806	476.617557695135	825.269023189321	895.845736609772	601.325193420053	185.925666242838	227.386458776891	705.17849875614
B3GALNT2	744.454426225275	357.363311573863	383.112960727885	230.381676694378	752.862818771973	980.177641147748	449.619279941544	150.127496337518
B3GALT1	111.760579748079	746.470651589334	544.589930446818	263.032775139436	564.483924768865	827.936667250469	722.190636675805	380.384310847148
B3GALT2	334.191107889637	921.741678612307	792.229783721268	325.69216680713	936.435410520062	201.587044168264	527.731390437111	409.97836063616
B3GALT4	76.7972317989916	153.223946457729	409.81666976586	214.187891688198	906.156125711277	344.196945661679	376.280816737562	506.062185391784
B3GALT5	323.13787471503	808.785040630028	823.627135949209	341.879656072706	69.9622388929129	492.534751538187	265.949763124809	213.555536465719
B3GALT5-AS1	782.958280295134	290.691063506529	413.148623192683	927.405859809369	396.448403131217	751.366742653772	274.706133408472	538.630982628092
B3GALT6	42.1058491338044	107.969588367268	239.685569191352	547.562971943989	651.084734359756	765.72371693328	698.28214077279	853.09890890494
B3GAT1	167.179205920547	580.270854523405	32.3858980555087	454.879976809025	170.418841065839	394.458265043795	701.143056387082	402.036485727876
B3GAT2	921.7351868283	884.269511327147	637.284639524296	356.580228311941	541.975607862696	224.031253485009	71.2838442996144	572.921395301819
B3GAT3	885.626932838932	134.834893979132	961.84007381089	710.944616701454	637.57017115131	207.664106972516	673.433706862852	157.028155401349
B3GLCT	758.825584314764	499.275319976732	441.962691722438	447.646070970222	374.016160145402	838.763754582033	859.630140475929	967.225267086178
B3GNT2	411.584254121408	749.128588242456	950.287977932021	646.202258067206	696.784547064453	491.424584761262	809.406620915979	918.585216160864
B3GNT3	120.253049070016	270.735685480759	394.933134783059	202.850381145254	533.410522621125	422.208085888997	960.395116126165	866.754765855148
B3GNT4	638.416997622699	906.558168819174	300.935306353495	518.923156429082	927.070762496442	960.799711989239	24.5930459350348	329.907630104572
B3GNT5	651.169401360676	909.612325252965	634.945793775842	131.308835465461	537.907596910372	43.4128837659955	890.011472161859	738.189142663032
B3GNT6	825.443049892783	928.454158362001	77.3894488811493	980.085629038513	630.0320958253	935.176040511578	365.196605911478	885.314168641344
B3GNT7	141.351591795683	112.227142322809	932.85309150815	235.935545759276	98.7215084023774	490.990287391469	638.467283686623	352.411420783028
B3GNT8	61.6269966121763	818.004827480763	620.669648516923	390.454967971891	969.424592563882	135.979292215779	717.058435315266	210.723076947033
B3GNT9	897.357495967299	574.131928151473	624.596745707095	401.471700286493	89.5225356798619	379.042580258101	794.403373729438	777.520971605554
B3GNTL1	941.196064231917	916.579737327993	347.913776058704	448.551964247599	527.91406144388	430.839473381639	98.5030615702271	326.998707838356
B4GALNT1	857.840796466917	752.940337173641	563.817595830187	415.723456069827	245.051444275305	303.917541634291	380.411805352196	218.704602215439
B4GALNT2	843.67738571018	774.008604465052	40.8953262958676	242.386240512133	44.5885190274566	562.280736863613	5.50851877778769	806.1738233082
B4GALNT3	261.792586185038	578.749292064458	677.824159851298	848.262479994446	43.5507649090141	779.660267755389	337.284265784547	953.497683163732
B4GALNT4	675.076815765351	543.361883377656	812.659006332979	181.543795857579	647.13849965483	801.986849866807	795.171596109867	135.228117695078
B4GALT1	280.928997555748	169.071368873119	426.988999824971	888.631409266964	162.855602102354	590.364794246852	998.957677278668	452.305746031925
B4GALT1-AS1	819.639535387978	561.598103027791	666.797935264185	382.301923586056	144.805357791483	678.37234120816	180.265580536798	14.1062915790826
B4GALT2	990.97295012325	433.097272645682	491.898519685492	721.98758716695	634.075806010514	55.767422541976	960.135618457571	390.982147306204
B4GALT3	249.438642291352	946.860756259412	538.466203492135	889.182724291459	695.440744049847	405.117823975161	479.449191130698	170.817385194823
B4GALT4	197.873974451795	189.040570519865	825.141707668081	883.970604743809	726.150911301374	585.999582428485	59.5279787667096	585.644834442064
B4GALT4-AS1	184.524052776396	258.816245710477	119.409477571025	756.528313271701	869.860157370567	665.794922504574	367.141113150865	827.297839336097
B4GALT5	297.326141735539	276.580144418404	648.50274194032	426.641214638948	501.635855063796	703.297331929207	32.6743298210204	727.648597676307
B4GALT6	158.673176541924	372.651820071042	291.470754658803	767.256413586438	276.65689215064	35.6715796515346	551.112366141751	834.309359546751
B4GALT7	468.528734520078	921.857381705195	657.235777704045	515.436289831996	288.900315295905	918.213332770392	116.692035924643	576.1711767409
B4GAT1	677.248986437917	298.814432462677	557.135449023917	438.29840561375	102.651732973754	106.121173594147	211.249594809487	261.644452344626
B9D1	106.664524413645	943.691424792632	836.994640761986	689.886664738879	204.622185323387	894.448032835498	785.581031115726	153.473657323048
B9D2	45.3766630962491	896.025724941865	217.860706150532	117.827410344034	956.358935451135	394.728843355551	148.073519347236	853.518654126674
BAALC	577.035085298121	777.694466756657	572.499993257225	886.002160608768	441.683293087408	11.483303271234	298.752278788015	237.790954764932
BAALC-AS1	188.148305052891	437.515652738512	509.034861810505	872.315999818966	617.631264496595	350.585532840341	110.729935346171	975.291161797941
BAALC-AS2	621.5675547719	721.627748571336	404.95301457122	112.62874561362	106.907145353034	683.120612520725	565.203631296754	101.79229802452
BAAT	968.161870958284	567.459946265444	283.920099725947	287.222638726234	609.690649900585	936.515036970377	399.091704981402	72.7540231309831
BABAM1	863.682921044528	616.268042009324	810.6250599958	926.419188966975	628.10992822051	70.0567804742604	414.781030500308	590.790119953454
BACE1	852.659599855542	958.684399491176	232.764161424711	165.975474286824	505.34489704296	294.982597930357	821.878307498991	647.120560519397
BACE1-AS	151.021869620308	818.33944702521	903.521459549665	990.272645605728	620.246154023334	193.098143674433	77.5410933420062	170.538666425273
BACE2	541.847878834233	841.426060535014	874.231739202514	127.088215667754	761.662762379274	203.394225798547	792.033567093313	407.997611211613
BACH1	692.665349459276	692.243122495711	107.512364862487	523.302512709051	669.370678020641	515.056370059028	392.516019754112	161.901753395796
BACH1-IT2	256.19994988665	916.775677818805	473.101180279627	155.248475261033	732.954369625077	692.180356243625	824.890014017001	863.771307747811
BACH2	121.110685868189	143.527860287577	469.398609129712	297.479535453022	656.179719837382	325.749065261334	907.197800232098	329.11675889045
BAD	831.965709570795	259.476229315624	935.858421493322	538.806635420769	356.023245956749	369.736528256908	207.895010244101	37.8652436193079
BAG1	784.373731352389	6.75042276270688	966.950775822625	597.583092283458	79.2606056202203	27.1226414479315	226.039737928659	23.5534019302577
BAG2	336.928946664557	584.737420547754	140.282617183402	807.954379357398	97.1894315443933	959.006196120754	160.327091580257	318.049703957513
BAG3	316.812215140089	9.14452690631151	26.4776507392526	204.181092791259	49.608564702794	349.352122051641	730.651841498911	91.1111563909799
BAG4	723.406500415877	702.540938509628	491.689446847886	113.938362337649	886.98222534731	584.214207250625	766.250178683549	395.979237742722
BAG5	31.2772744800895	307.48996604234	496.715935878456	704.288441920653	585.004907334223	413.962211692706	524.851677706465	937.695426866412
BAG6	514.12865309976	887.078979983926	576.684190426022	784.081796184182	983.620743034407	833.85136234574	896.826025564224	418.501473497599
BAGE	878.846769919619	622.086023679003	263.026951346546	869.414791231975	964.642950799316	489.65164157562	452.246719272807	154.427767731249
BAGE3	568.773559760302	848.590434296057	398.460788885131	656.482071150094	266.771527007222	937.007840489969	515.551205025986	272.052165819332
BAGE4	537.116352235898	815.068597905338	334.219011245295	480.510964989662	150.760093471035	750.990346074104	375.360343139619	737.704428378493
BAGE5	626.070885220543	375.988629646599	375.085947336629	631.734358845279	849.974223645404	959.316639928147	710.005432367325	932.461044518277
BAHCC1	255.332665517926	320.58001216501	174.704835982993	38.8605662155896	847.840283997357	353.308512596413	286.077303346246	501.243544276804
BAHD1	220.321549335495	694.009219063446	792.39984578453	536.998539464548	370.991388801485	697.888558031991	561.534222681075	469.420152949169
BAIAP2	863.228879636154	232.338199857622	19.8302229400724	782.12682553567	105.9567600023	728.315723594278	876.200593076646	518.3850529138
BAIAP2-AS1	530.481978552416	994.865347398445	572.580572916195	432.910234900191	728.815672453493	632.470895769075	341.492174426094	578.099551377818
BAIAP2L1	33.3042561542243	480.350298574194	640.010070521384	803.702555131167	241.437207208946	610.291203018278	661.880343453959	638.905475614592
BAIAP2L2	829.120133304968	937.422861112282	985.702914884314	130.588800646365	395.563786616549	582.870067330077	390.288055175915	188.17373435013
BAIAP3	98.6599114257842	449.806907679886	766.269308980554	31.5242111682892	411.91167361103	438.66056133993	392.734704306349	760.082609020174
BAK1	840.097724227235	183.969012461603	550.400068750605	623.307977570221	715.990585274994	465.472260024399	597.044282825664	360.154394293204
BAMBI	468.602405628189	466.72825422138	115.091697778553	926.127413520589	804.306962760165	235.800729133189	699.932409683242	666.08317871578
BANCR	406.945964554325	815.722754923627	668.606899911538	609.095241408795	449.071919312701	799.605728127062	700.119144748896	719.439456937835
BANF1	213.324496755376	167.86146000959	9.36270947568119	193.323810119182	179.083678405732	777.123143896461	92.7708726376295	405.444260919467
BANF2	560.888331150636	869.852964999154	685.275383293629	917.945313965902	120.080684078857	652.606416260824	50.6831300444901	247.688400559127
BANK1	857.227657688782	104.450197191909	64.8462118115276	119.318204466254	742.545986548066	380.251042312011	494.405999546871	261.332082329318
BANP	561.664019012824	869.398924289271	608.369509456679	881.662870990112	484.118301887065	540.787314297631	295.206480659544	298.455524956807
BAP1	366.273494670168	879.649879876524	204.595181392506	250.434647779912	830.627653980628	529.718225589022	464.207189623266	126.689633820206
BARD1	289.799088845029	56.8746565841138	903.445904608816	206.911000190303	249.312401982024	810.433072503656	878.204833483323	58.184175984934
BARHL1	910.027946578339	844.162868335843	489.315120968968	72.319018188864	654.120832448825	762.546113925055	735.085596563295	494.21373102814
BARHL2	829.832829069346	837.459838716313	919.224879704416	47.9376479052007	106.669281842187	236.013664864004	402.161638718098	424.75380259566
BARX1	628.608728758991	854.930693982169	881.69918442145	136.257370468229	422.891521826386	172.617463860661	400.538146030158	542.344321263954
BARX2	641.715040663257	2.87340534850955	547.300942940637	849.915773142129	991.863953880966	832.433734089136	688.796172384173	494.81340078637
BASP1	321.290636667982	998.356615193188	211.72533207573	496.558382408693	352.659922791645	185.289726126939	759.926584316418	983.003878965974
BASP1P1	600.042873760685	958.363549318165	808.120236732066	306.702356087044	659.967823885381	150.265759089962	410.313365748152	124.273253139108
BATF	544.150206726044	96.2712543550879	433.970259735361	316.220548702404	355.958481086418	184.549020137638	89.3846722319722	695.128936786205
BATF2	848.164949566126	348.446751944721	15.1392170228064	324.900789186358	233.160207979381	912.548897555098	63.176576513797	42.0493653509766
BATF3	657.356052892283	806.89519783482	396.331960568205	771.049986593425	31.0848550871015	243.020609719679	567.485686624423	142.073744209483
BAX	57.472100481391	620.513714151457	319.622653070837	56.6824583802372	284.265740541741	625.020438572392	554.574612760916	134.788966970518
BAZ1A	907.641912810504	683.758592233062	792.577846907079	738.295163260773	533.546101069078	422.794254962355	632.471942575648	253.92135605216
BAZ1B	19.6154494769871	730.078370776027	507.721932139248	281.856777379289	142.96980923973	413.191572297364	905.942780897021	121.168550336733
BAZ2A	870.506559731439	498.528224183246	410.697960760444	791.470929514617	753.715019440278	808.282122481614	861.938623478636	262.742723803967
BAZ2B	841.844668611884	374.888360733166	63.0902403499931	906.822912627831	955.636946717277	35.6335821561515	847.899445565417	249.470298644155
BBC3	476.208432810381	714.033927069977	582.284740172327	48.8487854599953	884.792544879019	208.161689108238	198.405495611951	753.482734085992
BBIP1	775.842974195257	102.71242656745	153.147442732006	656.545687932521	815.740237478167	470.032127806917	44.7482902090997	604.496765881777
BBOX1	728.292646585032	858.14100317657	31.0924586374313	173.715249169618	429.689413867891	619.297463214025	713.604378979653	306.512312730774
BBOX1-AS1	856.081396341324	69.7859416250139	718.654628377408	790.34623852931	686.483596451581	57.710787281394	974.836234934628	154.185968916863
BBS1	90.7513669226319	281.494338065386	260.277864988893	523.795871529728	759.765357011929	634.549751877785	547.481898218393	489.43527135998
BBS10	559.959823032841	638.594440417364	16.1376777105033	972.257137997076	359.250238165259	416.107383323833	186.631359159946	22.7843755856156
BBS12	75.3384274430573	179.69411984086	199.549155309796	260.683916276321	892.021885840222	235.853501828387	679.206606000662	64.823413733393
BBS2	248.660994926468	26.2229116633534	344.153253128752	666.116596199572	421.090815914795	894.127176841721	940.736588090658	605.682070599869
BBS4	691.167139215395	51.7221665941179	423.758346354589	907.853978686035	645.460056141019	370.115211931989	452.664684969932	332.526994869113
BBS5	109.170275041834	121.169575024396	440.751252928749	184.821049682796	68.0106305517256	191.812375327572	204.801742685959	827.123512513936
BBS7	439.510019263253	746.32072634995	21.3162731379271	441.157131223008	787.960146088153	347.537881694734	812.063471181318	868.923994945362
BBS9	759.4963691663	802.638504188508	865.216560196131	145.551092689857	756.831055507064	670.02423829399	655.117208370939	313.078604405746
BBX	170.515846693888	992.849519010633	316.56649382785	24.6393391862512	881.236091023311	300.851400243118	329.573977738619	250.848799478263
BCAM	221.57436888665	712.60253735818	70.1030348427594	431.516586337239	428.216540021822	318.093423498794	801.770189311355	710.169603349641
BCAN	450.144104193896	221.71170823276	414.216898847371	693.973895162344	820.537455147132	924.954697489738	235.945372842252	265.342745231465
BCAP29	697.23908812739	629.358712816611	174.949730513617	901.358202798292	476.183800492436	411.548737203702	911.798614775762	737.475187284872
BCAP31	347.602690104395	843.020849628374	322.446475969627	165.109528461471	463.278823066503	591.524187242612	419.675779296085	409.1067223344
BCAR1	78.0359499622136	817.624340998009	289.847486652434	762.237650807947	962.317496770993	889.776963973418	419.781205011532	360.727257560939
BCAR3	426.390748238191	816.461782902479	105.093580204993	499.504211358726	711.701545398682	133.093157783151	0.379419885575771	333.070281427354
BCAR4	369.67402510345	532.712744316086	81.0080873779953	629.552165977657	955.606384202838	427.597735309973	365.854735951871	203.599283238873
BCAS1	470.941226230934	554.597177775577	846.633594715968	891.141799744219	131.543953670189	918.757951585576	376.90257281065	553.043187828735
BCAS2	184.16739301756	236.95282638073	283.582058968022	522.744475165382	581.679890630767	735.268802149221	83.2440562080592	713.073283666745
BCAS3	625.702060060576	699.288669042289	864.917964441702	933.444685302675	622.034706175327	437.681108945981	693.579313112423	744.188737124205
BCAS4	36.1391329206526	918.192958459258	387.580037349835	686.14350259304	873.927880544215	881.561842747033	729.919706704095	696.006803773344
BCAT1	906.00758860819	610.387799097225	98.8089451566339	256.055907579139	591.220945352688	59.9633846431971	312.124024610966	834.26019619219
BCAT2	640.026333276182	591.646705986932	978.465239051729	484.537992160767	403.220600681379	939.833379350603	460.10358328931	377.333708573133
BCCIP	760.867100674659	802.511219168082	680.338042322546	489.191093714908	676.195830805227	425.965970149264	483.918320154771	244.513408048078
BCDIN3D	552.69921803847	851.118007674813	129.781848751009	363.488377770409	802.434921497479	10.9862573444843	511.463119648397	295.940637588501
BCDIN3D-AS1	415.629357332364	13.1815585773438	615.909670712426	174.063473707065	488.879425451159	956.781059270725	51.6687431372702	343.743566656485
BCHE	481.710525695235	122.738644015044	390.58085065335	791.275874944404	933.161129942164	93.7454719096422	949.149110587314	425.373227801174
BCKDHA	632.113059284166	544.013783335686	100.663188379258	389.737767865881	249.031085055321	698.520261095837	652.642367174849	668.940421426669
BCKDHB	906.502489931881	979.515512939543	528.542421292514	966.002877103165	974.526677513495	590.405996656045	377.223171992227	562.667895341292
BCKDK	1.65360257960856	92.5676946062595	224.551104940474	50.0942999497056	490.943706594408	134.499749634415	197.494992753491	823.207736713812
BCL10	850.325264036655	493.866161908954	309.465032769367	209.709926974028	121.194184059277	958.59054941684	349.488229723647	530.635114992037
BCL11A	833.672231063247	188.616312574595	841.30110242404	981.001705629751	204.528008820489	89.1027981415391	153.463827446103	443.764452124014
BCL11B	246.433747932315	678.165195975453	553.138843271881	99.7220347635448	561.859558103606	549.160970840603	516.775384545326	71.5783329214901
BCL2	180.836729938164	75.3236156888306	950.311241904274	146.545433206484	374.395996332169	737.102557206526	244.266385445371	479.812068864703
BCL2A1	836.023369571194	958.944469690323	166.220872430131	586.652861908078	368.649796117097	984.9205724895	7.6449760235846	234.250099398196
BCL2L1	108.435187023133	548.145456472412	329.994446597993	612.066541332752	112.3898900114	244.240772444755	120.920455083251	786.16489446722
BCL2L10	136.134615167975	171.804598765448	23.7806716468185	768.635635031387	652.537924004719	814.106952631846	916.355811292306	127.473499625921
BCL2L11	405.667075654492	232.205127133057	633.969591697678	717.563763959333	552.755238721147	979.729966726154	213.280133437365	368.822751333937
BCL2L12	4.30043577216566	114.204223034903	450.512720737606	820.270494325086	410.908406367525	419.669626979157	553.327725967392	172.709411475807
BCL2L13	644.585211295635	812.849422683939	168.435839703307	852.339809527621	287.569186417386	757.320418721065	309.790431056172	81.9148130249232
BCL2L14	575.591809814796	443.332132184878	537.676817504689	71.7282746918499	200.628632912412	333.621782017872	770.419572945684	744.925335748121
BCL2L15	581.441055983305	767.379478085786	333.733700215816	140.787195647135	62.8932667896152	547.735291766003	604.230188997462	378.618789836764
BCL2L2	601.730827242136	933.969165431336	518.812292022631	773.546108510345	80.6757190730423	111.559594748542	281.868526479229	947.699133539572
BCL2L2-PABPN1	81.4769458957016	622.285723919049	197.293267352507	632.193750003353	970.497897127643	861.336732748896	686.568088363856	517.806838965043
BCL3	654.790395637974	594.625802710652	716.203275602311	175.191472750157	612.910701194778	352.228541625664	276.916769100353	804.13273232989
BCL6	906.839405652136	310.626877471805	176.038704346865	208.393423585221	518.414259655401	401.228099130094	357.536603929475	313.729830086231
BCL6B	487.607684917748	110.25325814262	538.26919128187	339.974084636196	93.6964291613549	107.053858693689	794.628544710577	356.748402584344
BCL7A	559.662439627573	186.255352571607	563.335158163682	241.187432315201	469.3780222442	106.70402715914	455.723494291306	449.391361791641
BCL7B	313.836114481091	900.080695282668	937.817277619615	986.891207518056	239.403002662584	969.626386184245	724.683837965131	917.836836073548
BCL7C	745.321198599413	336.279213894159	575.345101533458	619.945414597169	204.615160822868	635.170119814575	776.287477463484	151.1432423722
BCL9	191.160097252578	565.322597278282	983.905137749389	765.947617357597	275.126647436991	359.947029268369	988.159023690969	634.149087592959
BCL9L	880.810003262013	242.19512892887	102.332930080593	610.946390777826	644.428752129897	99.7297456488013	467.738734558225	226.499503711239
BCLAF1	784.937545889989	65.3866280335933	436.625495320186	707.338959677145	298.255041707307	23.2366181444377	518.014546716586	39.1480841208249
BCO1	646.770619321615	870.385548332706	581.054105889052	777.669437695295	468.275499995798	386.739844689146	833.28412217088	342.267484171316
BCO2	752.688986482099	393.14598031342	304.80235000141	803.43167250976	947.609452996403	494.237306294963	854.198902146891	27.7659322600812
BCOR	68.9690273720771	155.759454937652	701.634841272607	95.7369834650308	830.716840224341	530.063757207245	95.020136795938	271.869988646358
BCORL1	728.993520140648	294.5892366115	628.613480133936	47.0433020964265	886.370203457773	750.170635525137	723.624239675701	878.685355652124
BCORP1	283.882577437907	460.694016655907	511.515994556248	142.47523015365	152.892287354916	35.3218521922827	374.76024706848	458.803105400875
BCR	129.369449568912	941.756090614945	660.850193584338	388.994346139953	402.107421774417	712.807162664831	640.401987358928	928.934259340167
BCRP2	182.281804736704	615.528614027426	899.760611355305	649.775866651908	670.914276968688	937.097750138491	747.612366219983	202.233116375282
BCRP3	291.671015322208	638.550826814026	175.561032723635	138.032004237175	330.051482887939	868.404912529513	661.717536626384	636.571309994906
BCS1L	539.511783979833	668.300989083946	274.194229859859	237.424949416891	235.467268852517	349.106681067497	135.405955370516	644.980782875791
BCYRN1	798.531863838434	873.292011907324	634.805096779019	889.682901091874	217.66219381243	138.853763462976	395.291284658015	323.674862040207
BDH1	634.480855427682	765.043763443828	496.460752561688	664.052159059793	932.198347058147	858.424767153338	352.981423027813	269.590118899941
BDH2	110.962421866134	568.403269862756	151.15550160408	588.283506222069	295.334831345826	671.332214493304	183.931409846991	899.373690364882
BDKRB1	283.916180254892	654.732021037489	584.353916114196	30.0337539520115	465.673759113997	753.420958062634	116.380452411249	938.713122392073
BDKRB2	765.215994091704	62.6385463401675	977.966829901561	78.1281525269151	647.718793479726	839.347928296775	979.555282276124	286.188904428855
BDNF	167.400107951835	234.079857356846	257.42975063622	216.726732207462	538.323029410094	202.798786340281	289.125645766035	571.561274351552
BDNF-AS	79.1571526788175	441.460111178458	570.89954521507	894.468955229968	838.099683867767	314.980217022821	961.529725696892	210.520539432764
BDP1	593.451992841437	565.17152255401	388.022010913119	685.968011850491	294.614761602134	80.2474860101938	448.171913390979	832.892824197188
BEAN1	210.414584726095	390.278712380677	798.087490955368	164.317487506196	632.043050834909	834.198786411434	589.144526747987	159.740538103506
BEAN1-AS1	928.6474280525	718.100319150835	850.579626858234	56.7219362128526	815.867853118107	794.575364328921	474.478219402954	69.6252400521189
BECN1	21.4130734093487	693.045352119952	268.070109654218	342.82296220772	382.135200779885	399.574289331213	507.621068041772	7.7294297516346
BECN2	380.624186946079	593.563688220456	622.2452390939	983.070290647447	518.851424334571	21.8093525618315	59.7539006266743	334.671565098688
BEGAIN	869.014178402722	140.669350279495	85.1916635874659	978.641232009977	951.57356117852	469.083643751219	893.54704413563	470.487211598083
BEND2	145.885656122118	60.6488860212266	414.11692975089	871.915156021714	67.7375663071871	962.842406472191	137.948674382642	554.669318255037
BEND3	911.689825588837	671.031704172492	773.951806593686	427.140066865832	258.808181388304	415.05802073516	395.264318445697	280.286526773125
BEND3P3	78.5500274505466	113.137222826481	286.27041215077	705.141179030761	113.684255629778	914.707166841254	306.064693257213	881.071674870327
BEND4	700.727289309725	141.41435152851	914.550981018692	920.14434048906	78.2432912383229	117.699088528752	413.95009146072	92.298359144479
BEND5	127.464285353199	781.89267590642	593.734646216035	640.948368003592	893.256445880979	93.7274931930006	417.628612136468	831.820896361023
BEND6	28.9643523283303	377.571284538135	266.859313240275	215.968017000705	194.237012416124	588.487788103521	799.300817772746	429.664890049025
BEND7	336.979551706463	473.794923396781	914.482951629907	445.505978772417	722.487800754607	38.9592777937651	338.793570175767	402.718547731638
BEST1	968.377038370818	1.60900852642953	278.186789946631	929.358639987186	930.572033626959	808.181322645396	775.92049096711	295.065862359479
BEST2	588.699832325801	696.020989445969	938.807890517637	525.899896863848	946.052721468732	588.236081879586	36.8107638787478	421.541947172955
BEST3	628.947831923142	827.332583954558	474.084673216566	617.953458335251	144.095750525594	71.1401076987386	270.343628711998	134.976414963603
BEST4	95.1125524006784	741.407946450636	472.284321207553	696.02583674714	720.082658110186	219.01563857682	947.055061114952	627.283921232447
BET1	854.475340573117	68.5585022438318	463.801517151296	70.3469018917531	145.198383601382	507.266909815371	373.541437555104	255.260409321636
BET1L	171.250858809799	138.537080259994	519.963418366387	468.094381969422	985.774698667228	96.3001435156912	856.907528825104	304.44993940182
BEX1	102.796397870407	626.793891889974	124.172807205468	510.807718150318	694.494768278673	745.374933118001	286.090709734708	947.625774424523
BEX2	480.425463756546	661.914636613801	430.196556961164	740.197575418279	956.100356765091	353.966274298728	339.358715340495	88.5464393068105
BEX4	328.580872388557	247.476252261549	564.098870614544	742.68716503866	897.255146177486	217.24520297721	367.745161987841	122.669849777594
BEX5	328.193106222898	711.647675605491	181.682089809328	173.029626486823	848.895031493157	914.94526900351	230.394185520709	579.017136478797
BFAR	690.804393030703	438.289354555309	881.888285744935	198.433303274214	230.678156018257	505.930911051109	181.65088375099	31.2209229450673
BFSP1	418.397641740739	358.669887064025	455.266691278666	900.829723570496	793.519595637918	465.562910307199	983.012668788433	576.77065487951
BFSP2	682.026008609682	2.84986733458936	983.538097003475	855.784817133099	853.471740847453	674.529215786606	421.062184032053	654.072456294671
BGLAP	382.303392514586	29.5831137336791	686.732618603855	181.590883526951	6.62987446412444	923.128804890439	737.153450259939	620.329977013171
BGLT3	23.6459686420858	31.1783403158188	830.784100340679	281.937855295837	266.201259102672	377.377428347245	236.164602916688	39.603230310604
BGN	979.671255452558	296.751214424148	255.501219071448	569.044997915626	609.174129087478	387.290389277041	666.400300571695	323.249627603218
BHLHA15	776.031273417175	612.850577337667	848.01873145625	499.832675093785	346.499957377091	903.953939909115	380.842732032761	266.541276359931
BHLHA9	940.499245887622	264.43042466417	492.253107950091	695.368961896747	971.977474633604	672.352079069242	202.347706537694	272.846553707495
BHLHB9	658.422464970499	732.079399516806	220.710045890883	269.053961616009	473.54665864259	880.426979158074	628.744103712961	887.897041393444
BHLHE22	163.133845664561	516.318217618391	259.796840371564	47.8501562029123	413.833663798869	861.830149311572	17.7303268574178	16.8319207150489
BHLHE23	554.861297598109	928.60534065403	975.488119293004	973.670393694192	265.573535114527	573.215976124629	35.8380808029324	391.022368567064
BHLHE40	700.385152595118	430.002101697028	620.039998320863	478.628882672638	259.455619612709	924.936813302338	45.4481865745038	188.851810293272
BHLHE40-AS1	585.637214593589	983.131231507286	748.010475654155	595.358569407836	688.758742064238	88.3995094336569	202.919285278767	837.270787684247
BHLHE41	720.32330930233	330.878474749625	7.144785951823	861.616126028821	173.918262589723	854.025454958901	705.592460231856	244.233490433544
BHMG1	813.09906905517	783.193516777828	314.972747117281	245.473202317953	681.027516722679	482.055689906701	933.3203996066	735.085358144715
BHMT	5.75196137651801	363.441687542945	331.415979657322	525.204731617123	542.455667397007	269.619000609964	864.022652385756	582.137717632577
BHMT2	267.473794752732	976.894654333591	836.346407653764	308.445058530197	475.238663842902	483.756100293249	644.372335867956	622.995277633891
BICC1	840.747188776731	882.242692867294	36.6525747813284	734.588790219277	216.955689480528	175.776175456122	387.909101787955	489.319821354002
BICD1	258.368834387511	606.398659059778	105.444791959599	633.43519042246	679.294422501698	200.10955655016	630.241327453405	537.07044175826
BICD2	584.208026062697	985.931553645059	114.772871136665	404.053181875497	787.6876082737	132.639282150194	100.219818996266	948.33368062973
BID	989.12570788525	822.179241105914	724.386542337015	858.223527204245	301.090476103127	448.381311027333	399.913525907323	361.062290612608
BIK	900.934462668374	406.939845066518	487.328868592158	925.102036213502	912.486171117052	861.373684601858	735.883664339781	611.104457639158
BIN1	485.849636606872	420.872926013544	834.239718271419	719.570215558633	986.2848543562	442.315788939595	533.557295799255	369.586593238637
BIN2	605.941376881674	165.953712537885	548.045149771497	191.154949134216	583.134921500459	40.6280499882996	202.538487967104	529.423639643937
BIN3	765.327451983467	460.86193039082	145.827381173149	582.536230562255	559.21764485538	514.224234037101	416.644893819466	192.220244556665
BIN3-IT1	465.66304191947	470.375946490094	157.174596562982	881.079693324864	421.011491212994	645.213030278683	37.7810692880303	108.683204511181
BIRC2	840.224239043891	289.871620247141	912.172245327383	976.144512183964	724.95665634051	548.420055536553	985.627216054127	309.146995889023
BIRC3	460.947840241715	172.031336463988	464.201460359618	266.2478745915	902.059105224907	676.096095703542	703.632069984451	749.111654004082
BIRC5	728.079499676824	62.3591081239283	814.752689795569	612.240751739591	616.181086050346	983.032280113548	302.477868506685	224.756758660078
BIRC6	925.855393288657	110.544673865661	503.605060977861	671.572028193623	476.825570454821	469.919014023617	470.337557373568	678.706661565229
BIRC6-AS2	474.039496853948	56.7296198569238	704.022486926988	697.297061095014	398.92908744514	448.869766201824	561.633319826797	466.4194250945
BIRC7	695.598534308374	22.0060755964369	828.611450502649	892.300800187513	858.264927985147	113.49098640494	339.215477695689	638.402305077761
BIRC8	571.307452628389	701.872427482158	346.762835048139	564.22749068588	511.266771238297	290.982784703374	848.677444737405	549.463688861579
BISPR	907.422987511382	638.860246166587	106.109261512756	147.146516246721	559.287726413459	483.501070411876	883.797574788332	974.04031874612
BIVM	288.223337847739	86.828178493306	102.129237027839	871.321252081543	720.40424332954	526.947215665132	374.565319623798	459.400270367041
BIVM-ERCC5	498.362059704959	863.684975309297	422.876292141154	87.5652390532196	839.12738552317	481.129418360069	992.761703906581	300.718954298645
BLACAT1	303.05262003094	976.673362310976	461.725938366726	710.690072039142	462.44083950296	300.941336667165	165.63580930233	397.202318767086
BLACE	757.474195212126	932.712303940207	666.534750489518	864.048755262047	156.850834144279	413.858238374814	468.372834380716	667.242320487276
BLCAP	488.669332349673	794.574920786545	965.147400274873	115.418079774827	841.687115374953	523.817795794457	161.6579471156	650.585297029465
BLID	600.969861261547	354.192601284012	264.240865828469	867.889986373484	713.349945144728	139.904146082699	379.85836644657	799.410070292652
BLK	237.04068060033	57.492000516504	843.347637914121	853.626566007733	970.305962022394	131.825057789683	631.103617139161	660.018484806642
BLM	307.730270316824	239.437572658062	501.536961412057	275.083243381232	45.7023275084794	949.455055873841	340.663880342618	442.002595867962
BLMH	527.990990784019	495.578897185624	669.772358844057	6.05858629569411	859.230726258829	75.5168125033379	345.383833162487	719.045493751764
BLNK	480.242437217385	873.328640358523	806.083268253133	329.838162753731	712.311739800498	509.625906590372	70.5112791620195	276.380223222077
BLOC1S1	142.859892221168	680.129930377007	874.683757312596	29.8231977503747	548.916941042989	103.201283374801	778.403573436663	366.342739434913
BLOC1S1-RDH5	322.940287180245	426.668647676706	298.616830259562	101.511617656797	843.249016674235	762.844156008214	714.228841476142	607.087357202545
BLOC1S2	55.672001093626	867.786347400397	744.926429586485	425.479419063777	45.1813654508442	876.921084476635	675.629209727049	377.644504187629
BLOC1S3	806.824252009392	557.477627880871	796.268758596852	404.593972722068	262.55969540216	72.5805168040097	569.086442235857	520.789070753381
BLOC1S4	540.442171273753	50.4727251827717	227.363923331723	919.676766265184	497.188189299777	70.0917190406471	308.598785661161	257.528044749051
BLOC1S5	838.136705802754	309.01553016156	126.892551546916	328.458787640557	206.821541301906	993.883502436802	420.167897362262	467.676405096427
BLOC1S5-TXNDC5	886.573389172554	7.57281901314855	91.3825493771583	646.97831030935	356.900999555364	949.447454884648	871.213397942483	98.7685788422823
BLOC1S6	694.867051206529	426.33674480021	623.968641040847	76.3271013274789	204.15921555832	105.497844982892	154.140461236238	763.417480047792
BLVRA	859.546718420461	632.973110070452	829.389041289687	506.625524489209	909.604444168508	991.345414659008	987.261763773859	144.982362398878
BLVRB	552.254213253036	79.9797363579273	623.122647870332	342.772061703727	983.031606534496	763.738864567131	87.2872939798981	712.326444452628
BLZF1	160.989234689623	716.365596745163	925.489029148594	271.644547348842	266.314461594447	414.762386819348	521.950408583507	384.612165857106
BMF	416.726102354005	265.931135741994	641.119494801387	846.60639683716	860.630418406799	152.447783853859	391.137606231496	512.710517039523
BMI1	263.551706448197	953.811584739015	603.65568776615	701.800583396107	39.8088567890227	786.405463004485	910.904629388824	980.743301799521
BMP1	481.29946179688	729.855412384495	239.049529191107	574.159796815366	16.8341747485101	15.32739168033	959.122612606734	573.132485151291
BMP10	659.987580031157	375.291749602184	61.1097617074847	807.748863473535	795.116846682504	469.868801068515	584.160864818841	393.784670392051
BMP15	641.198637662455	827.614474343136	948.496545897797	280.127546284348	564.03934629634	294.887560419738	277.076678583398	77.6168778538704
BMP2	145.578595343977	987.010952318087	663.330720504746	697.2397249192	651.348987827078	128.628537757322	306.612864835188	63.4742211550474
BMP2K	847.859369125217	615.615103626624	159.461251925677	936.916776699945	213.388829492033	609.299279982224	744.964929763228	286.079023964703
BMP3	360.262184869498	480.394045589492	950.242095161229	38.4471535217017	580.466517712921	334.710170747712	845.061057712883	676.359837409109
BMP4	948.578474111855	298.753726063296	96.5339154936373	177.133561810479	200.438260566443	283.784148283303	607.618672540411	49.5491558685899
BMP5	538.582747802138	480.419386643916	947.207725374028	997.478107921779	147.251833463088	321.659496519715	129.133034264669	707.764961291105
BMP6	486.547719920054	29.8851754050702	132.869010092691	232.365363510326	716.718014096841	928.362668724731	224.530457984656	669.631553813815
BMP7	664.057143498212	836.714045610279	815.996155608445	925.593911670148	977.3767022416	557.280601002276	971.434546401724	397.917905123904
BMP7-AS1	879.679685691372	675.186898093671	207.711869385093	877.326569752768	192.379687679932	419.598184758797	111.257177544758	701.342963147908
BMP8A	534.84953311272	461.344441398978	375.474588247016	956.429213518277	884.592891437933	729.408615035936	932.946705957875	972.13751799427
BMP8B	641.266433754936	150.238213595003	234.029742889106	89.1101157758385	458.031182643026	236.093193525448	728.988441405818	448.950129793957
BMPER	236.956857377663	648.612165590748	818.493716884404	798.706284258515	946.032663807273	514.158562058583	357.643424998969	56.5849901176989
BMPR1A	969.036550726742	458.678296767175	531.09694737941	277.454632101581	69.4554143119603	934.287902666256	400.160992750898	133.831058861688
BMPR1B	496.833546087146	843.394815223292	945.037746569142	754.60585183464	103.494431590661	616.822850890458	704.958920599893	435.859042452648
BMPR1B-AS1	301.993774715811	202.857401687652	650.73603647761	953.078988473862	458.623243262991	28.1046126037836	372.277632122859	246.034511132166
BMPR2	708.623373648152	807.044444605708	418.389681028202	352.684915997088	331.695967586711	911.632805829868	557.938654674217	503.207635134459
BMS1	491.948829498142	282.69955329597	242.871749680489	76.4373557176441	941.927175968885	818.035177187994	850.583597784862	401.655216701329
BMS1P17	104.113193228841	164.997114799917	4.55023837275803	703.300150111318	831.297554075718	70.4878973774612	734.216140350327	584.407690679654
BMS1P18	104.282065294683	539.852145360783	921.714241616428	929.056024411693	935.896125854924	227.571384282783	798.744162777439	837.058583740145
BMS1P20	999.857209157199	821.804677601904	622.630786616355	303.010700736195	353.025597287342	980.729821370915	686.143883271143	560.441019944847
BMS1P21	277.733256109059	838.386349845678	422.866439446807	646.492587402463	301.311881048605	839.23187921755	471.612753812224	687.626979313791
BMS1P4	387.494242517278	500.783020630479	369.36642578803	776.874189265072	538.147871149704	711.083817528561	106.135709676892	702.728426316753
BMS1P5	717.880016192794	429.357358952984	39.4833136815578	631.437546340749	897.963549941778	410.676943138242	463.020091177896	208.680712617934
BMS1P6	319.337190128863	439.308014465496	103.788104373962	815.024857176468	768.562766723335	216.396510601044	737.104437313974	128.734838915989
BMX	672.189944190904	429.31648530066	641.766318120062	291.61292174831	397.112944629043	445.538040949032	306.862926576287	698.673154693097
BNC1	164.331642910838	266.709347022697	902.677462203428	334.843944758177	581.948063336313	770.40065638721	957.173859234899	55.7766514830291
BNC2	781.665454618633	822.924626525491	496.771889971569	420.451429672539	616.610205266625	7.34843779355288	256.485101534054	815.419167513028
BNIP1	723.750977776945	67.4861781299114	559.46871638298	603.768477682024	685.34208019264	406.353864120319	482.092891586944	856.029536342248
BNIP2	606.874896446243	343.462435528636	856.131377164274	585.832200013101	780.914220027626	905.089736217633	349.324976326898	559.929237002507
BNIP3	700.968750519678	247.964312555268	599.189197877422	946.019127266482	151.393079431728	204.442313872278	566.831724485382	673.650908749551
BNIP3L	774.604418780655	350.368906510994	785.233345581219	722.987768240273	899.208823218942	167.432949878275	502.785498974845	663.935243384913
BNIPL	132.476884173229	561.812350759283	413.578970357776	902.674341574311	311.189321568236	182.939147111028	931.548072723672	133.610336109996
BOC	953.214036067948	96.8316679354757	780.11689754203	10.5217446107417	516.339247114956	201.124822488055	641.754786483943	430.10590178892
BOD1	392.422587377951	429.712719516829	976.8133291509	758.865905925632	42.0197381172329	849.556736415252	664.456440834329	698.211185168475
BOD1L1	450.538953999057	880.310567095876	549.282795749605	357.000980060548	749.316071160138	435.58835866861	315.051368670538	248.867168324068
BOD1L2	266.612592618912	714.570414274931	726.131427800283	325.134896207601	893.807714805007	63.7548917438835	95.3042474575341	987.987462198362
BOK	406.011871993542	845.584811177105	712.397485040128	414.459333987907	332.956565078348	933.175363577902	597.290723118931	702.047322876751
BOK-AS1	955.818359972909	935.200408101082	280.4448553361	186.406558379531	184.350990923122	734.206772875041	742.790022632107	975.810386473313
BOLA1	102.163046831265	259.390982799232	452.018819516525	162.033796543255	826.188023900613	819.395279511809	31.6342839505523	987.974496791139
BOLA2	794.380830135196	439.807742135599	731.897106627002	776.80880506523	484.984817216173	961.04225795716	290.280973771587	532.226639799774
BOLA3	447.937729768455	770.201198523864	275.385681539774	500.801501097158	767.759686335921	22.8756852447987	99.271047860384	784.289884380996
BOLA3-AS1	521.296247607097	664.342798292637	347.46161964722	516.091796103865	553.539666347206	832.99934444949	882.617703871801	408.990413649008
BOLL	736.373050371185	629.373213741928	109.98377087526	861.250440590084	971.799762686715	657.280939863995	752.431501168758	932.216598186642
BOP1	604.536303784698	540.827641263604	730.312339030206	300.541803007945	425.642374670133	971.569340210408	377.722685458139	336.951611796394
BORA	150.193842826411	131.097641773522	669.540843460709	547.12575674057	437.284608837217	576.616851380095	635.153073817492	515.088149113581
BPESC1	210.914557334036	608.898788923398	674.050881061703	649.962131166831	239.509942010045	143.176839919761	182.388950372115	2.3362971842289
BPGM	794.999886071309	702.432188205421	136.90898893401	633.019312284887	647.065028082579	110.577077372	519.799153786153	200.351641513407
BPHL	765.185344265774	179.927309742197	738.020132295787	970.955711556599	365.230967756361	275.386529508978	742.150978185236	615.443091606721
BPI	985.503919189796	702.632510568947	564.71396330744	232.405839720741	111.625171266496	725.861766142771	0.753379194065928	495.042140129954
BPIFA1	592.259226832539	404.993548057973	966.413477202877	100.78427544795	920.523907523602	559.750572545454	986.95462802425	281.626837560907
BPIFA2	134.86455148086	204.975491156802	978.726071305573	926.193178864196	672.167287440971	615.066590486094	339.955805800855	935.54249079898
BPIFA3	301.135236164555	577.692989027128	311.734102433547	774.546888889745	732.656515436247	644.246844574809	605.011290404946	650.052058510482
BPIFA4P	123.611100018024	859.529561363161	458.302281331271	347.66371618025	945.973434718326	345.979526638985	206.892440794036	487.139584496617
BPIFB1	441.518358886242	560.740876244381	662.636784370989	214.028247864917	999.821676407009	929.33232570067	466.349222930148	731.038844678551
BPIFB2	168.560130288824	805.346328299493	653.109069447964	261.14535308443	397.967557422817	427.286114078015	738.735105376691	908.896417822689
BPIFB3	889.153578784317	392.880020663142	541.563765145838	448.88943945989	286.594710079953	596.468047471717	711.781748104841	223.379090195522
BPIFB4	405.602381331846	118.051232071593	849.121675128117	435.93763303943	720.151777146384	626.204061321914	421.920457854867	953.134015435353
BPIFB6	604.108322178945	329.162979032844	493.204784113914	428.634202107787	149.146298179403	534.940790850669	416.95683915168	460.746825905517
BPIFC	916.60897503607	988.15116006881	729.856815887615	47.6494806353003	469.766340451315	905.580790713429	111.374762142077	570.516523672268
BPNT1	747.813638998196	63.9768140390515	314.556144876406	380.241442704573	266.533460933715	520.073931431398	385.118745965883	159.991695545614
BPTF	644.595742691308	1.67340063489974	719.325294485316	763.901173369959	359.009039355442	385.393864009529	782.824404304847	175.7641362492
BPY2	594.383724732324	784.015123266727	105.923594208434	518.304931232706	902.029054937884	537.923363503069	657.233181642368	690.191736677662
BPY2B	659.641685895622	700.811645248905	429.02993853204	962.113256799057	705.165329156443	466.691512148827	123.442091513425	992.277302779257
BRAF	308.137586340308	713.398656109348	509.203508030623	72.5363958626986	406.253901310265	743.320678593591	163.595649180934	936.909019947052
BRAP	733.186276396737	347.086449852213	255.291250534356	452.127629891038	83.1821125466377	92.6659887190908	538.780479691923	674.033447634429
BRAT1	91.7551626916975	937.00797855854	955.721606733277	354.265616741031	808.6218314711	449.423954356462	54.8050638753921	374.864062061533
BRCA1	31.3027412630618	683.869619388133	432.052035117522	161.601410014555	385.10120799765	796.175493858755	244.962074793875	221.732086967677
BRCA2	525.964315282181	993.182174162939	246.997657930478	569.539959309623	533.957819920033	355.185626540333	772.92645839043	884.750666329637
BRCAT107	570.292784599587	662.668887525797	213.301533600315	99.972797324881	47.5684800185263	95.7926325500011	124.223687453195	821.871603373438
BRCAT54	323.307963786647	684.821710223332	717.204235261306	179.776759818196	850.770103512332	247.558199800551	856.279049534351	933.677074499428
BRCC3	152.053238125518	421.988592715934	640.237078303471	758.004106581211	391.49697474204	957.439834252	987.901785876602	534.837836632505
BRD1	83.3891159854829	78.0671515967697	382.794354809448	953.830781858414	187.546296278015	850.957336369902	456.483218353242	378.263834165409
BRD2	967.281215358526	478.645257418975	679.718598956242	338.822999037802	27.5626457296312	423.090160591528	348.873959155753	673.371511045843
BRD3	833.075486822054	931.169331539422	694.440084975213	285.093259764835	729.878352489322	438.52104106918	545.912697445601	661.138250725344
BRD4	776.01637551561	540.662514045835	707.225630991161	306.574099930003	431.485447566956	377.10531661287	804.415931459516	65.9266365692019
BRD7	300.249572377652	639.265828765929	516.390107106417	207.638995954767	250.663741491735	192.580102710053	288.217803230509	98.7396710552275
BRD7P3	141.461193328723	651.052436325699	77.932667452842	37.931754020974	911.018349695951	256.222723517567	952.920527430251	745.104297529906
BRD8	231.250542448834	800.518890377134	961.210272973403	22.6862078998238	68.3649363927543	797.324181301519	960.788649041206	643.73621228151
BRD9	966.255026403815	214.359316043556	642.252003308386	186.698633711785	380.524555919692	752.449068007991	69.9848595540971	475.572524126619
BRDT	701.517893467098	374.815504299477	498.377283569425	413.890400202945	932.540795300156	663.379015168175	153.405123157427	963.555050548166
BRDTP1	518.383390735835	711.816720431671	233.702185563743	684.953309129924	378.811250673607	753.259126329795	174.969202606007	181.03139474988
BRE	76.0221891105175	792.46022971347	898.631957359612	736.660169903189	344.210433308035	791.109994519502	40.820789989084	661.91387292929
BRE-AS1	360.743703786284	623.151041334495	168.528445763513	11.9676536414772	674.102944787592	319.962324108928	241.5447155945	561.034831451252
BREA2	936.504158657044	920.283315004781	522.03565905802	545.004628365859	48.9518467802554	590.84773529321	957.707898691297	187.252083327621
BRF1	942.877209745347	989.349440205842	690.505780745298	635.437570512295	271.0656512063	784.46685266681	21.2643144186586	454.950368031859
BRF2	874.831916764379	467.886445578188	142.307460308075	653.858257457614	342.503602616489	32.4454472865909	647.520451340824	329.075961606577
BRI3	344.978431472555	397.725575836375	38.664402673021	528.48512167111	346.211669268087	252.206878503785	825.658831745386	234.634459018707
BRI3BP	769.337347010151	279.218516778201	980.121874017641	23.5978178679943	714.374583214521	526.754986261949	54.5007246546447	307.648530462757
BRICD5	198.878732975572	666.206340771168	900.637797545642	11.9288847781718	450.668040663004	807.831942336634	335.643103579059	314.311328344047
BRINP1	399.263959145173	994.191094767302	942.129277391359	635.878602974117	514.840789604932	758.017030311748	167.866800678894	29.6775524038821
BRINP2	949.393426533788	228.010929655284	32.4236727319658	383.891157107428	688.857245258987	683.489009505138	60.3009944316	546.766666462645
BRINP3	493.199743563309	995.975014287978	689.900274621323	79.6397053636611	720.835282467306	672.249532537535	516.009051119909	399.154652608559
BRIP1	645.211235852912	258.052471792325	138.936649542302	190.024967072532	383.140253601596	289.576531620696	516.633844003081	788.857554784045
BRIX1	837.357691023499	160.41456675157	365.587828448042	838.652591686696	98.0620861519128	989.46279194206	397.650509839877	752.390917623416
BRK1	792.652789968997	254.80288057588	855.777818709612	737.938922597095	131.227712146938	442.525258753449	974.158661207184	116.599288769066
BRMS1	335.098848445341	961.869177175686	558.702064212412	964.268149342388	153.718250803649	522.591629996896	433.9235345833	501.99712626636
BRMS1L	147.215046454221	578.623357927427	675.672864541411	668.336996110156	762.774506350979	162.303886609152	201.2637371663	162.491932045668
BROX	95.0292365159839	111.000176751986	597.465638304129	440.313366940245	360.881196334958	64.8374916054308	526.249141898006	55.716190719977
BRPF1	362.331100506708	261.573580792174	714.242662070319	307.730470784009	478.926596930251	514.837340218946	813.483671750873	590.45333485119
BRPF3	632.501239655539	83.6187393870205	269.260595319793	694.358317647129	575.713616563007	314.614286413416	84.13095632568	871.891085524112
BRS3	101.107940776274	343.404101906344	108.390090521425	928.839954547584	783.283943543211	651.660611387342	829.740550369024	453.905097208917
BRSK1	505.665067350492	196.83654140681	54.535337490961	214.747305959463	664.766435045749	160.271791508421	932.139506330714	657.843248452991
BRSK2	8.39735940098763	765.905431471765	398.725535022095	459.310972830281	513.542264932767	362.096108263358	947.843243135139	645.386060001329
BRWD1	506.383732892573	856.740843271837	256.699316902086	655.689063249156	471.691469661891	655.592428287491	827.83785671927	13.1520899012685
BRWD1-AS1	908.40361174196	387.949547031894	600.704826647416	288.770121755078	112.209517974406	510.902058100328	702.776249265298	605.141200823709
BRWD1-IT2	92.827470973134	989.183916011825	878.582996083423	742.565864464268	745.163987390697	79.6916570980102	994.298234814778	855.152133386582
BRWD3	905.772334896028	233.623052481562	414.089905796573	302.690976066515	781.66024480015	688.382793450728	117.875166935846	703.222270356491
BSCL2	389.740160200745	656.647588824853	411.907154833898	101.87562298961	114.207744365558	104.788189055398	161.673875758424	215.124445734546
BSDC1	302.765092346817	125.604464439675	886.891905451193	298.352354438975	517.662635305896	727.552557829767	507.998509099707	560.287011787295
BSG	420.826699817553	182.962214341387	619.783217087388	14.3219099845737	612.796768313274	94.1883374471217	735.108101740479	932.127092033625
BSN	363.292435649782	752.675151918083	844.63073220104	651.605513645336	983.910852111876	364.939271239564	285.472181392834	98.6077173147351
BSN-AS2	880.544642917812	488.428485812619	807.599392719567	218.365245498717	837.106650928035	461.021353490651	91.1281702574342	902.860279893503
BSND	57.8216656576842	800.812303321436	315.65819773823	945.07411820814	157.233785372227	672.126001445577	106.022577499971	239.910413278267
BSPH1	454.744206508622	556.016769260168	370.172775583342	917.679227655753	22.5555223878473	801.083750091493	570.473866537213	930.219606263563
BSPRY	704.248903086409	735.992230009288	929.523286176845	835.097637027502	224.555236520246	340.808003209531	142.11632264778	631.425797007978
BST1	706.309048691764	311.89402169548	385.86061517708	326.614080695435	854.772786376998	327.944407006726	415.343262022361	89.0717720612884
BST2	332.05844159238	757.727061398327	705.371109768748	969.712123973295	937.457824824378	263.815560145304	87.6437402330339	504.44292742759
BSX	188.673636643216	438.350171083584	406.8006221205	58.227019617334	336.011701030657	105.600333306938	918.027132283896	208.426816388965
BTAF1	722.88609133102	311.657458543777	554.856657516211	96.1123302113265	530.055663781241	147.901135263965	585.383725585416	719.571504741907
BTBD1	768.090015975758	676.463193492964	735.505699645728	167.571139754727	638.236366678029	898.772368207574	140.71966544725	822.476400062442
BTBD10	971.814119024202	307.063671760261	890.215582912788	977.102482924238	441.954614361748	741.151471622288	919.883985538036	892.389525426552
BTBD11	812.058154027909	115.379001712427	465.59391845949	828.969119349495	645.223210332915	369.812105316669	286.192750558257	395.262664882466
BTBD16	999.725544825196	847.760934149846	210.64936532639	311.697535216808	979.524480178952	909.525238443166	768.839144380763	305.335958721116
BTBD17	368.096317630261	63.3052852936089	109.088872559369	264.898896915838	202.943161828443	236.749139148742	931.678105378523	753.06635722518
BTBD18	835.631020599976	311.878292122856	339.085610117763	872.484766179696	94.6265491656959	413.235865067691	146.981590194628	252.021156484261
BTBD19	611.321282107383	205.082462402061	381.255882093683	623.582672094926	210.745883872733	850.991482613608	542.137091513723	608.800719724968
BTBD2	971.961398841813	912.753083044663	621.283416170627	169.631124008447	361.601586919278	965.703167486936	179.973629303277	520.29586606659
BTBD3	113.783927168697	256.393109913915	203.55624333024	445.89995383285	302.62132990174	800.550662912428	28.20516936481	253.840281162411
BTBD6	739.204965298995	673.298226203769	422.664956888184	92.6595227792859	608.312680618837	425.440925173461	611.186939291656	743.953507160768
BTBD7	538.127100095153	611.382812960073	481.675101211295	942.886632634327	783.730127615854	188.930995762348	737.139053409919	596.006426028907
BTBD8	38.4018009062856	953.471450833604	569.886747514829	373.075293144211	26.679202914238	506.016358034685	621.077666291967	345.498728798702
BTBD9	423.721614060923	516.430080868304	295.973751926795	912.789833499119	101.766305509955	548.87130879797	788.073668954894	370.606154203415
BTC	571.634319610894	109.019563300535	707.623669179156	946.791817201301	503.911370877177	362.543500494212	595.220871036872	131.914894329384
BTD	234.091905411333	189.981839386746	210.393751738593	472.449022345245	315.143561922014	845.379886683077	190.910843666643	441.803433001041
BTF3	20.5177774187177	242.313620168716	655.804056208581	857.086099917069	267.970922403038	592.557202093303	585.0869291462	172.676448477432
BTF3L4	395.836700685322	677.610277198255	948.759508319199	725.003086263314	963.68135814555	506.082707550377	635.761425830424	500.63601299189
BTF3P11	871.327826986089	572.610341245309	130.001484416425	555.664356332272	421.566252363846	306.692176498473	201.052606338635	311.561141163111
BTG1	341.929661575705	476.620993809775	65.5603846535087	940.314674051479	5.88581478223205	438.750260043889	83.4255903027952	762.003606185317
BTG2	727.419364266098	834.247871534899	477.225107140839	624.063259223476	646.612987620756	700.078048277646	68.1624140124768	727.433498715982
BTG3	837.847265414894	156.225532758981	151.923027820885	436.628496740013	637.487980537117	667.523256037384	119.989915750921	275.13989736326
BTG4	116.310437675565	638.929212465882	949.93975572288	914.05677027069	72.3368080798537	360.546097857878	933.854390168563	109.50827691704
BTK	288.547204341739	304.815002717078	515.252417651936	460.533551871777	956.337300827727	185.66645309329	660.113440826535	80.1655892282724
BTLA	766.39416650869	700.886325677857	349.117655074224	663.047477602959	482.479087542742	262.356622843072	569.81334136799	54.9534882884473
BTN1A1	382.699276320636	538.222416769713	897.4013205152	714.680881705135	376.532481517643	866.906471783295	641.664675204083	519.022131804377
BTN2A1	842.961873160675	787.535577081144	905.373979592696	601.919264066964	751.071282662451	467.177139595151	422.659974778071	931.116947671399
BTN2A2	383.28210148029	267.399827949703	166.634841356426	874.702598201111	869.035651674494	311.72224576585	114.882132504135	235.423181438819
BTN2A3P	247.365574585274	426.456091925502	496.973730390891	238.116231514141	370.324549730867	497.905946569517	480.003588832915	429.217396304011
BTN3A1	599.726283922791	524.957639165223	255.034622037783	277.993978699669	373.412595828995	970.749406842515	936.195492977276	290.762852644548
BTN3A2	401.226691668853	973.586778854951	74.5743832085282	859.542585909367	12.8517395351082	236.017752671614	786.641449434683	622.715957229957
BTN3A3	675.109303090721	701.189689803869	297.046991065145	545.5142268911	903.890460031107	303.974356967956	839.425329351798	453.70152592659
BTNL10	320.451433304697	220.273452345282	97.7098762523383	730.358615983278	352.907166583464	767.367271939293	51.9099433440715	618.725769687444
BTNL2	616.317497100681	509.361560689285	124.751119175926	700.448689516634	847.971091978252	463.069518562406	442.010073689744	892.366028390825
BTNL3	630.435169907287	888.370860368013	358.765339944512	180.153538007289	501.774856587872	265.469348290935	695.193762658164	981.743809301406
BTNL8	960.876572644338	333.402574760839	926.585694542155	932.046649279073	452.137438813224	303.700093412772	21.3030045852065	509.676140034571
BTNL9	385.791508480906	710.895386291668	728.571897139773	765.182537725195	497.623694129288	67.7389230113477	890.377060044557	924.08365313895
BTRC	783.78293919377	245.492661138996	891.045231139287	516.329981619492	602.888873312622	440.418112790212	179.852147120982	24.7823225799948
BUB1	669.824550626799	969.411182682961	56.1709832400084	233.618167228997	165.526645956561	209.691327996552	454.91957035847	886.656592600048
BUB1B	388.084752717987	512.542308308184	590.728667331859	33.8503660168499	686.794605804607	811.357407364994	333.585985004902	851.81945678778
BUB3	523.585403338075	561.50136096403	846.08340729028	509.635251946747	385.472255060449	349.548459984362	219.550541834906	857.355837943032
BUD13	992.928734514862	155.930174980313	614.164422964677	988.824022933841	17.963022692129	267.088636523113	699.820412322879	847.365079447627
BUD31	566.011405084282	312.96796631068	810.400060378015	42.1605987939984	57.0427132770419	896.957917138934	64.3714575562626	875.424382044002
BVES	391.824641963467	400.505416328087	500.409049680457	715.147170936689	70.8089680410922	364.556920481846	280.619353987277	366.437068441883
BVES-AS1	672.525156289339	265.01938723959	997.555845417082	947.41937238723	125.073740025982	21.7047582846135	721.742260502651	431.890471139923
BYSL	814.409032929689	639.162037055939	872.922964859754	15.3009123168886	288.896861486137	841.226589400321	617.670030798763	160.514021990821
BZRAP1	651.303452439606	923.587116645649	861.517610959709	506.308857817203	907.076039817184	412.456736899912	592.276706825942	97.6871531456709
BZRAP1-AS1	350.534436525777	532.225428149104	643.326110206544	668.347110971808	229.245857102796	839.936250820756	450.315830064937	752.794821280986
BZW1	5.18694240599871	609.526968328282	803.408439736813	946.777776582167	881.606596522033	109.795997384936	199.310270603746	311.744187027216
BZW2	792.010249570012	726.857526227832	204.673270694911	976.683640386909	50.09327060543	377.280975459144	443.193260580301	918.75428869389
C10orf10	395.542558282614	504.4135148637	3.39119881391525	816.02609413676	487.415126059204	295.943957054988	70.6951217725873	103.929170873016
C10orf105	992.593849077821	74.7483980376273	188.226741272956	404.302191222087	53.9128659293056	740.635429741815	571.274509420618	80.8738293126225
C10orf107	721.639638068154	870.666249888018	133.99909180589	856.977657647803	74.3024353869259	6.29079062491655	488.683574832976	560.783724999055
C10orf11	331.049958011135	451.61415846087	261.329808039591	952.111730119213	176.796844927594	987.676018383354	293.420115020126	268.971579615027
C10orf111	413.477251306176	310.178079176694	563.536947127432	446.004188153893	385.743150487542	276.263195089996	597.251834347844	414.72769388929
C10orf113	120.734275784343	50.2398521639407	831.605839543045	682.269991142675	189.057994633913	900.452540256083	283.251882065088	859.824438113719
C10orf12	810.371296945959	145.819296129048	373.389068525285	36.8453857954592	353.557594586164	143.877952126786	907.817841274664	714.240789413452
C10orf120	651.913785608485	88.7112803757191	832.971580792218	487.028058851138	420.496451901272	293.813247932121	744.019910693169	943.36339761503
C10orf126	470.271524041891	910.701806424186	268.515417119488	557.367086410522	324.511589715257	301.192122744396	934.236619621515	634.824310429394
C10orf128	896.529241697863	72.0089746173471	972.162557765841	249.516159063205	562.867820961401	491.680494742468	826.224252814427	986.034956760705
C10orf131	668.55134582147	365.242343395948	637.44515972212	653.832081938162	795.211338670924	781.077427091077	146.677086828277	248.677119845524
C10orf142	265.804054914042	754.521732917055	886.351814260706	78.0219042208046	81.7178797442466	359.599983552471	804.076296510175	136.699008522555
C10orf2	73.6832220572978	297.234961995855	593.747989274561	160.469549242407	331.319773336872	256.262024398893	473.213145276532	175.851056585088
C10orf25	983.457611640915	514.524757862091	389.261034782976	363.292579771951	651.184721617028	620.625402545556	546.142008621246	395.903392229229
C10orf32	327.436709078029	29.6288798563182	846.685114083812	164.356122724712	858.651148155332	940.044030314311	185.004085768014	531.592929270118
C10orf32-ASMT	373.531123390421	638.795044738799	532.491736346856	432.978528551757	49.0619002375752	224.320383975282	653.122861171141	898.184006102383
C10orf35	549.609923968092	284.449054161087	158.207627944648	924.437542678788	386.360643198714	986.096909502521	179.341835901141	238.813326694071
C10orf53	826.394684612751	332.196269882843	88.3573507890105	778.623186750337	654.939705040306	320.043509593233	131.361890118569	589.96410202235
C10orf54	212.988396175206	711.432812968269	880.835246061906	271.20967535302	807.318892562762	162.00608946383	671.690044691786	759.177871979773
C10orf55	470.031243981794	218.119943281636	562.712440500036	286.953950067982	331.596539122984	145.86115675047	686.127036111429	735.646074870601
C10orf62	545.952196232975	472.295775776729	197.574217105284	386.351548368111	652.233337750658	759.142571594566	366.359558654949	376.998566091061
C10orf67	704.517459496856	33.1711699254811	401.185551192611	930.85017404519	467.01644663699	620.551338652149	754.018095554784	977.495341328904
C10orf71	714.528327342123	889.523156452924	170.229594223201	795.042894547805	794.281860813498	272.595399292186	724.315854022279	173.21080644615
C10orf71-AS1	474.849881371483	756.292008096352	47.9859642218798	172.367091756314	133.094612276182	306.565902661532	185.16333354637	472.953809192404
C10orf76	365.061233751476	72.8927736636251	451.818734407425	69.4650949444622	865.370466839522	742.012797156349	832.521593896672	438.518463866785
C10orf82	947.770671220496	700.367052108049	841.758074704558	300.989551469684	974.651359720156	134.966945042834	504.895827267319	874.241112731397
C10orf88	950.249712215737	630.197797669098	461.493471171707	223.449025070295	400.462908670306	245.777803007513	192.951522534713	903.095143614337
C10orf90	174.824851332232	818.631777074188	111.259904922917	647.228248650208	64.1666015144438	17.4347711727023	351.540259085596	387.550765648484
C10orf91	487.481202697381	687.098218360916	243.076362414286	2.60239536873996	688.961098203436	298.01573115401	932.493992848322	881.249855272472
C10orf95	644.295748090371	537.562159122899	536.594844190404	86.5492201410234	952.08121323958	330.008502816781	960.455349413678	643.038371577859
C10orf99	95.6924243364483	757.745187496766	565.540163777769	130.522838095203	215.912007493898	958.65121926181	308.081571478397	551.481033675373
C11orf1	482.954756356776	63.4620268829167	566.939432872459	506.759679643437	745.559753617272	860.77204043977	115.646053338423	870.770279318094
C11orf16	740.650751627982	590.00862413086	711.432049749419	409.180354326963	170.134076848626	957.627859665081	216.775504406542	760.370161384344
C11orf21	871.076241135597	295.449931407347	510.087750153616	226.035206113011	630.570417502895	815.946600399911	774.528812617064	435.137094696984
C11orf24	53.4250091295689	913.974110968411	949.967105872929	166.707135736942	492.859779857099	335.083927027881	478.865030221641	92.0510464347899
C11orf30	776.328731095418	772.104807430878	953.122877515852	181.56024813652	456.339119467884	769.479169510305	697.692060377449	483.20499365218
C11orf31	199.542342219502	762.729159556329	284.020383609459	954.958805348724	784.049591980875	422.179775312543	138.149511069059	181.764473207295
C11orf39	975.374854868278	27.5603358168155	33.5012983996421	323.241776553914	436.800049850717	918.148029362783	615.441319765523	277.424691943452
C11orf40	531.546708429232	259.120634524152	572.166095487773	380.527870729566	520.158996805549	109.145084628835	198.674833402038	561.737335519865
C11orf42	96.0647976025939	124.378332402557	169.108539121225	246.427825652063	378.261560807005	530.063098995015	309.591343160719	501.235547242686
C11orf44	908.801037818193	317.702957428992	864.703816361725	870.420078979805	929.171991534531	773.393313167617	185.809234855697	373.870240990072
C11orf45	165.256363106892	476.679796585813	654.732121387497	12.7897087950259	313.524101860821	790.551780723035	296.315824380144	942.198917968199
C11orf49	406.600955408067	372.551656793803	231.105651473626	810.088095488027	861.313551664352	744.060020893812	28.948629507795	897.505183471367
C11orf52	438.992534065619	783.027672907338	976.586326956749	598.906814353541	121.983132325113	27.560078073293	51.1104073375463	112.322682747617
C11orf53	875.46650855802	49.3337081279606	727.019111858681	315.257313195616	741.168025881052	799.519313266501	355.13024427928	296.614348655567
C11orf54	595.625483663753	17.9076325148344	599.774873349816	284.998915856704	28.5311648622155	502.694928320125	501.847258303314	975.847378838807
C11orf57	621.221242938191	285.286542028189	877.529719378799	978.130034636706	626.302881632	619.198541389778	616.739154793322	464.458748698235
C11orf58	136.439370224252	865.955682704225	116.396943107247	585.804987465963	317.838803399354	310.408927267417	131.353257223964	564.432973274961
C11orf63	788.055626908317	6.73488457687199	283.323407405987	984.003217192367	266.075518215075	736.274690600112	209.762873826548	424.831200856715
C11orf65	704.79099592194	831.274756463245	209.127800771967	644.338775426149	905.246385140345	756.301856134087	538.425836944953	407.496308907866
C11orf68	225.566375534981	536.323838168755	453.210230451077	81.1167338397354	64.2534715589136	142.339661717415	418.153478531167	707.12172286585
C11orf70	932.148867752403	220.726163359359	115.903672762215	276.304305531085	574.177865870297	845.081347273663	337.342773796991	536.04275174439
C11orf71	732.602385338396	62.2017285786569	91.3643806707114	542.915922123939	513.730685925111	941.222600173205	833.376198308542	212.438827380538
C11orf72	305.16836582683	639.758913777769	558.734403690323	676.898643607274	118.656710721552	254.464549245313	800.30500376597	880.153943551704
C11orf73	467.348834732547	190.95616787672	146.695382660255	860.940483631566	168.916208436713	687.140789581463	265.628544148058	733.229250181466
C11orf74	286.250813864172	918.357789283618	140.889570815489	460.141935385764	662.980223540217	230.018879054114	873.486334457994	515.187004581094
C11orf80	530.040733749047	667.431526817381	723.041440360248	650.824238546193	831.330414861441	820.017187157646	723.022053018212	399.603875819594
C11orf84	987.467559054494	405.927090905607	788.187907543033	756.941301748157	963.241732912138	559.676923789084	470.056841382757	48.4867505729198
C11orf85	998.29784152098	465.581957949325	985.630029346794	529.677158920094	310.057256370783	874.914622399956	64.4697649404407	282.566873822361
C11orf86	182.832320220768	307.504144264385	930.423739599064	534.128926694393	961.554488399997	839.475754648447	55.9733158443123	370.680881896988
C11orf87	830.225013196468	684.135031187907	343.736574752256	293.928719125688	821.137509308755	692.164019681513	581.855908967555	826.904554385692
C11orf88	543.626755475998	48.6282410565764	794.761144323274	295.998945133761	235.751110129058	162.630240898579	98.2686595525593	324.378366582096
C11orf91	343.462500022724	420.998849440366	106.032710988075	817.795817973092	256.617384264246	532.27494773455	233.594570076093	938.433104427531
C11orf94	615.752267884091	305.850545177236	776.465988252312	259.719562483951	775.391824776307	206.688039936125	265.5044849962	934.036216465756
C11orf95	569.516281364486	758.8042228017	341.971289599314	813.04983748123	575.208457419649	215.619537048042	46.2583957705647	879.102628678083
C11orf96	196.910574566573	34.852440468967	256.733862450346	472.379351966083	858.583491295576	439.43532044068	533.184038475156	738.615370821208
C11orf97	121.468815021217	813.297583954409	143.497697543353	623.035366414115	11.2419240176678	175.312923733145	295.199052896351	408.065773779526
C11orf98	238.741484005004	810.693683335558	366.547376383096	947.501383488998	544.722326565534	716.260232729837	112.316380487755	995.131498435512
C12orf10	466.284736292437	779.509657295421	463.387415278703	3.94559162668884	328.27070215717	786.098283715546	907.594995573163	643.058018293232
C12orf29	700.859165983275	556.826439220458	223.706986056641	606.314740609378	546.456198673695	72.4531444720924	872.69950658083	36.3995768129826
C12orf4	374.411999480799	57.5871374458075	984.602218028158	697.036302415654	414.295485243201	207.296885317191	782.206850126386	84.1018441133201
C12orf40	441.737951245159	439.197875326499	329.754281789064	656.040490139276	532.426361460239	421.925653703511	587.98381104134	697.599556529894
C12orf42	735.576395643875	196.69815315865	513.100678101182	169.224095297977	778.059492819011	157.480403315276	278.571320697665	147.602843353525
C12orf43	140.745806740597	765.595013275743	778.702801093459	178.075986914337	416.09574877657	196.056072600186	517.670116620138	33.9613105170429
[truncated: 24,257 more rows]
